# Supplementary material for: Direct access to vicinally functionalized and N-trifluoroacetylated (bicyclic)ketopiperazines using a readily affordable N-heterocyclic anhydride
Source: Royal Society of Chemistry journal article supplement (doi:10.1039/d0ob00049c), 2020-01-01
Supplement: d0ob00049c1.pdf [file d0ob00049c1.pdf]

Supporting Information for:

*Direct access to vicinally functionalized and N-trifluoroacetylated (bicyclic)ketopiperazines  
using a readily affordable N-heterocyclic anhydride*

*Antonio Moreno and Timothy K. Beng\**

*Department of Chemistry, Central Washington University,  
Ellensburg, WA 98926, USA  
[Timothy.beng@cwu.edu](mailto:Timothy.beng@cwu.edu)*

*Contents:*

|                                                            |     |
|------------------------------------------------------------|-----|
| 1. General Experimental Information and Procedures.....    | S2  |
| 2. Synthesis of anhydride <b>7</b> .....                   | S2  |
| 3. Hexannulation with lactim ethers (Scheme 1).....        | S4  |
| 4. Hexannulation of with imidoyl chlorides (Scheme 2)..... | S8  |
| 5. Hexannulation of with aldimines (Scheme 3).....         | S12 |
| 6. Hexannulation of with 1,3-azadienes (Scheme 4).....     | S66 |
| 7. Synthetic applications (Scheme 5).....                  | S86 |
| 8. References .....                                        | S96 |

## 2. Experimental Section

All experiments involving air and moisture sensitive reagents such as palladium precatalysts and organolithium reagents were carried out under an inert atmosphere of nitrogen and using freshly distilled solvents. Column chromatography was performed on silica gel (230-400 mesh). Thin-layer chromatography (TLC) was performed using Silicycle Siliaplate<sup>TM</sup> glass backed plates (250  $\mu\text{m}$  thickness, 60  $\text{\AA}$  porosity, F-254 indicator) and visualized using UV (254 nm) or  $\text{KMnO}_4$  stain. Unless otherwise indicated,  $^1\text{H}$ ,  $^{13}\text{C}$ , and DEPT-135 NMR, COSY 45, HMQC, and NOESY spectra were acquired using  $\text{DMSO-d}_6$ ,  $\text{CD}_3\text{OD}$  or  $\text{CDCl}_3$  as solvent at room temperature. Chemical shifts are quoted in parts per million (ppm). HRMS-EI<sup>+</sup> data were obtained using either electrospray ionization (ESI) or electron impact (EI) techniques. High-resolution ESI was obtained on an LTQ-FT (ion trap; analyzed using Excalibur). High resolution EI was obtained on an Autospec (magnetic sector; analyzed using MassLynx).

### General Procedure A: Synthesis of anhydride 7

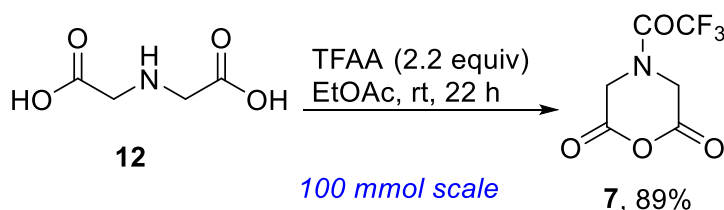

To an oven-dried 500 mL round bottomed flask equipped with stir bar was added diacid **12** (13.30 g 100 mmol, 1 equiv) and dry ethyl acetate (250 mL). Trifluoroacetic anhydride (30.8 mL, 220 mmol, 2.2 equiv) was added slowly under nitrogen. The cloudy mixture was stirred at room temperature for 22 h (as judged by TLC and GCMS). The mixture was concentrated under reduced pressure and washed three times with ice-cold petroleum ether to afford the anhydride, which was used without further purification.

### General Procedure B: Cycloaddition with anhydride 7

A 5 mL screw-cap vial was flame-dried, evacuated and flushed with nitrogen. A solution of the lactim ether/imidoyl chloride/amine/azadiene (1.0 mL, 0.10 M in freshly distilled toluene) was added to the vial at room temperature followed by anhydride **7** (1 equiv). The contents were placed in a pre-heated oil bath thermostatted at the desired temperature (usually 100  $^\circ\text{C}$ ). After complete conversion (as judged by TLC and NMR), the mixture/suspension was cooled to room temperature

and washed several times with petroleum ether, then concentrated under reduced pressure to afford the crude cycloadduct.

#### **Methyl esterification of cycloadduct**

To a stirring suspension of the acid (1 mmol), dissolved in DMF (5 mL), and  $K_2CO_3$  (3 equiv) was added methyl iodide (2 equiv) under nitrogen atmosphere. The reaction mixture was stirred for about 12 h (TLC monitoring). After complete conversion, it was diluted with water and extracted with EtOAc (2×20 mL). The combined organic extracts were washed with brine, dried over  $MgSO_4$  and concentrated *in vacuo* to give the desired ester, which was purified by flash chromatography on silica.

#### **General Procedure C: Vilsmeier-Haack reaction**

To a solution of DMF (6 mmol, 6 equiv) in  $CH_2Cl_2$  (5 mL) at 0 °C was added dropwise, phosphorus oxychloride (3 mmol, 3 equiv). The resulting pale yellow mixture was refluxed for 40 min. A solution of the lactam (1 mmol, 1 equiv) in  $CH_2Cl_2$  (5 mL) was added slowly under reflux. After complete addition of the lactam, the mixture was cooled to room temperature and stirred for the indicated time period (TLC and LC-MS monitoring was used to follow the extent of the reaction). Upon completion, the mixture was poured into a large flask containing crushed ice. After stirring at rt for 60 min, the layers were separated. Powdered  $K_2CO_3$  was added slowly to the mixture and the flask was swirled after each addition (**Caution:** it bubbles vigorously). The addition/swirling was continued until persistent cloudiness was observed. The neutralized/slightly basic mixture was extracted three times with  $CH_2Cl_2$  and washed with brine. The combined organic layers were dried over  $Na_2SO_4$  for 30 min. The mixture was filtered and concentrated under reduced pressure to give the desired product as an oil.

#### **General Procedure D: Catalytic hydrogenation**

EtOAc (10 mL) was added to a flask containing 10% Pd/C (100 mg) at room temperature. The flask was degassed and placed under an inert atmosphere of nitrogen. A solution of the unsaturated lactam in EtOAc (10 mL) was added. After complete addition, the nitrogen line was cut off and then replaced with a balloon of hydrogen. After complete consumption of the unsaturated lactam (based on LC-MS and TLC monitoring), the mixture was filtered through a plug of Celite and concentrated under reduced pressure.

## Reaction with lactim ethers

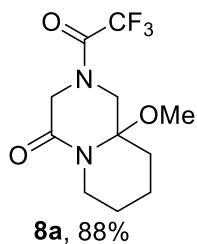

Prepared from **2a** (113.3 mg, 1.0 mmol) and anhydride **7** (211.1 mg, 1.0 equiv) using General Procedure B. T = 110 °C, time = 22 h. Purification: Flash chromatography on silica eluting with hexane/EtOAc (75:25). Yield = 247 mg, 88%. <sup>1</sup>H NMR (400 MHz, Chloroform-*d*) δ 4.67 (d, *J* = 1.6 Hz, 1H), 4.56 (s, 1H), 4.08 – 4.03 (m, 2H), 3.63 – 3.49 (m, 5H), 2.45 – 2.36 (m, 2H), 1.73 – 1.63 (m, 4H). <sup>13</sup>C NMR (101 MHz, CDCl<sub>3</sub>) δ 173.69, 173.54, 171.00, 170.41, 168.26, 168.20, 157.86, 157.66, 157.50, 157.30, 156.93, 120.45, 117.59, 114.73, 111.87, 55.36, 55.32, 55.12, 52.77, 52.53, 49.61, 49.57, 49.47, 44.70, 44.62, 34.50, 34.45, 22.21, 22.18, 20.09, 19.98. **HRMS-EI**<sup>+</sup> (*m/z*): calc'd for C<sub>11</sub>H<sub>15</sub>F<sub>3</sub>N<sub>2</sub>O<sub>3</sub> 280.1035; found 280.1042.

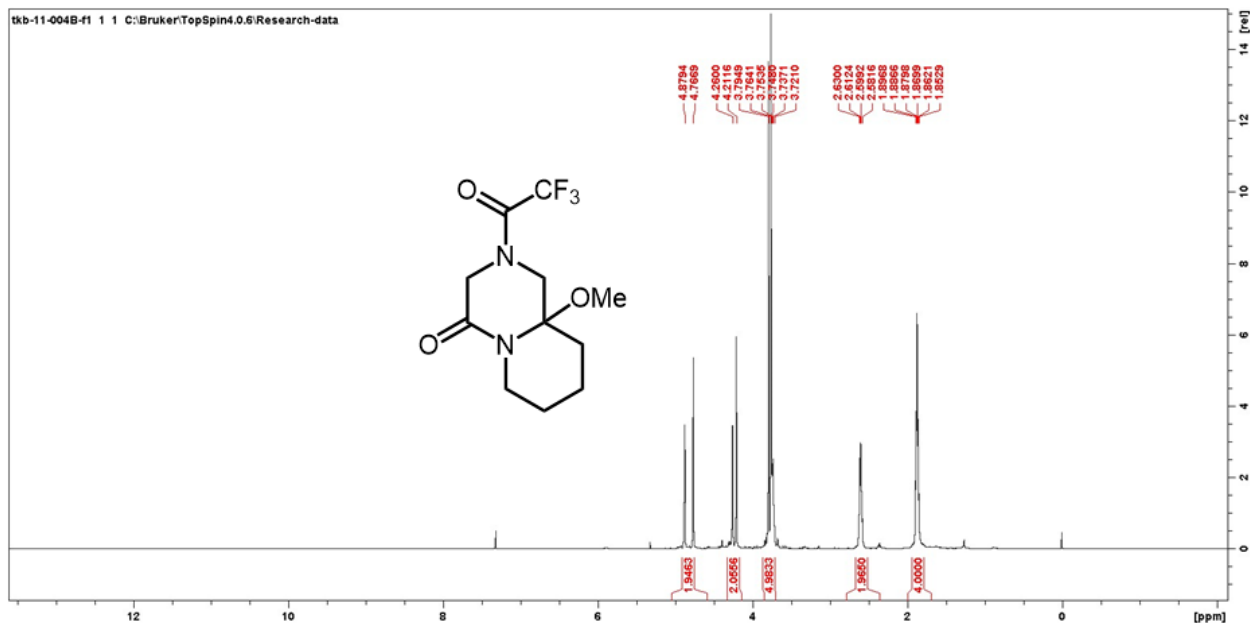



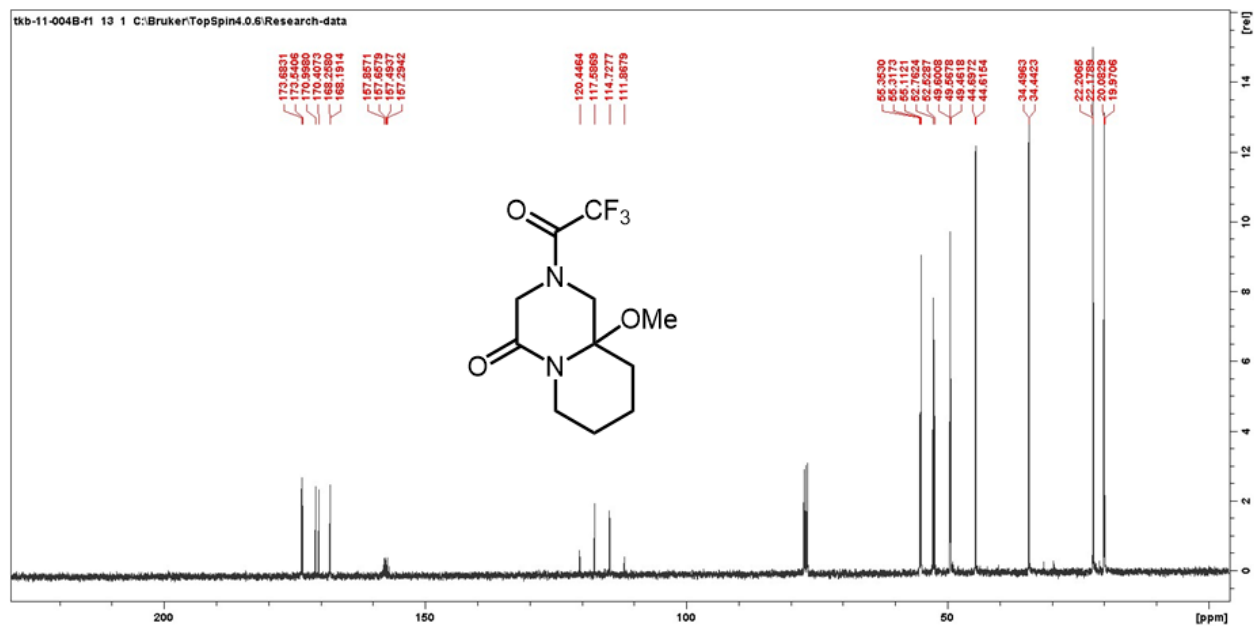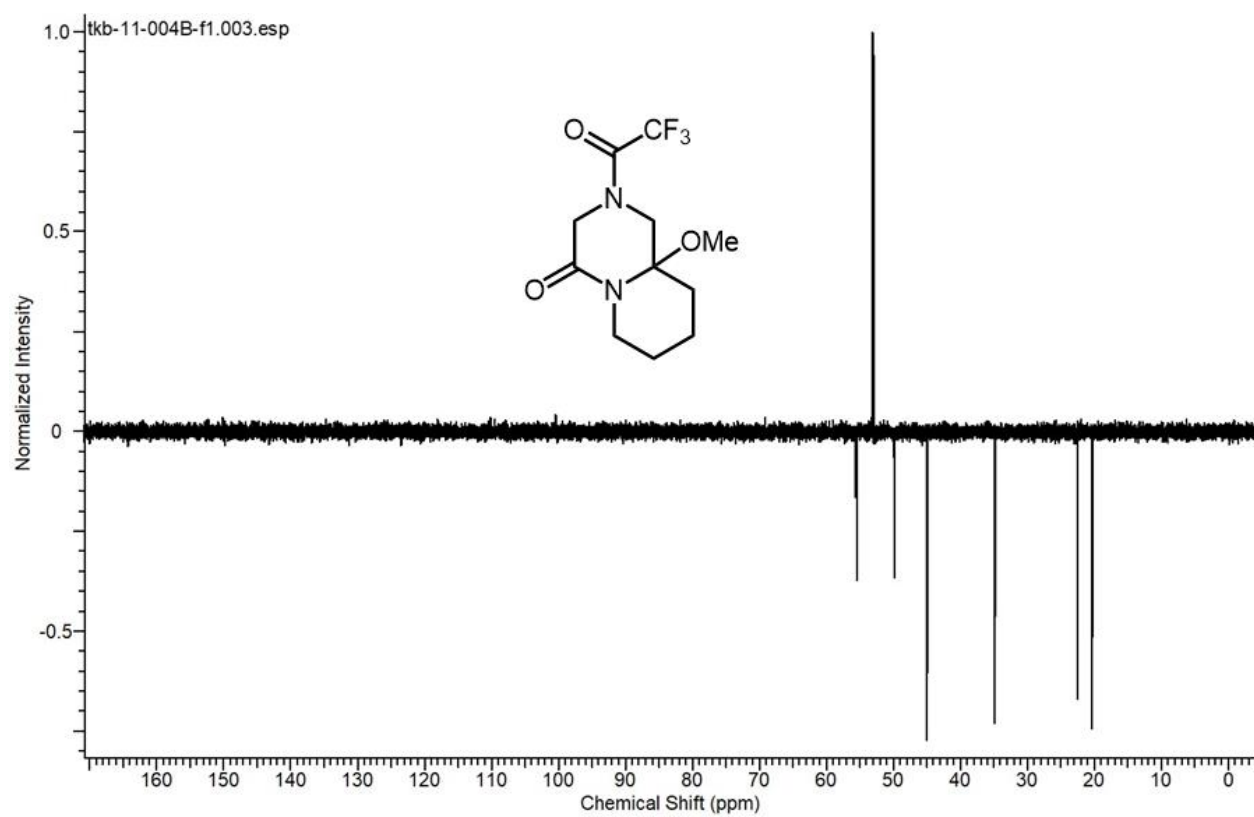

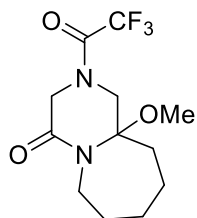**8b**, 83%

Prepared from **2b** (127.5 mg, 1.0 mmol) and anhydride **7** (211.1 mg, 1.0 equiv) using General Procedure B. T = 110 °C, time = 22 h. Purification: Flash chromatography on silica eluting with hexane/EtOAc (75:25). Yield = 244 mg, 83%. <sup>1</sup>H NMR (400 MHz, Acetonitrile-*d*<sub>3</sub>) δ 4.66 (s, 2H), 4.13 – 3.99 (m, 2H), 3.77 (q, *J* = 5.5 Hz, 2H), 3.62 (s, 3H), 2.58 (m, 2H), 1.70 – 1.64 (m, 6H). <sup>13</sup>C NMR (101 MHz, CDCl<sub>3</sub>) δ 178.17, 178.04, 170.48, 169.95, 168.28, 117.64, 117.60, 114.74, 55.02, 52.85, 52.62, 49.71, 43.84, 43.81, 39.34, 29.80, 29.21, 29.13, 28.46, 23.67, 23.64. **HRMS-EI**<sup>+</sup> (*m/z*): calc'd for C<sub>12</sub>H<sub>17</sub>F<sub>3</sub>N<sub>2</sub>O<sub>3</sub> 294.1191; found 294.1198.

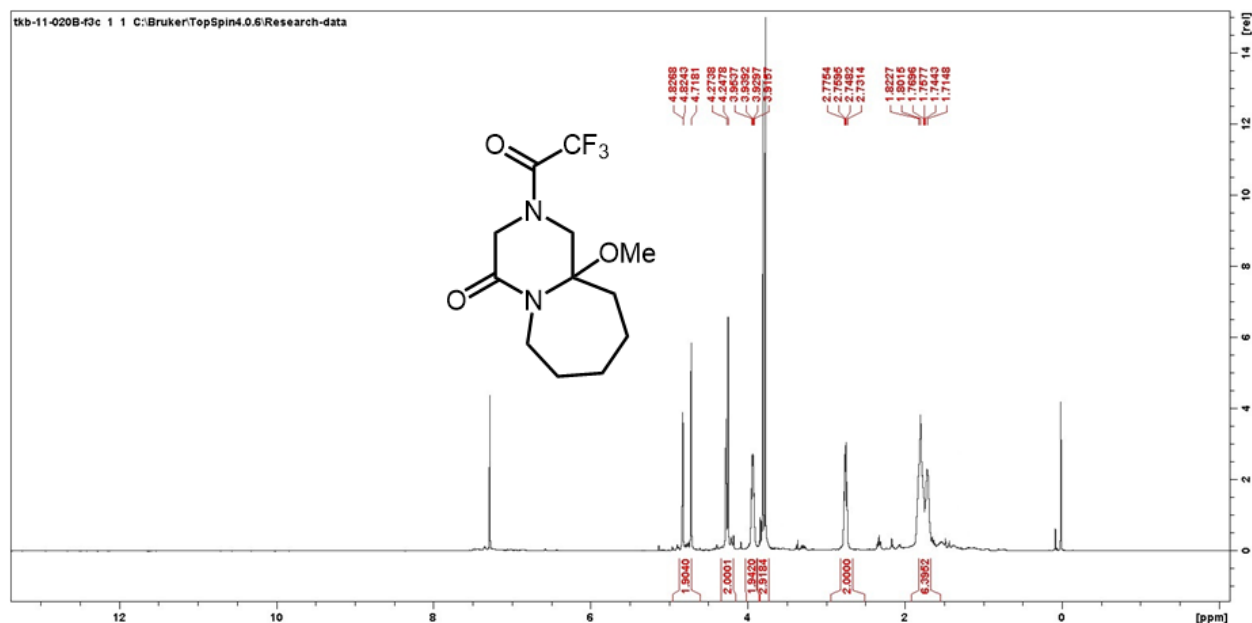

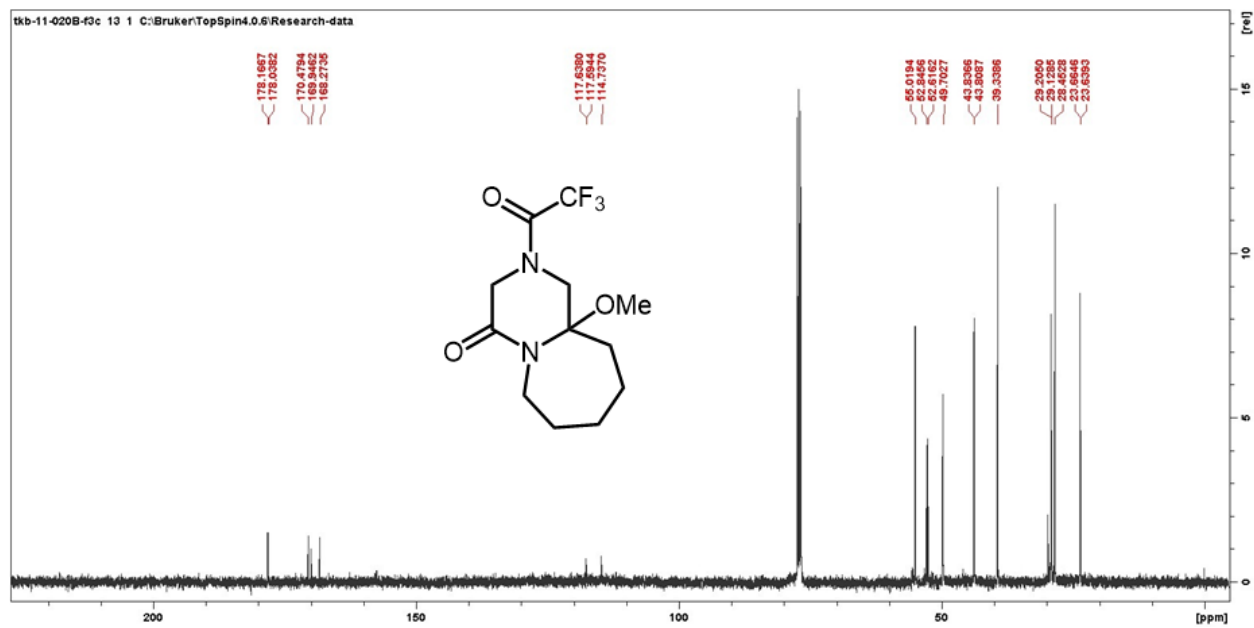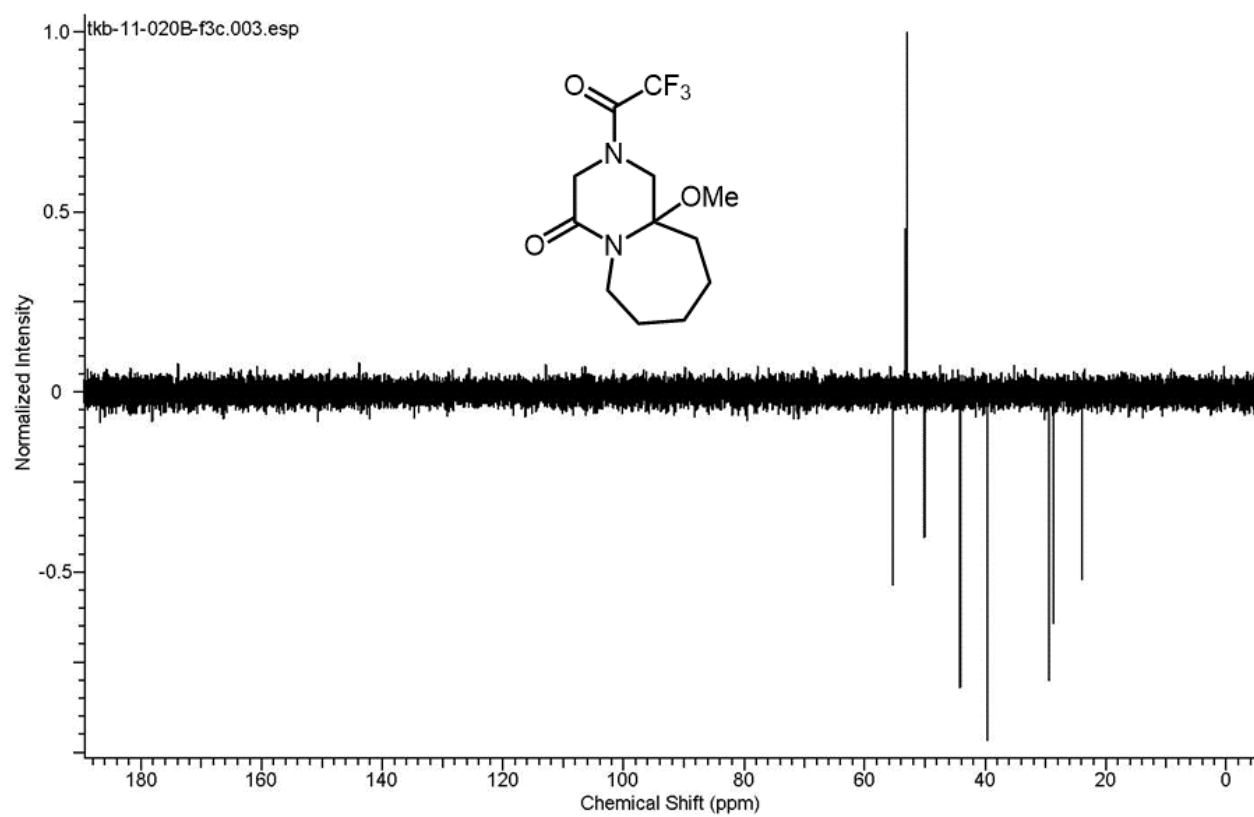

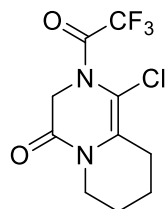**8c**, 85%

Prepared from **2c** (117.6 mg, 1.0 mmol) and anhydride **7** (211.1 mg, 1.0 equiv) using General Procedure B. T = 100 °C, time = 18 h. Purification: Flash chromatography on silica eluting with hexane/EtOAc (75:25). Yield = 240 mg, 85%. <sup>1</sup>H NMR (400 MHz, Chloroform-*d*) δ 4.65 (d, *J* = 1.6 Hz, 1H), 4.50 (s, 1H), 3.57 (dq, *J* = 10.2, 3.5 Hz, 2H), 2.41 (dq, *J* = 7.2, 3.0 Hz, 2H), 1.68-1.60 (m, 4H). <sup>13</sup>C NMR (101 MHz, CDCl<sub>3</sub>) δ 174.03, 174.01, 171.28, 171.13, 170.54, 170.07, 169.95, 157.83, 157.47, 157.33, 157.11, 120.50, 117.64, 114.78, 111.92, 55.70, 55.67, 55.52, 44.68, 44.60, 34.37, 34.34, 22.10, 22.08, 19.97, 19.87. **HRMS-EI<sup>+</sup>** (*m/z*): calc'd for C<sub>10</sub>H<sub>10</sub>ClF<sub>3</sub>N<sub>2</sub>O<sub>2</sub> 282.0383; found 282.0388.

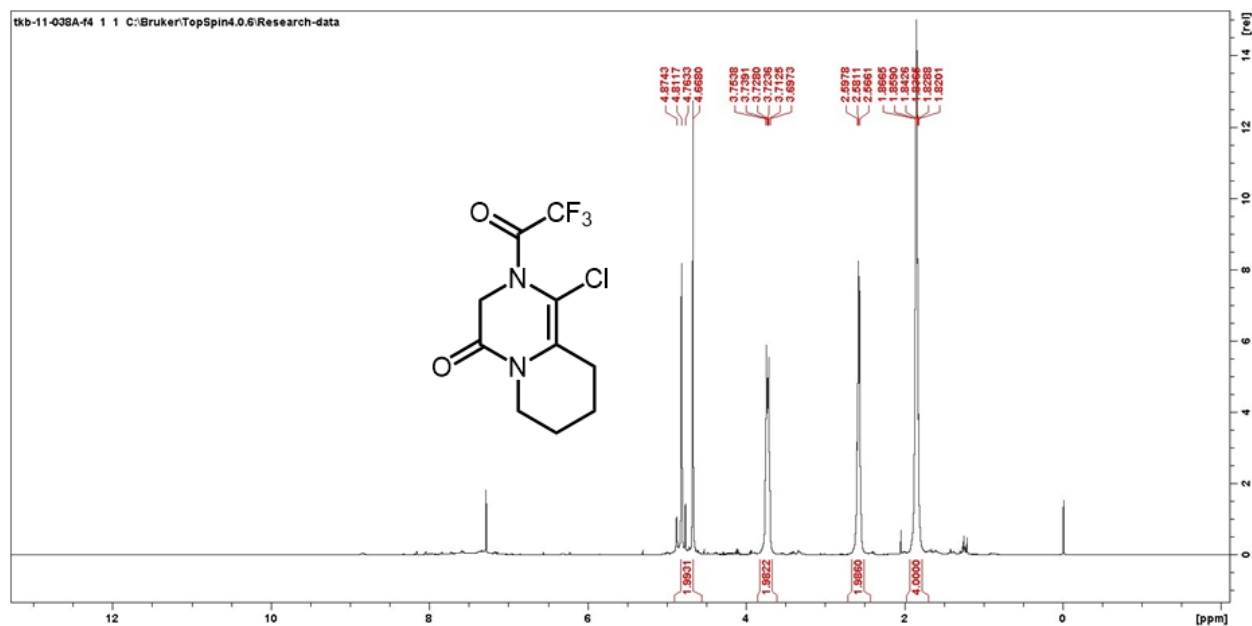

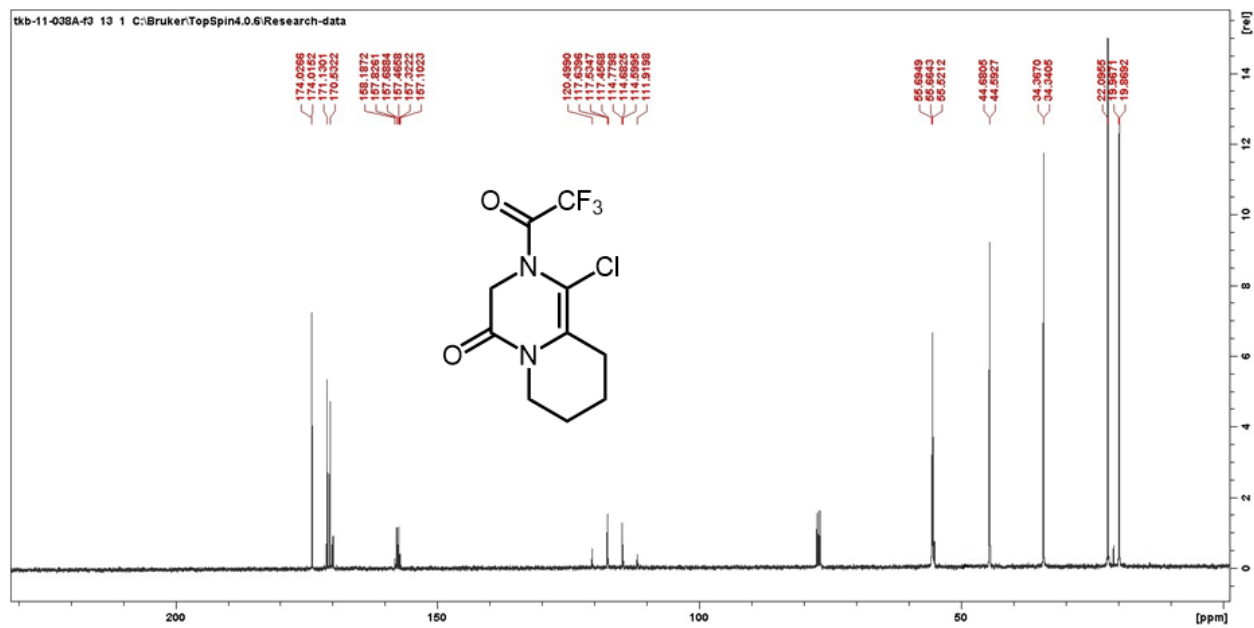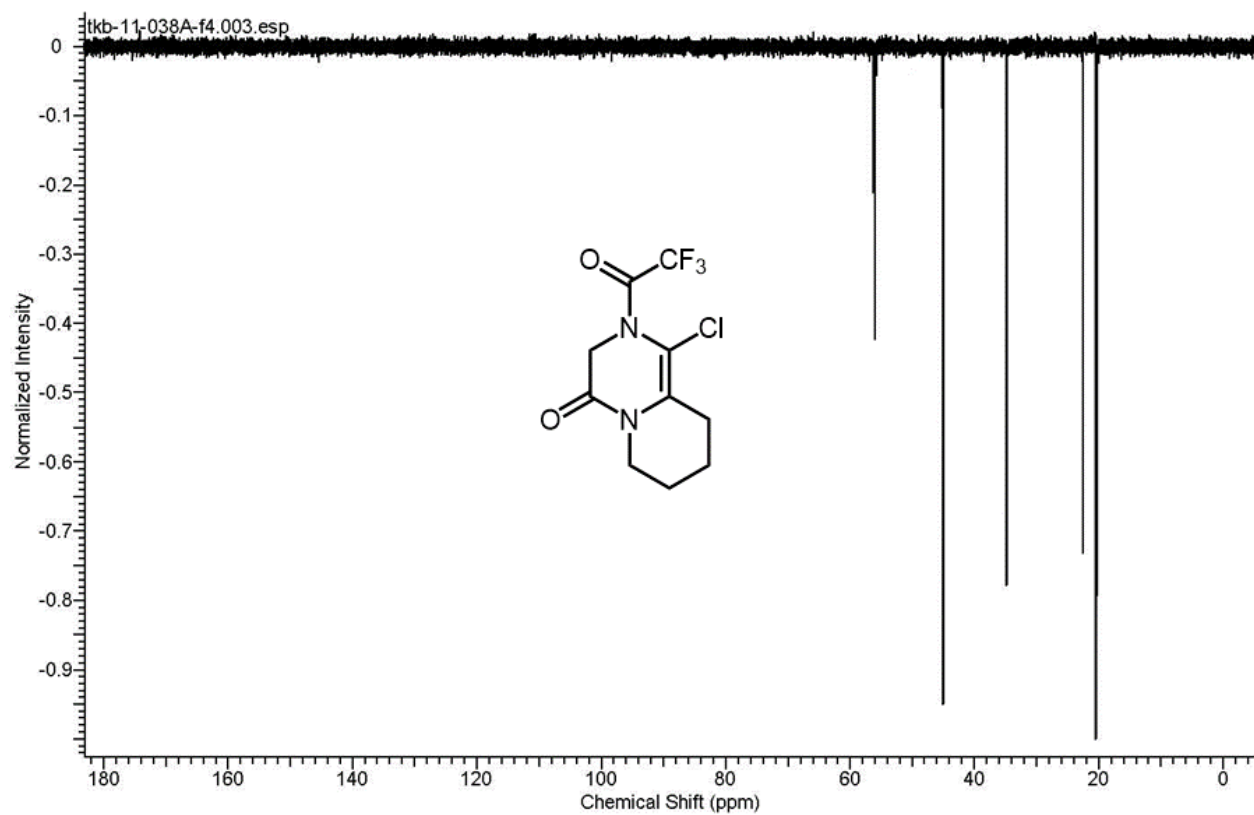

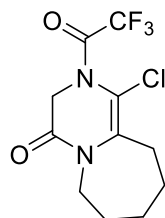**8d**, 87%

Prepared from **2d** (131.7 mg, 1.0 mmol) and anhydride **7** (211.1 mg, 1.0 equiv) using General Procedure B. T = 100 °C, time = 18 h. Purification: Flash chromatography on silica eluting with hexane/EtOAc (75:25). Yield = 258 mg, 87%. <sup>1</sup>H NMR (400 MHz, Chloroform-*d*) δ 4.60 (d, *J* = 1.8 Hz, 1H), 4.47 (s, 1H), 3.78 – 3.68 (m, 2H), 2.55 (dt, *J* = 10.9, 5.5 Hz, 2H), 1.60 – 1.51 (m, 6H). <sup>13</sup>C NMR (101 MHz, CDCl<sub>3</sub>) δ 178.14, 178.01, 170.56, 170.04, 157.74, 157.37, 120.59, 119.66, 117.72, 114.86, 112.00, 55.67, 55.60, 55.57, 43.76, 43.74, 39.31, 29.18, 29.08, 28.43, 23.65, 23.62. HRMS-EI<sup>+</sup> (*m/z*): calc'd for C<sub>11</sub>H<sub>12</sub>ClF<sub>3</sub>N<sub>2</sub>O<sub>2</sub> 296.0539; found 296.0545.

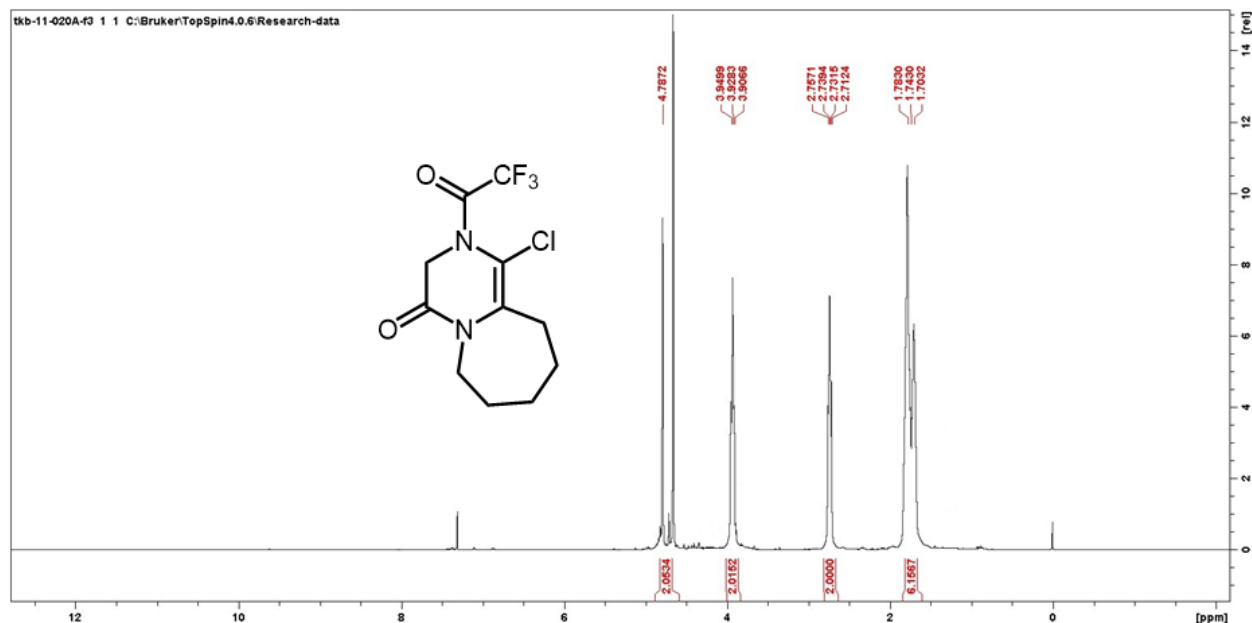

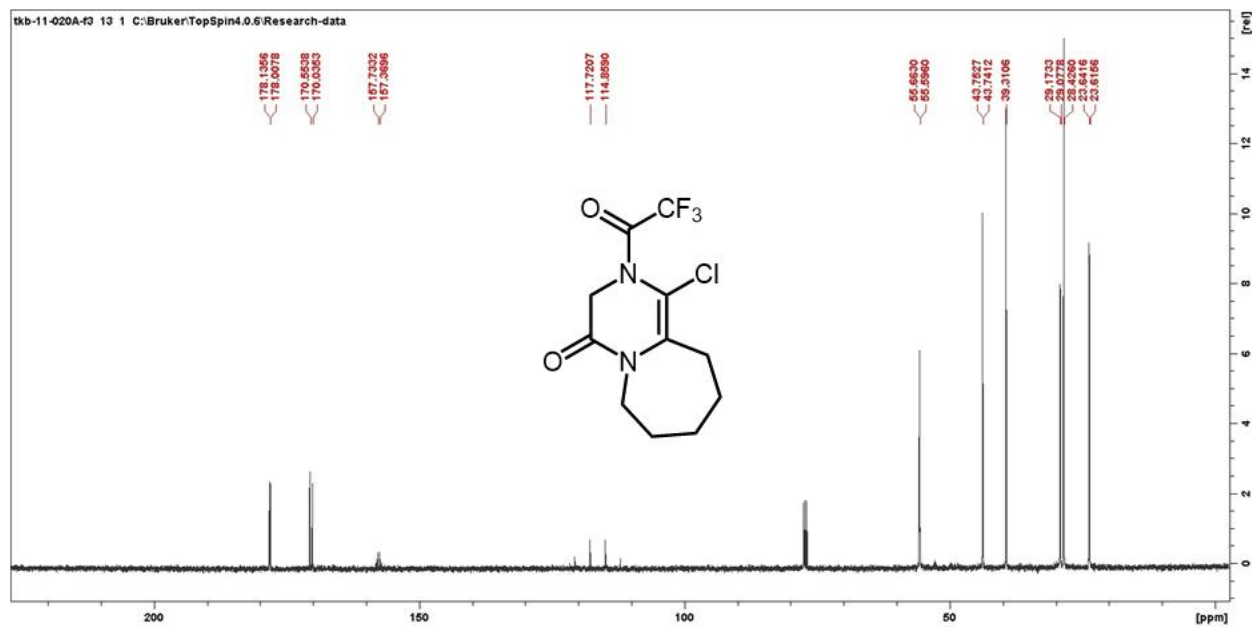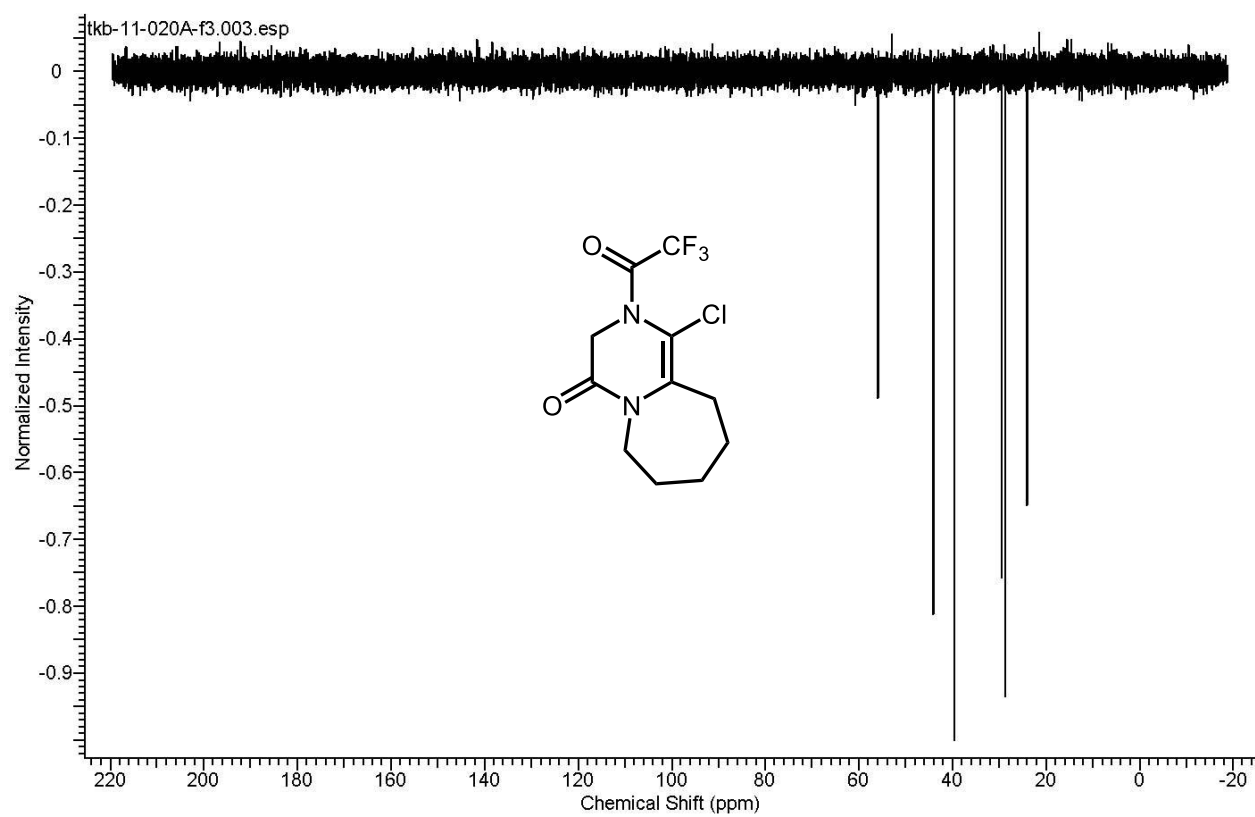

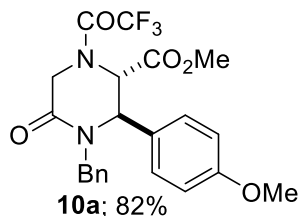

Prepared from the imine (225 mg, 1.0 mmol) and anhydride **7** (211.1 mg, 1.0 equiv) using General Procedure B. Purification: Flash chromatography on silica eluting with hexane/EtOAc (50:50). Yield = 369 mg, 82%, 95:5 dr.  $^1\text{H}$  NMR (400 MHz, Chloroform-*d*)  $\delta$  7.25 – 7.03 (m, 3H), 7.02 (ddd,  $J$  = 6.8, 4.6, 2.0 Hz, 2H), 6.97 – 6.87 (m, 2H), 6.81 – 6.71 (m, 2H), 5.44 (dd,  $J$  = 14.5, 11.7 Hz, 1H), 4.77 (dd,  $J$  = 10.3, 2.1 Hz, 1H), 4.54 – 4.39 (m, 2H), 4.20 – 4.09 (m, 1H), 3.64 (s, 3H), 3.35 – 3.19 (m, 4H).  $^{13}\text{C}$  NMR (101 MHz,  $\text{CDCl}_3$ )  $\delta$  167.1, 167.1, 163.8, 162.9, 160.2, 160.2, 157.3, 157.1, 156.7, 156.5, 156.3, 156.1, 155.9, 155.8, 155.4, 135.6, 135.4, 128.9, 128.8, 128., 128.56, 128.4, 128.2, 127.5, 127.3, 127.2, 127.1, 120.1, 119.8, 117.5, 117.3, 117.0, 115.2, 114.9, 114.9, 111.5, 111.2, 61.1, 59.1, 58.3, 55.4, 53.2, 53.0, 52.8, 52.6, 48.8, 48.2, 46.6, 46.0. **HRMS- $\text{EI}^+$**  ( $m/z$ ): calc'd for  $\text{C}_{22}\text{H}_{21}\text{F}_3\text{N}_2\text{O}_5$  450.1403; found 450.1408.



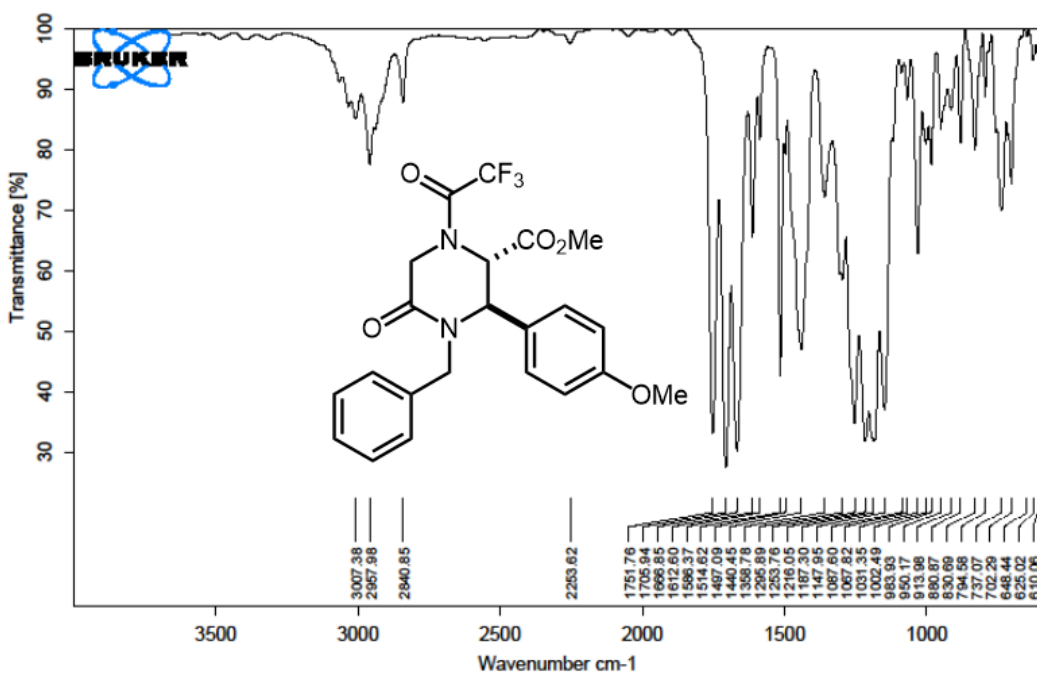

C:\Users\Public\Documents\Bruker\OPUS\_7.5.18\DATA\MEAS\TKB-11-027C-f2.0 TKB-11-027C-f2 Instrument type and / or accessory 10/14/2018

Page 1/1

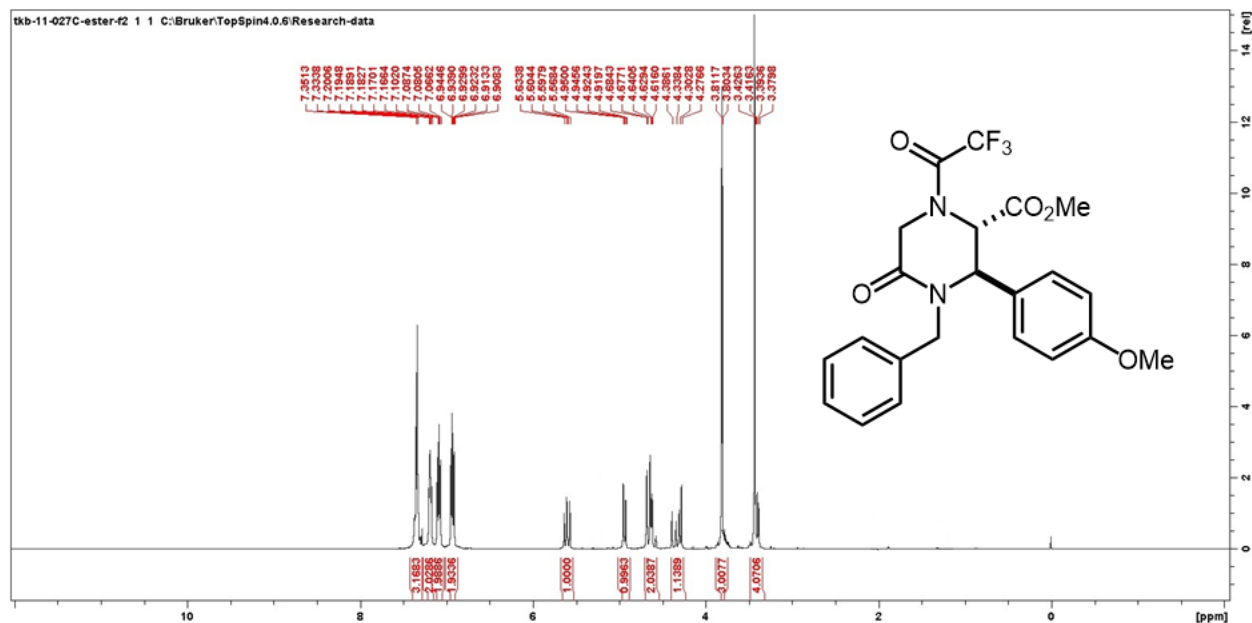

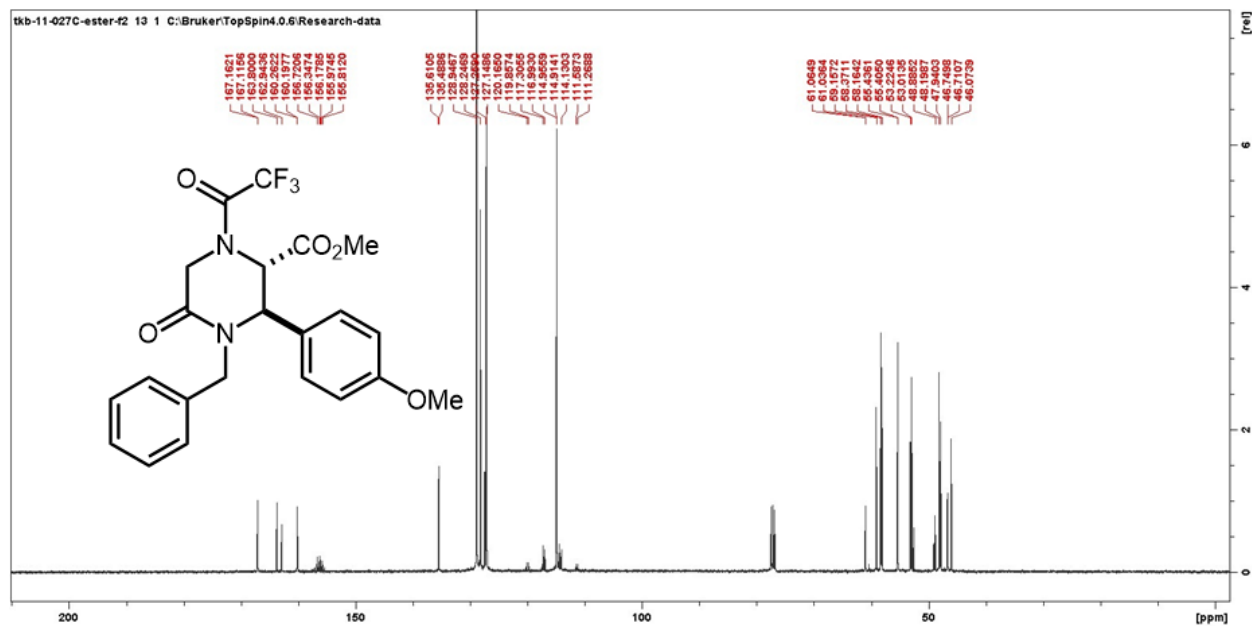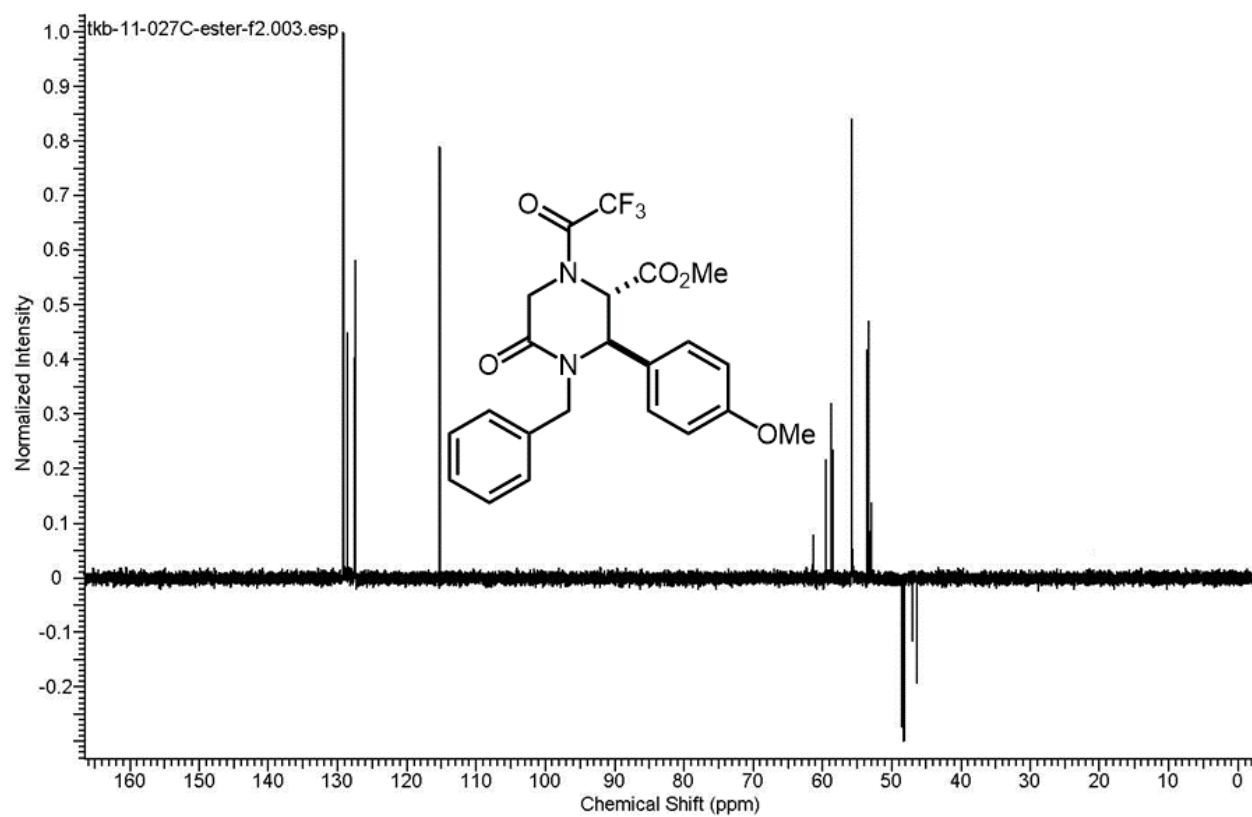

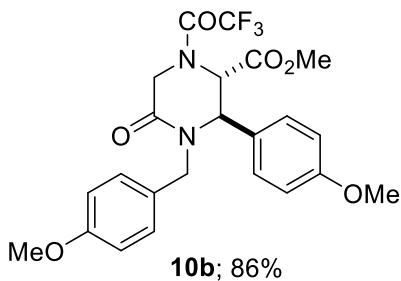

Prepared in 1 mmol scale using General Procedure B. Purification: Flash chromatography on silica eluting with hexane/EtOAc (25:75). Yield = 413 mg, 86%, 95:5 dr.  $^1\text{H}$  NMR (400 MHz, Chloroform-*d*, mixture of rotamers)  $\delta$  6.90 – 6.83 (m, 4H), 6.78 – 6.61 (m, 4H), 5.33 (dd,  $J = 14.4$ , 11.2 Hz, 1H), 4.76 (dd,  $J = 9.2$ , 2.1 Hz, 1H), 4.52 – 4.34 (m, 2H), 4.14 – 4.06 (m, 1H), 3.70 – 3.51 (m, 6H), 3.27 (s, 3H), 3.18 (dd,  $J = 14.4$ , 5.1 Hz, 1H).  $^{13}\text{C}$  NMR (101 MHz,  $\text{CDCl}_3$ , mixture of rotamers)  $\delta$  168.1, 168.0, 167.1, 167.1, 163.6, 162.8, 160.2, 160.1, 159.6, 156.6, 156.2, 156.1, 155.7, 130.2, 130.2, 127.5, 127.5, 127.4, 127.2, 127.1, 127.1, 117.3, 116.9, 114.8, 114.1, 61.0, 58.9, 58.1, 55.3, 55.3, 53.2, 53.0, 52.8, 52.5, 48.9, 47.3, 46.6, 46.0. **HRMS-EI<sup>+</sup>** ( $m/z$ ): calc'd for  $\text{C}_{23}\text{H}_{23}\text{F}_3\text{N}_2\text{O}_6$  480.1508; found 480.1514.

File : C:\GCMS\Beng Research\Data\TKB-11-030A-F2.D  
 Operator : Beng  
 Acquired : 31 Oct 2018 17:11 using AcqMethod 150-250\_NEW.M  
 Instrument : Instrument #1  
 Sample Name:  
 Misc Info :  
 Vial Number: 1

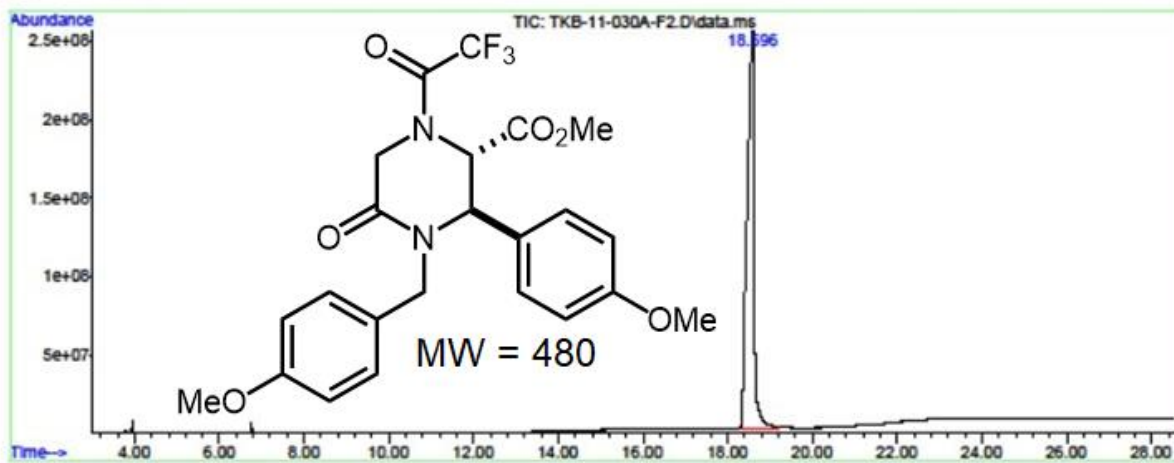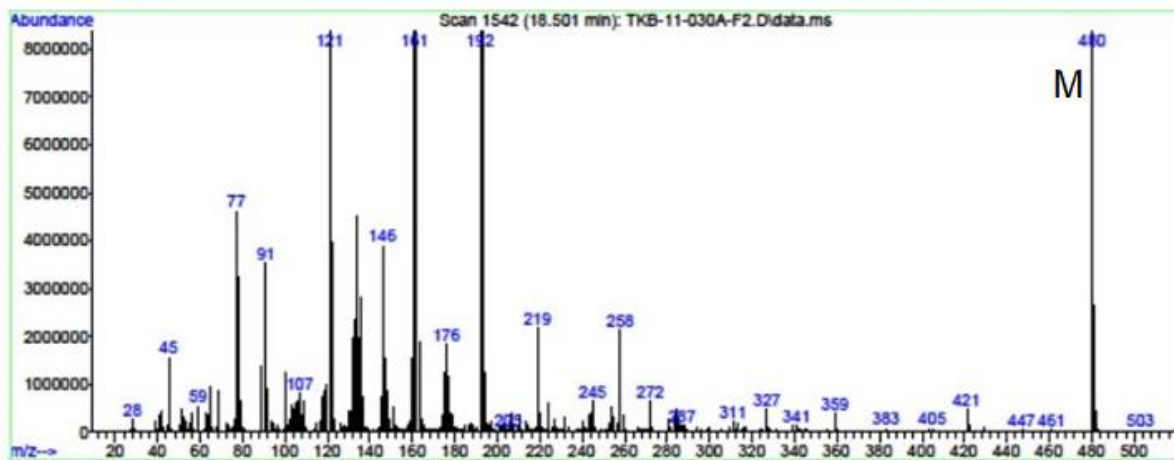

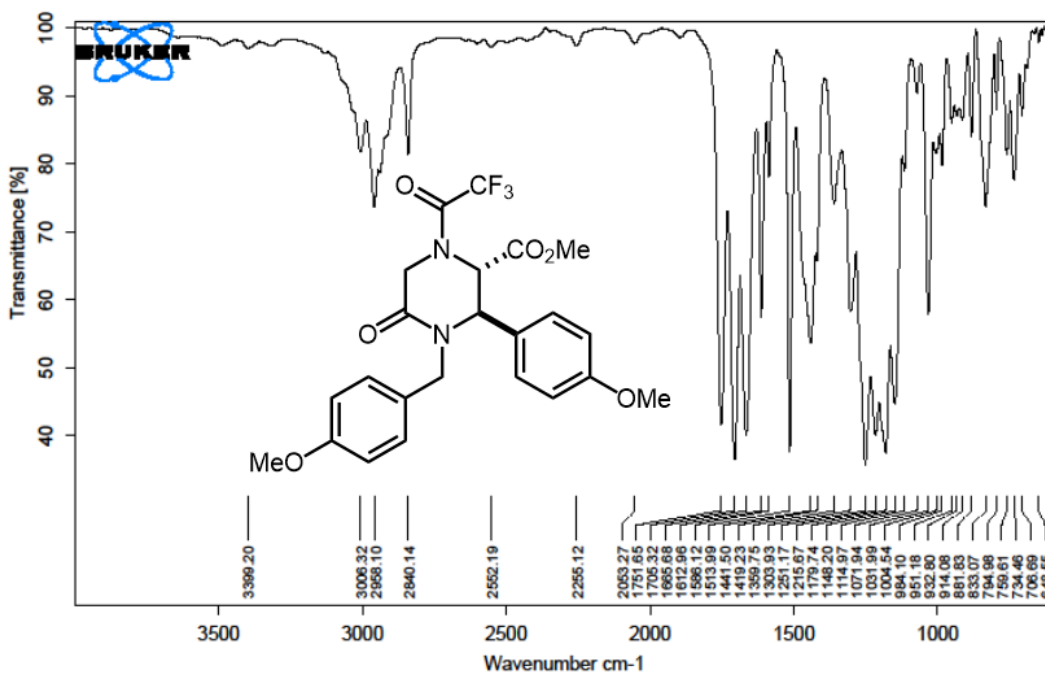

C:\Users\Public\Documents\Bruker\OPUS\_7.5.18\DATA\MEAS\TKB-11-030A-f2.0    TKB-11-030A-f2    Instrument type and / or accessory    10/14/2018

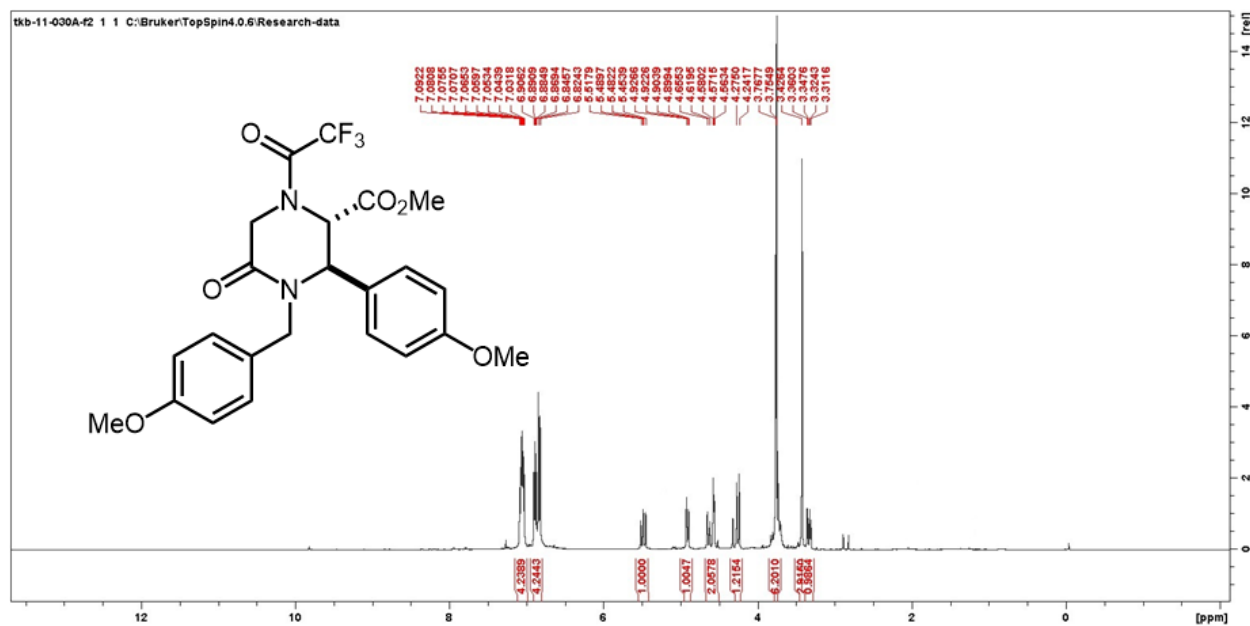

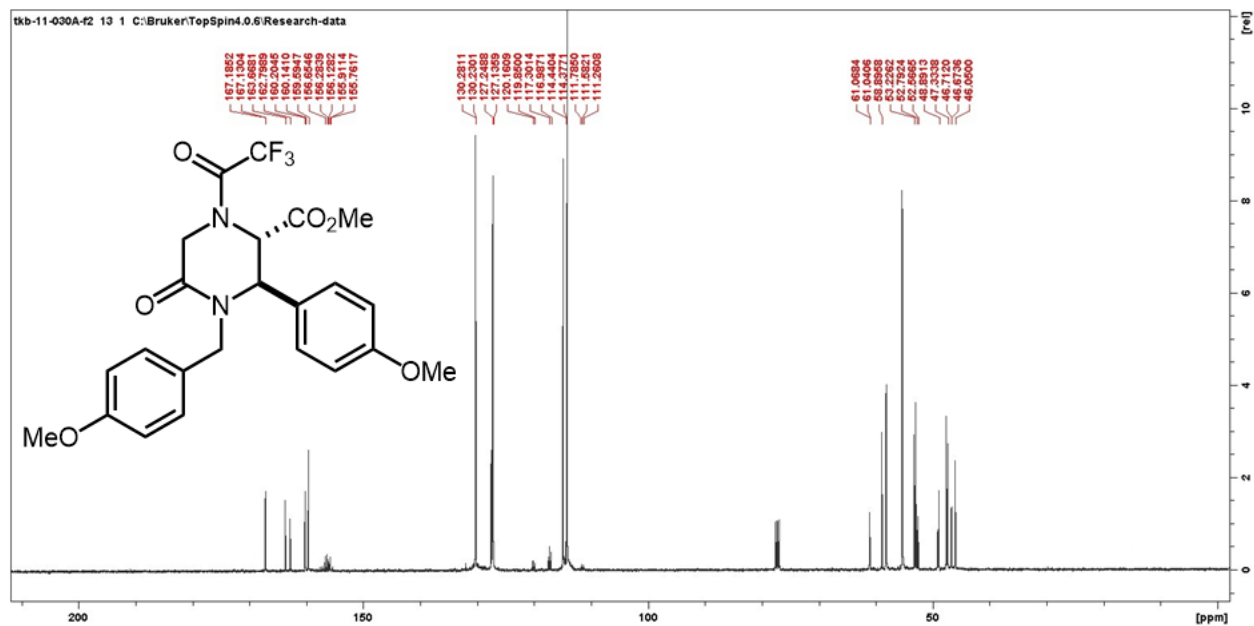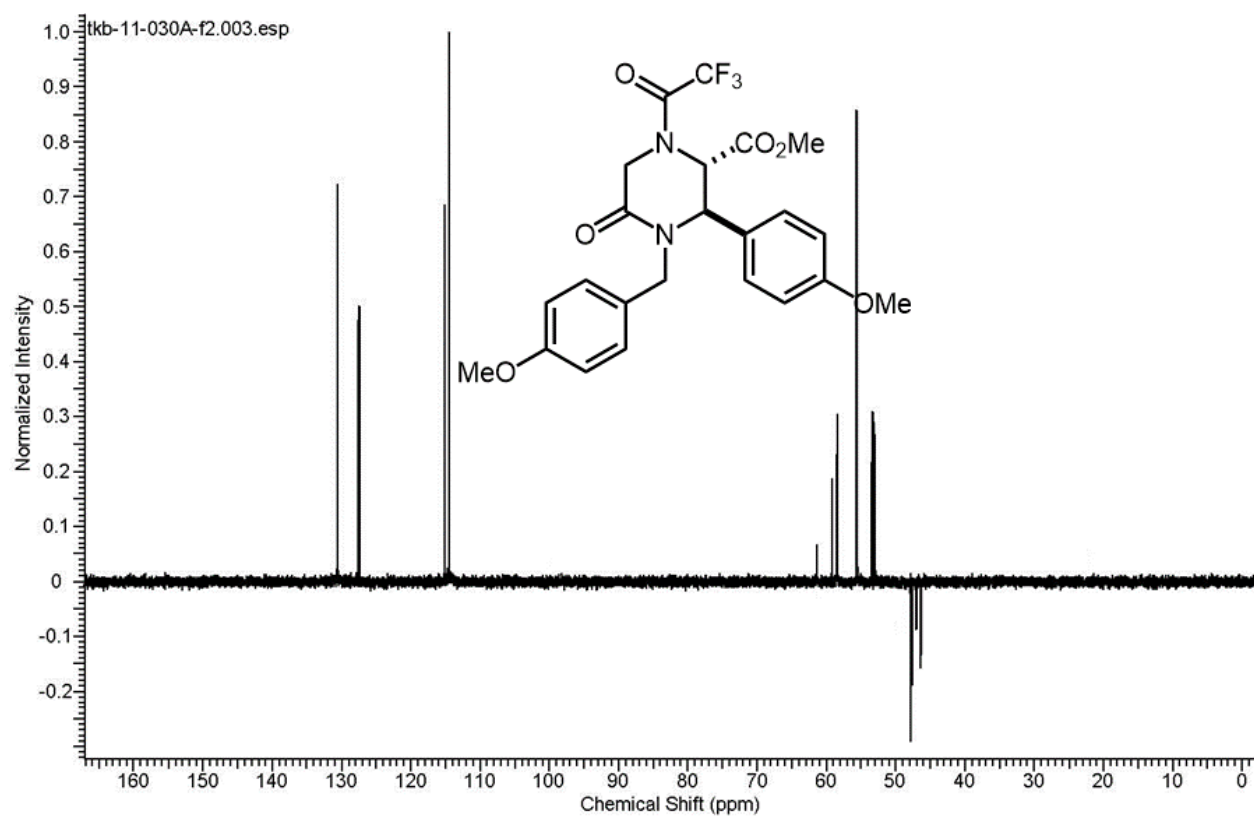

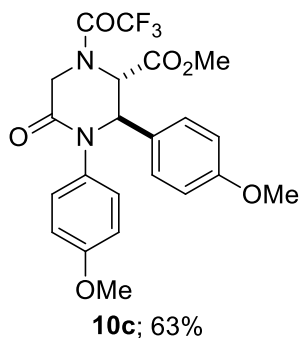

Prepared in 1 mmol scale using General Procedure B. Purification: Flash chromatography on silica eluting with hexane/EtOAc (25:75). Yield = 294 mg, 63%, 95:5 dr.  $^1\text{H}$  NMR (400 MHz, Chloroform-*d*, rotamers)  $\delta$  7.02 (dd,  $J = 8.7, 3.6$  Hz, 6H), 6.93 – 6.83 (m, 2H), 6.81 – 6.71 (m, 2H), 6.75 – 6.61 (m, 2H), 5.31 (dd,  $J = 10.8, 2.3$  Hz, 1H), 4.56 (dd,  $J = 18.6, 10.5$  Hz, 1H), 4.43 (d,  $J = 17.9$  Hz, 1H), 3.73 – 3.60 (m, 10H).  $^{13}\text{C}$  NMR (101 MHz,  $\text{CDCl}_3$ )  $\delta$  167.9, 167.7, 163.7, 162.9, 160.1, 160.0, 159.0, 159.0, 156.7, 156.31, 155.9, 133.2, 133.1, 128.1, 127.8, 127.5, 127.4, 121.6, 117.3, 114.7, 114.21, 114.1, 67.1, 64.8, 63.9, 61.8, 61.7, 58.8, 55.5, 55.3, 54.0, 53.7, 47.1, 46.5. **HRMS-EI<sup>+</sup>** ( $m/z$ ): calc'd for  $\text{C}_{22}\text{H}_{21}\text{F}_3\text{N}_2\text{O}_6$  466.1352; found 466.1358.

File :C:\GCMS\Beng Research\Data\AM-2-046B-ESTER-F5.D  
 Operator : Beng  
 Acquired : 9 Nov 2018 20:18 using AcqMethod 150-250\_NEW.M  
 Instrument : Instrument #1  
 Sample Name:  
 Misc Info :  
 Vial Number: 1

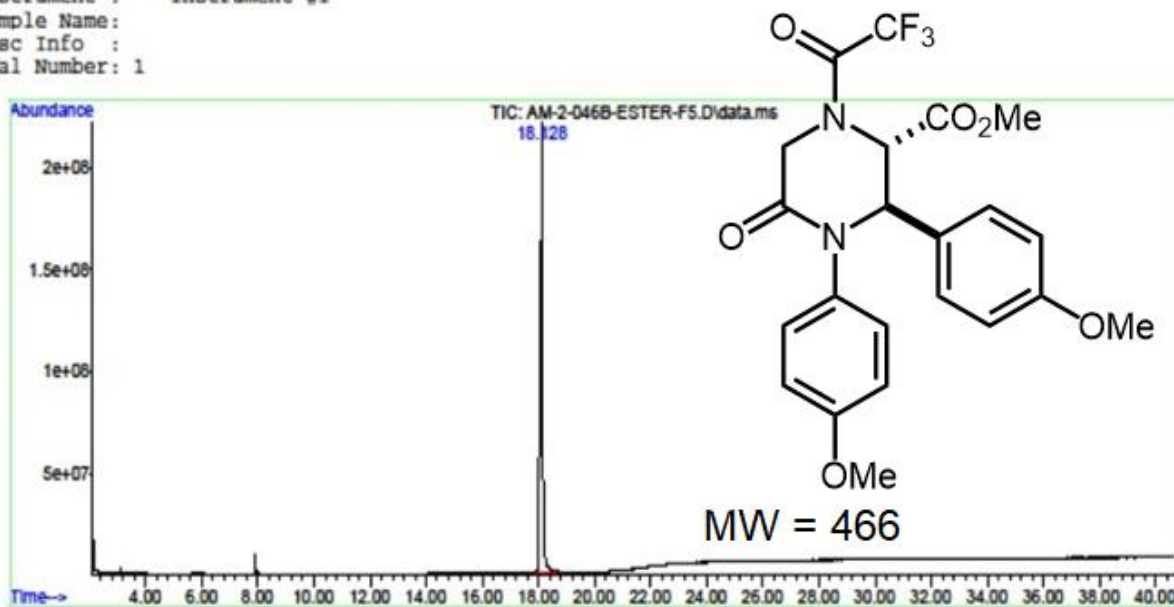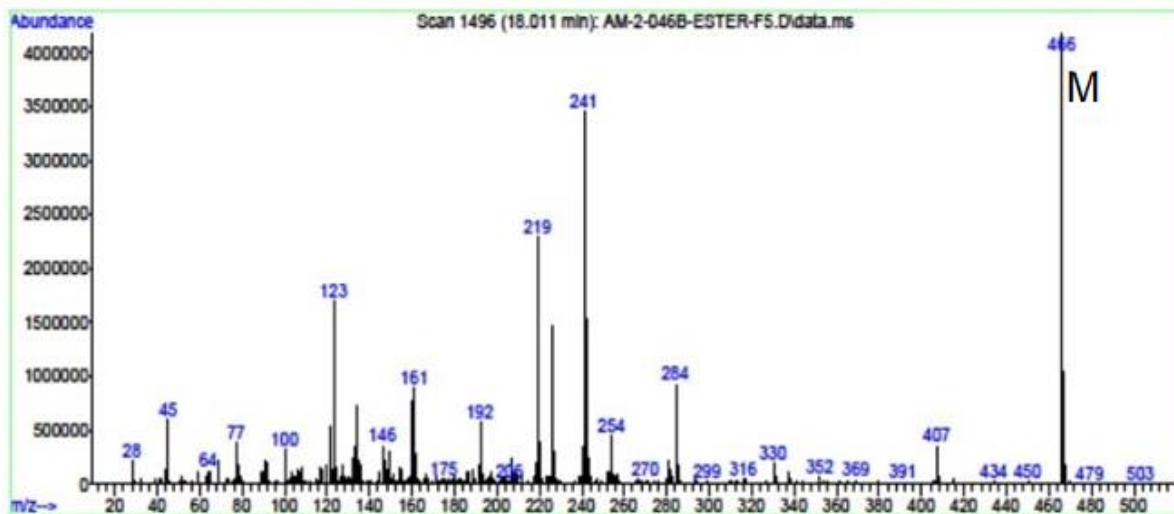



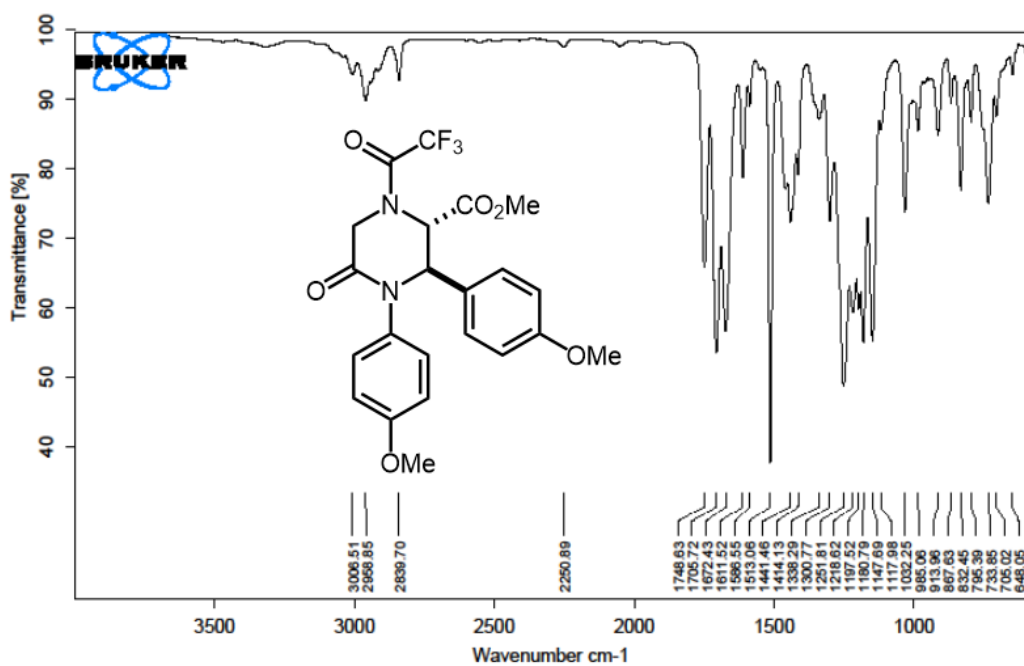

C:\Users\Public\Documents\Bruker\OPUS\_7.5.18\DATA\MEAS\AM-02-046B-ester-F5\_0 AM-02-046B-ester-F5 Instrument type and / or acc 11/10/2018

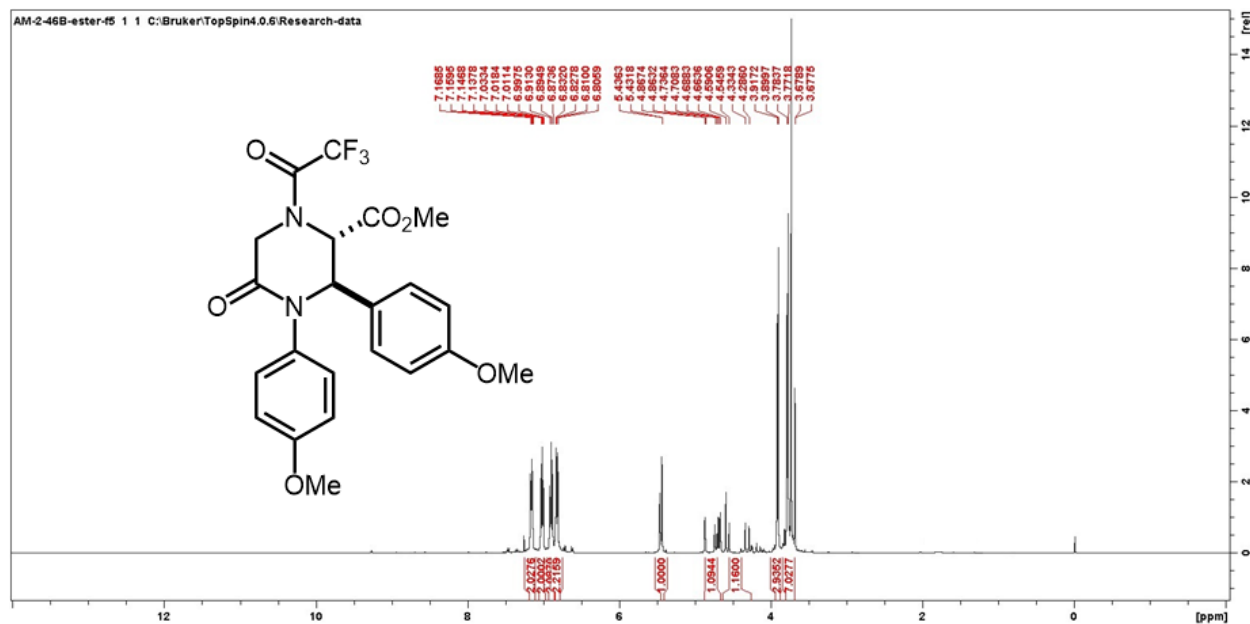

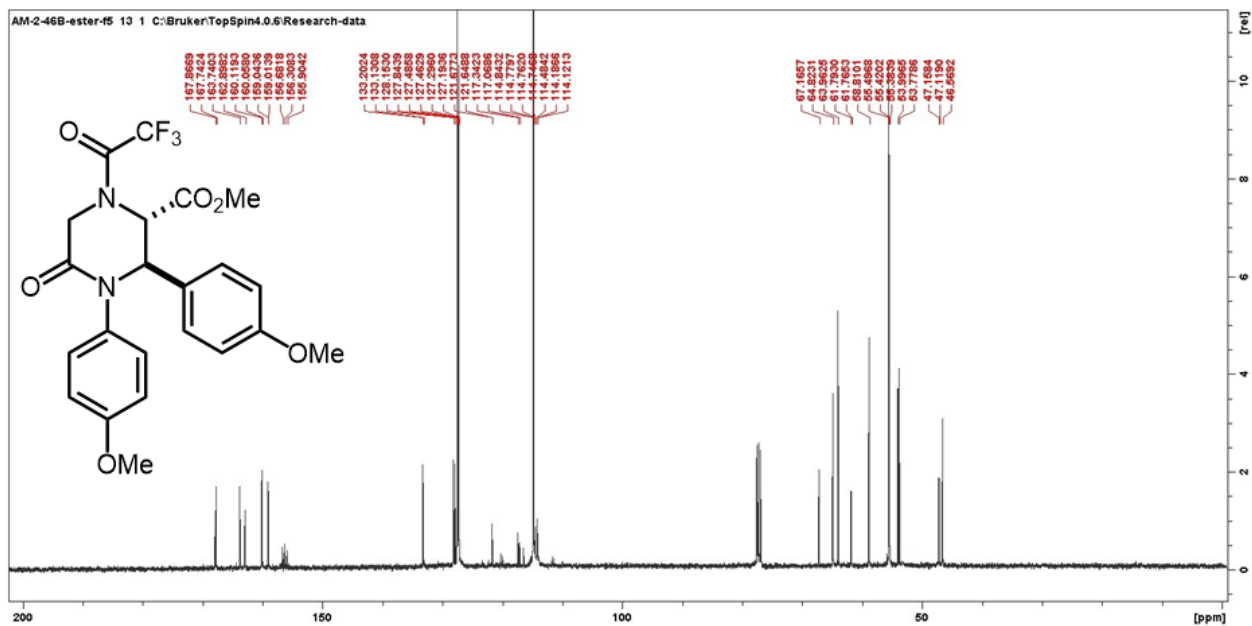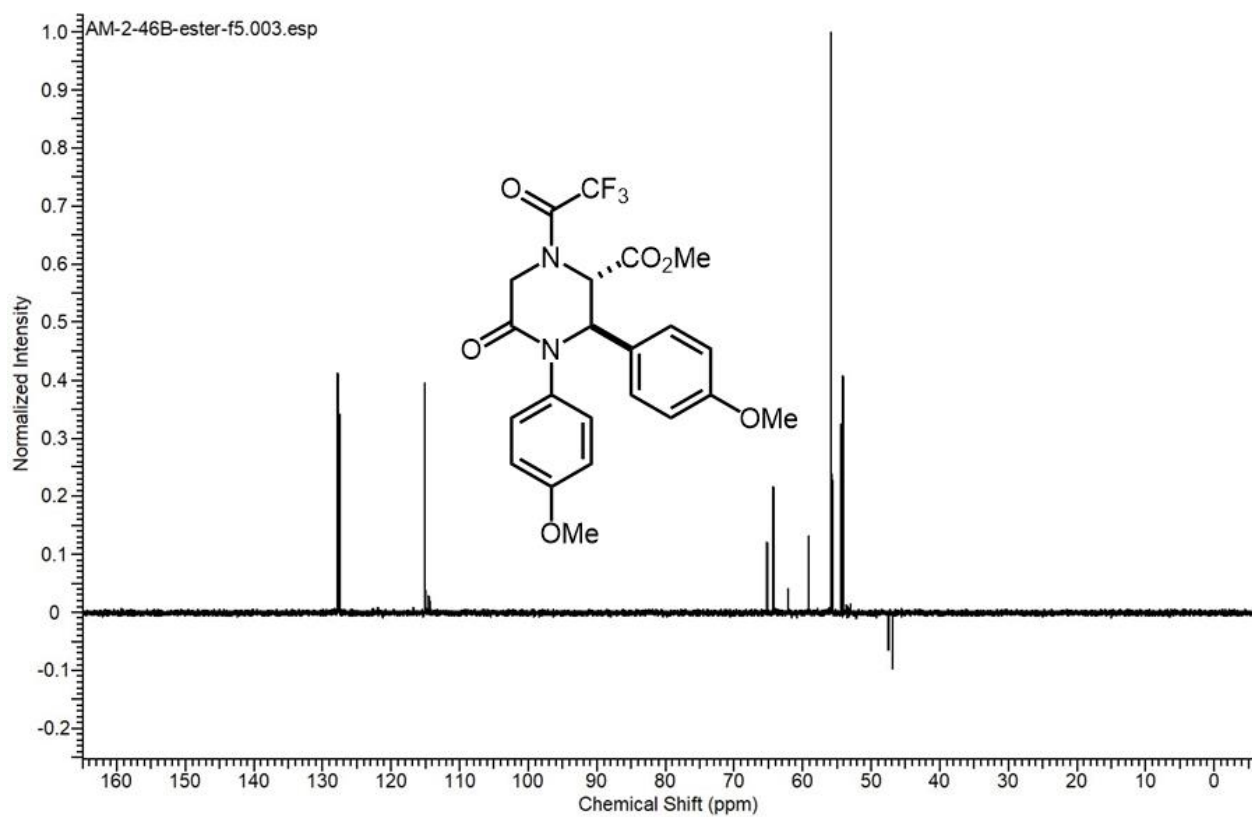

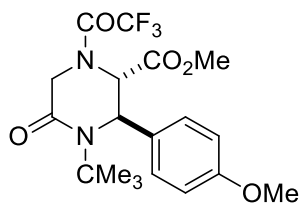**10d**; 77%

Prepared in 1 mmol scale using General Procedure B. Purification: Flash chromatography on silica eluting with hexane/EtOAc (75:25). Yield = 320 mg, 77%, 95:5 dr. <sup>1</sup>H NMR (400 MHz, Chloroform-*d*) δ 7.08 (dd, *J* = 8.6, 4.8 Hz, 2H), 6.86 (dd, *J* = 8.5, 4.4 Hz, 2H), 5.48 (dd, *J* = 9.0, 2.9 Hz, 1H), 5.24 + 4.76 (d, *J* = 2.8 Hz, 1H), 4.32 – 4.11 (m, 2H), 3.89 – 3.68 (m, 6H), 1.36 (s, 9H). <sup>13</sup>C NMR (101 MHz, CDCl<sub>3</sub>) δ 167.9, 167.7, 164.2, 163.2, 159.75, 159.68, 155.94, 155.65, 132.0, 129.6, 129.2, 128.6, 126.8, 117.2, 114.7, 62.7, 60.0, 59.5, 59.3, 58.5, 57.5, 55.3, 53.6, 53.4, 48.0, 47.9, 47.7, 28.7, 27.9. **HRMS-EI<sup>+</sup>** (*m/z*): calc'd for C<sub>19</sub>H<sub>23</sub>F<sub>3</sub>N<sub>2</sub>O<sub>5</sub> 416.1559; found 416.1567.

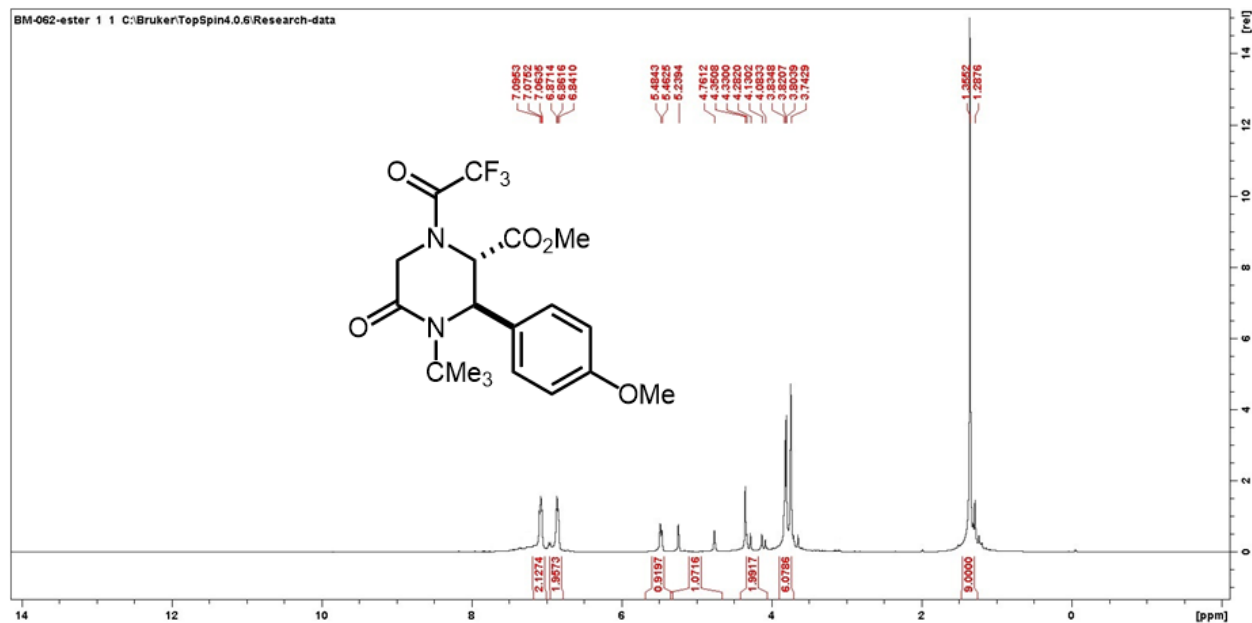

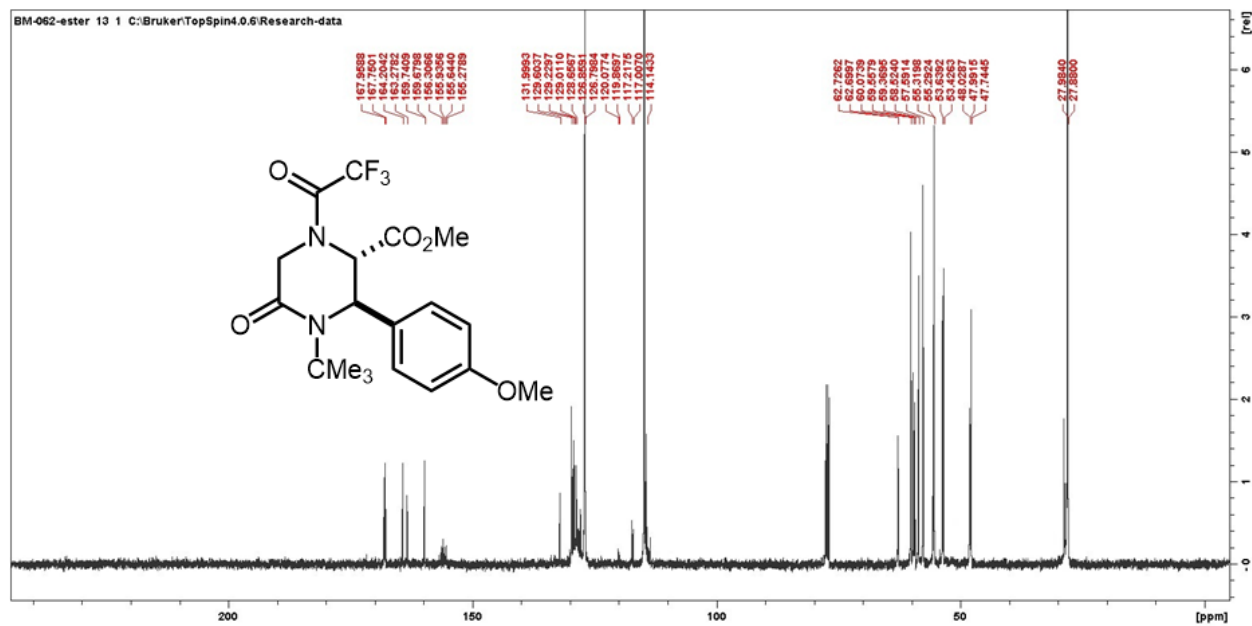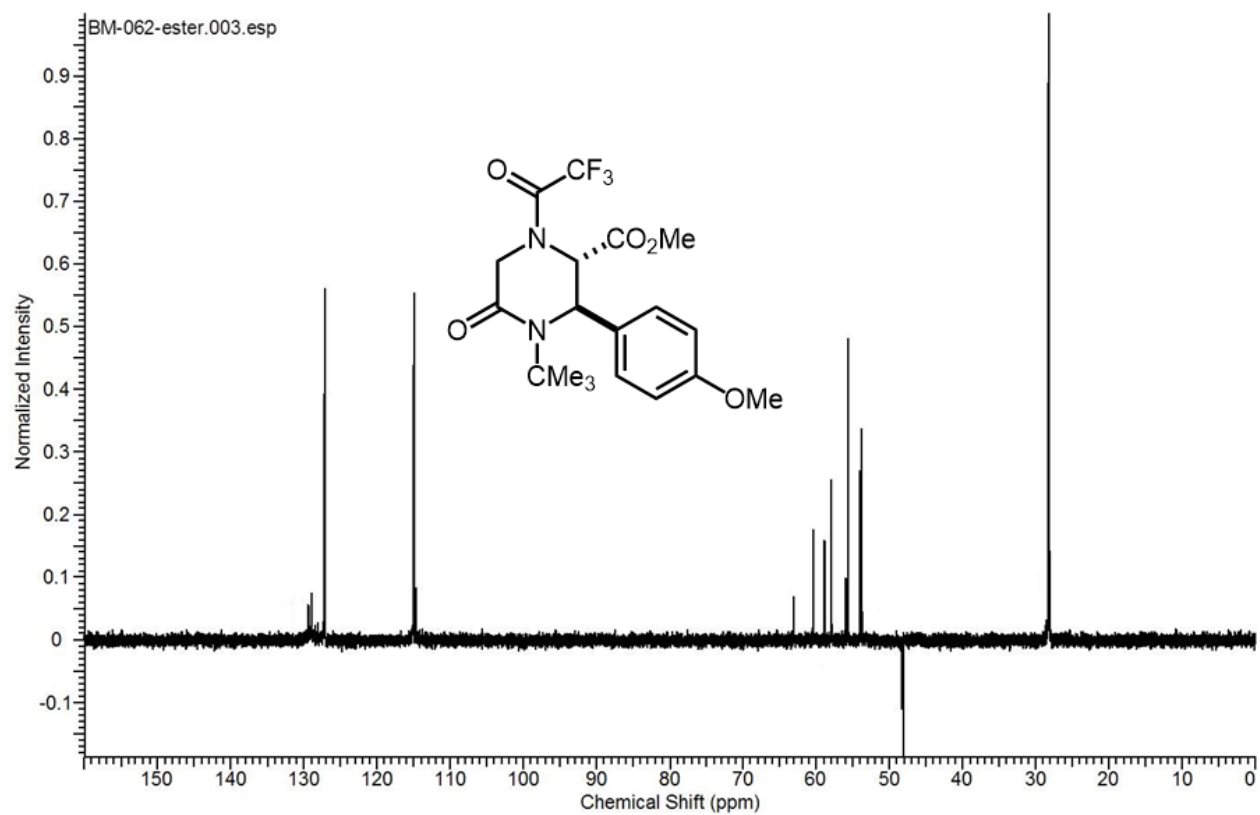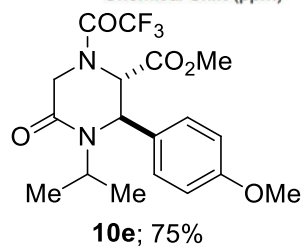

Prepared in 1 mmol scale using General Procedure B. Purification: Flash chromatography on silica eluting with hexane/EtOAc (60:40). Yield = 302 mg, 75%, 95:5 dr.  $^1\text{H}$  NMR (400 MHz, Chloroform-*d*, rotamers) 7.06 (dd,  $J = 8.5, 5.5$  Hz, 2H), 6.98 – 6.79 (m, 2H), 5.27 – 5.21 (m, 1H), 5.13 (dd,  $J = 12.8, 2.5$  Hz, 1H), 4.82 – 4.64 (m, 1H), 4.43 (d,  $J = 12.3$  Hz, 1H), 3.82 – 3.69 (m, 6H), 1.08 (t,  $J = 6.7$  Hz, 3H), 0.83 (d,  $J = 6.9$  Hz, 3H).  $^{13}\text{C}$  NMR (101 MHz,  $\text{CDCl}_3$ )  $\delta$  167.6, 167.4, 163.3, 162.4, 159.7, 156.5, 156.2, 155.6, 131.9, 130.9, 129.8, 129.4, 128.4, 126.84, 126.7, 117.2, 116.9, 114.1, 113.3, 58.0, 56.4, 55.6, 55.3, 53.6, 53.3, 47.0, 47.0, 46.9, 46.6, 46.6, 46.1, 19.7, 19.7, 19.5, 19.5. **HRMS-EI<sup>+</sup>** ( $m/z$ ): calc'd for  $\text{C}_{18}\text{H}_{21}\text{F}_3\text{N}_2\text{O}_5$  402.1403; found 402.1409.

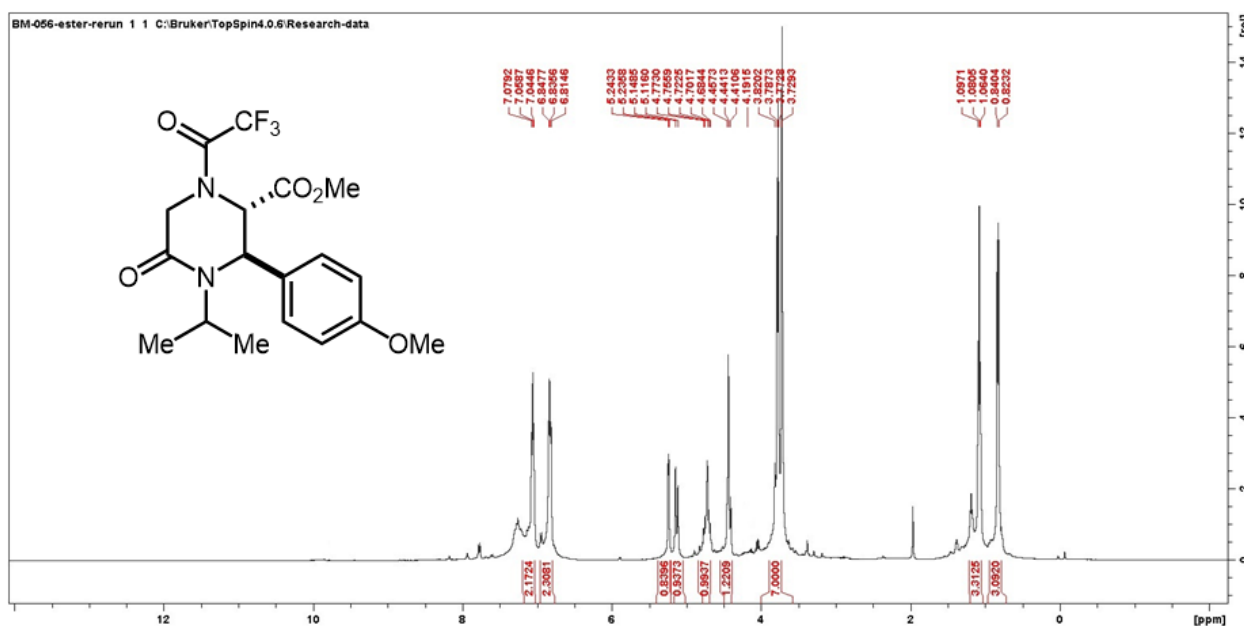

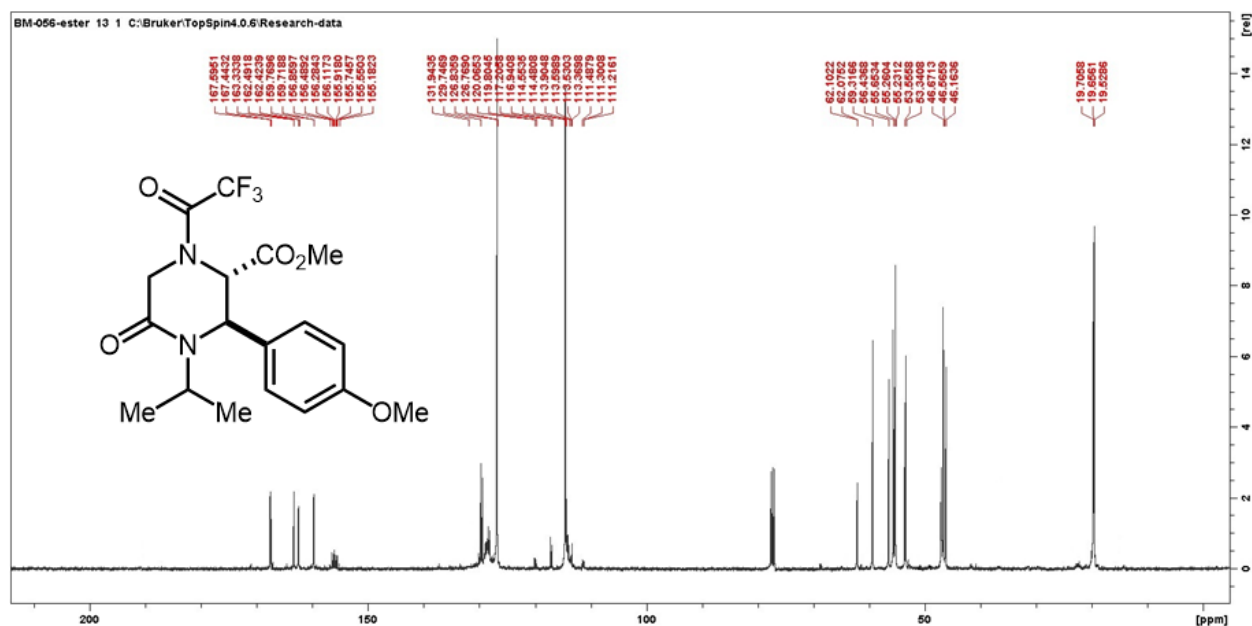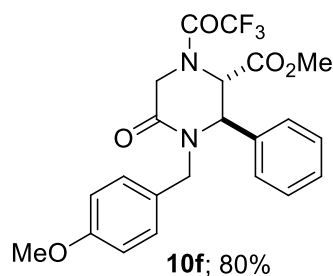

Prepared in 1 mmol scale using General Procedure B. Purification: Flash chromatography on silica eluting with hexane/EtOAc (50:50). Yield = 360 mg, 80%, 95:5 dr.  $^1\text{H}$  NMR (400 MHz, Chloroform-*d*)  $\delta$  7.22 – 7.19 (m, 3H), 7.17 – 6.95 (m, 2H), 7.06 – 6.87 (m, 2H), 6.71 (d,  $J$  = 8.3 Hz, 2H), 5.37 (dd,  $J$  = 14.4, 10.4 Hz, 1H), 4.83 (dd,  $J$  = 10.4, 2.0 Hz, 1H), 4.55 – 4.46 (m, 2H), 4.12 (d,  $J$  = 11.3 Hz, 2H), 3.51 (s, 3H), 3.31 (s, 3H), 3.21 (dd,  $J$  = 14.5, 4.9 Hz, 1H).  $^{13}\text{C}$  NMR (101 MHz,  $\text{CDCl}_3$ )  $\delta$  168.1, 167.1, 163.8, 162.9, 159.6, 157.6, 156.7, 156.3, 155.7, 135.8, 135.4, 130.3, 129.6, 129.1, 127.4, 125.9, 117.27, 114.6, 114.0, 60.9, 59.4, 58., 55.39, 53.3, 52.8, 49.1, 48.9, 47.7, 46.7, 46.7, 46.1. **HRMS-EI $^+$**  ( $m/z$ ): calc'd for  $\text{C}_{22}\text{H}_{21}\text{F}_3\text{N}_2\text{O}_5$  450.1403; found 450.1408.



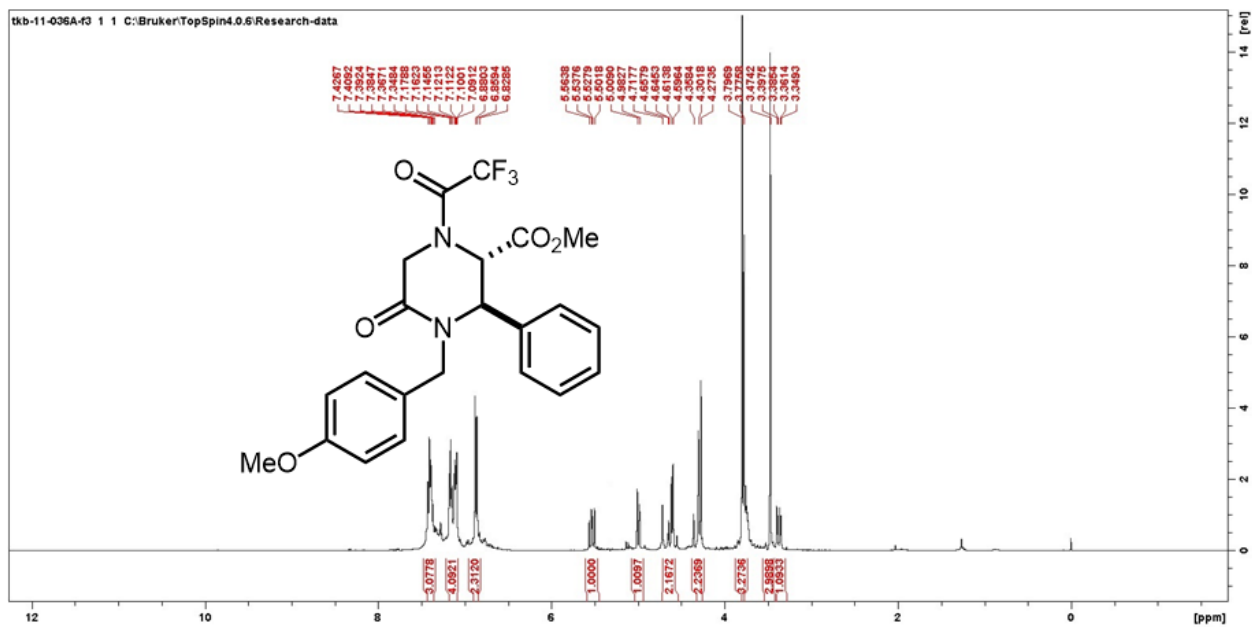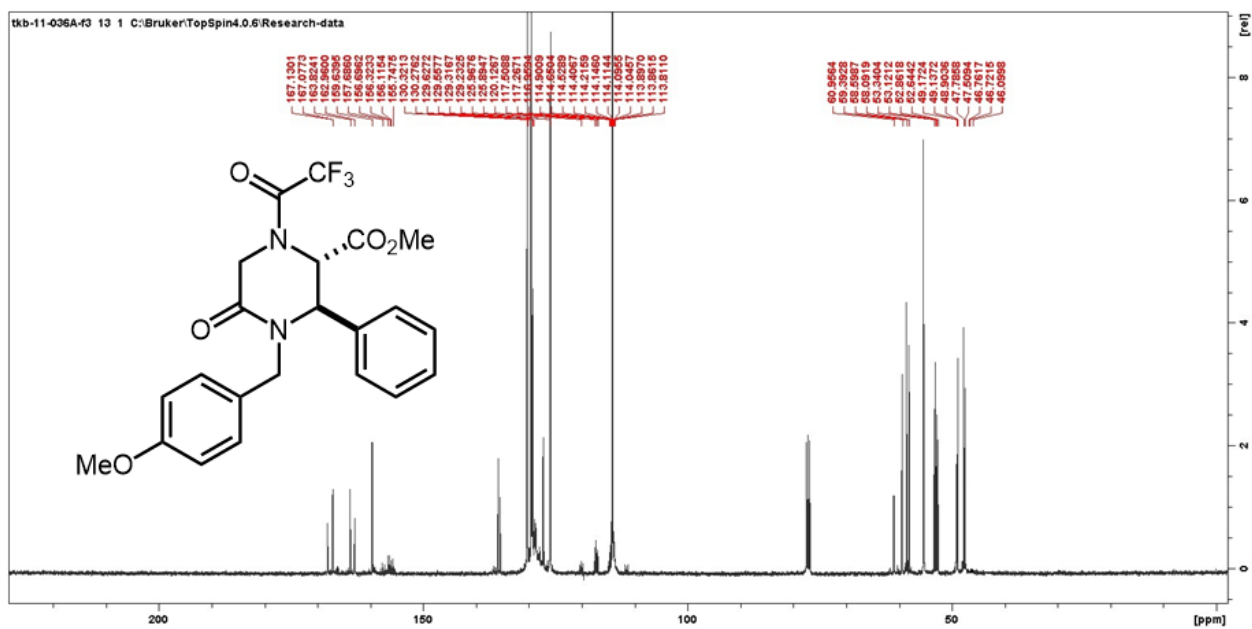



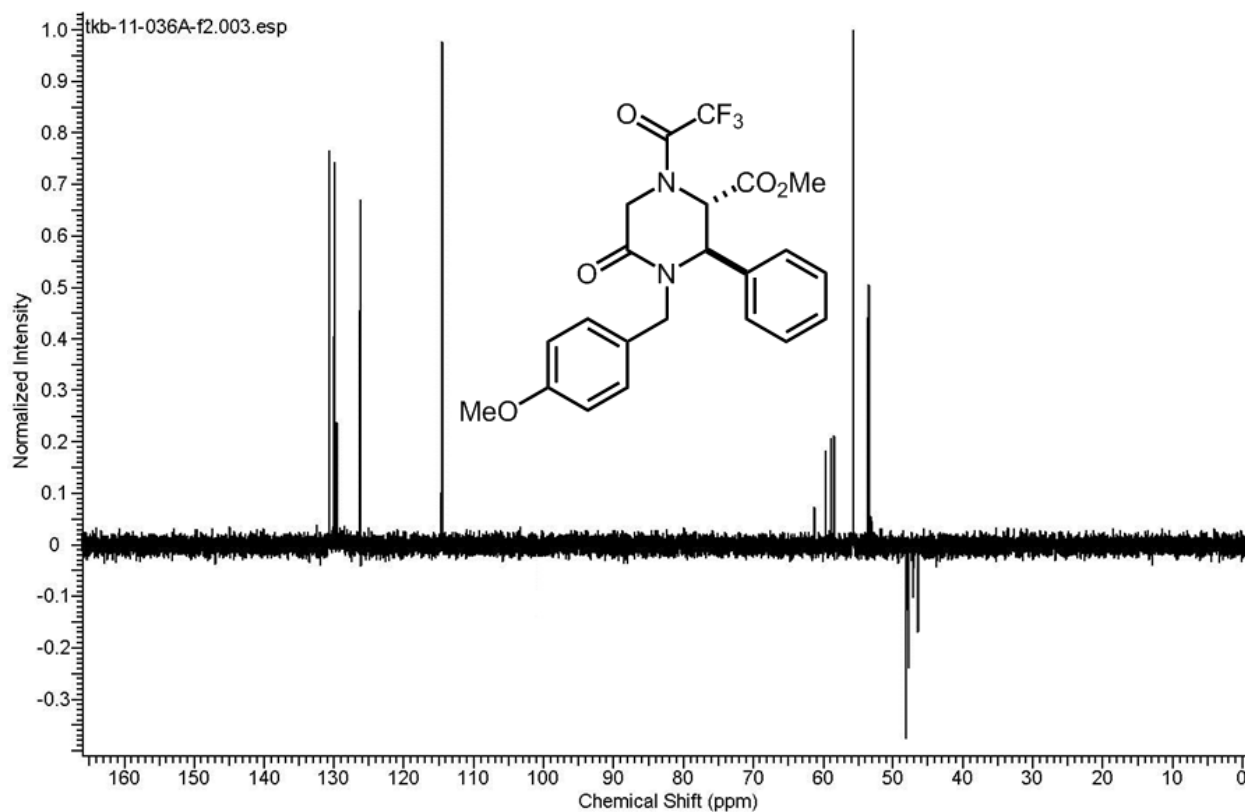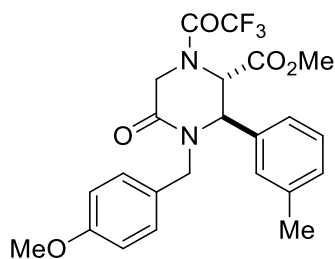**10g**; 84%

Prepared in 1 mmol scale using General Procedure B. Purification: Flash chromatography on silica eluting with hexane/EtOAc (50:50). Yield = 390 mg, 84%, 95:5 dr.  $^1\text{H}$  NMR (400 MHz, Chloroform-*d*, rotamers)  $\delta$  7.16 – 7.06 (s, 1H), 6.98 – 6.85 (m, 3H), 6.73 – 6.55 (m, 4H), 5.36 (t,  $J$  = 14.7 Hz, 1H), 5.12 – 5.04 (m, 1H), 4.78 (dd,  $J$  = 5.3, 2.1 Hz, 1H), 4.52 – 4.29 (m, 2H), 3.54 (m, 3H), 3.28 (s, 3H), 3.20 (d,  $J$  = 14.4 Hz, 1H), 2.17 (s, 3H).  $^{13}\text{C}$  NMR (101 MHz,  $\text{CDCl}_3$ )  $\delta$  167.2, 167.1, 163.8, 162.9, 162.6, 159.6, 156.6, 139.5, 139.4, 135.7, 135.3, 130.3, 130.2, 129.8, 129.4, 127.5, 126.5, 122.9, 117.3, 116.9, 114.4, 61.0, 61.0, 59.3, 58.5, 58.1, 55.3, 55.2, 53.2, 53.0, 47.5, 46.7, 46.1, 21.5, 21.4. **HRMS-EI<sup>+</sup>** ( $m/z$ ): calc'd for  $\text{C}_{23}\text{H}_{23}\text{F}_3\text{N}_2\text{O}_5$  464.1559; found 464.1566.

File :C:\GCMS\Beng Research\Data\AM-2-036B-ESTER.D  
 Operator : Beng  
 Acquired : 25 Oct 2018 21:15 using AcqMethod 150-250\_new.M  
 Instrument : Instrument #1  
 Sample Name:  
 Misc Info :  
 Vial Number: 1

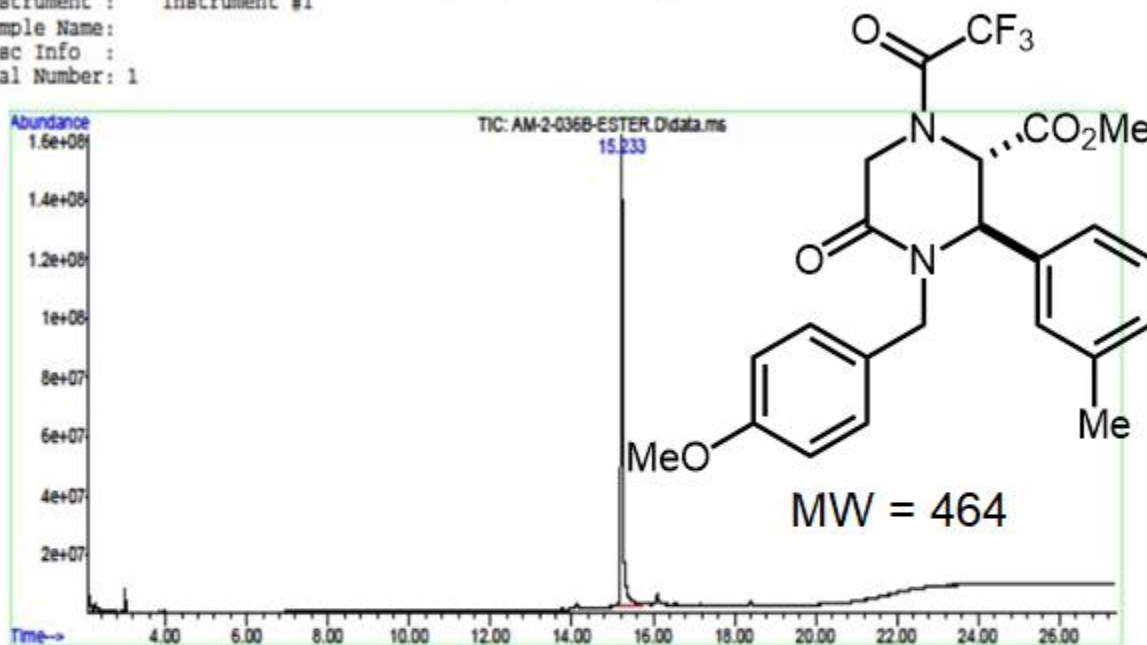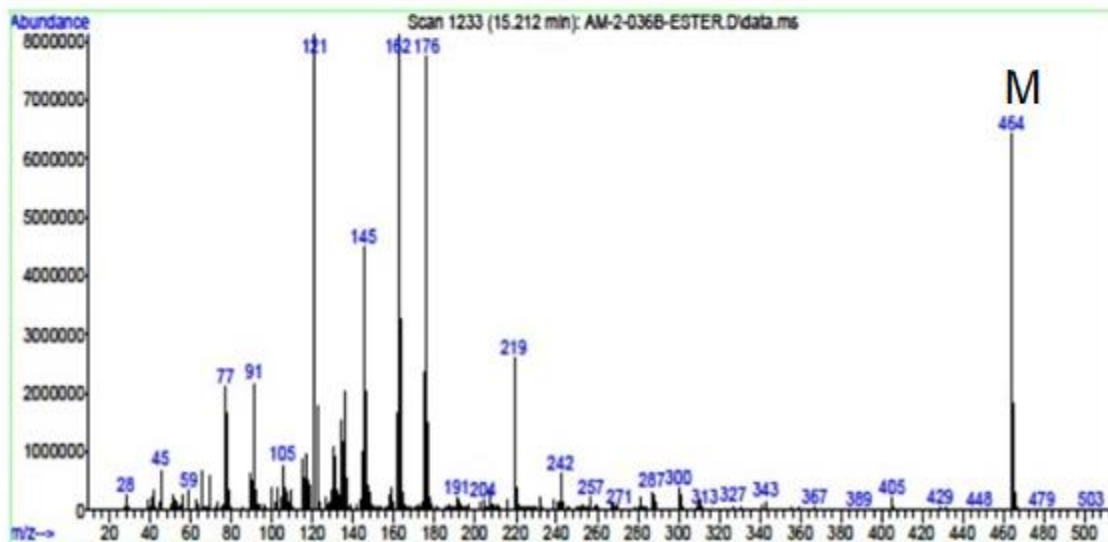



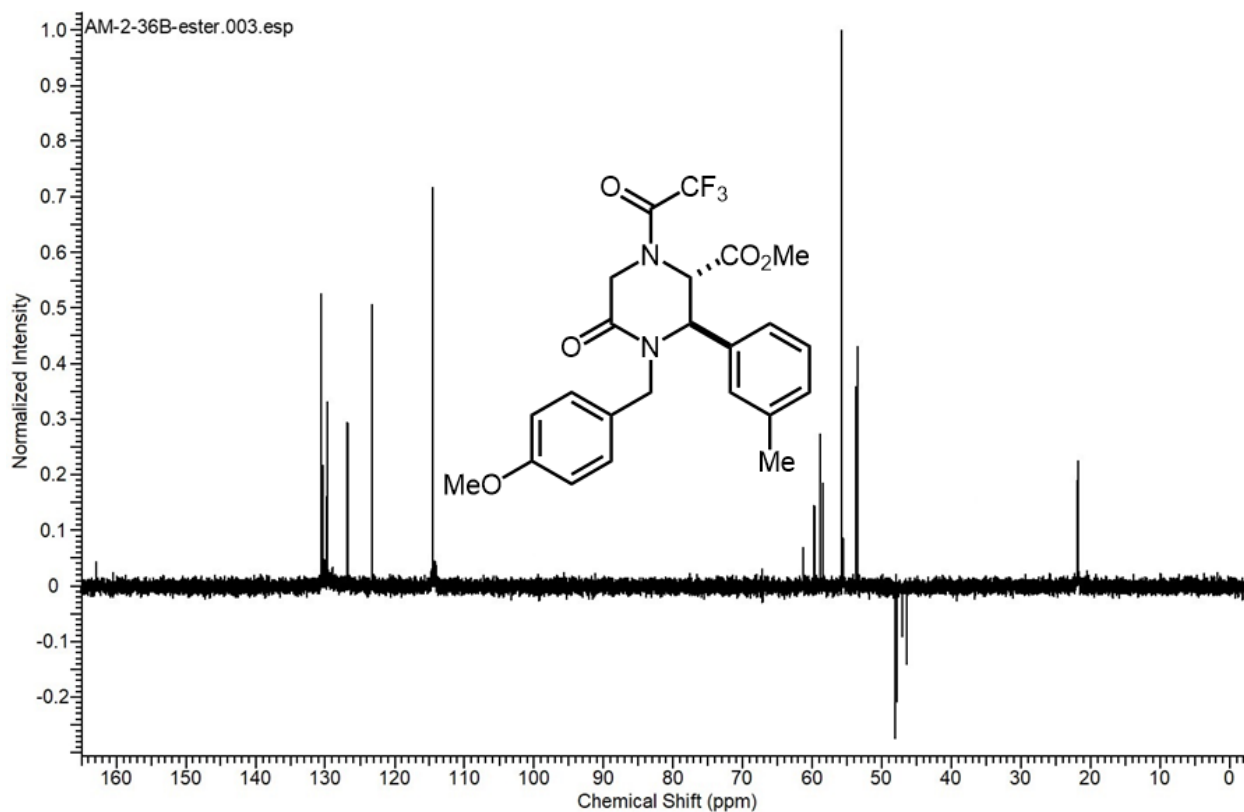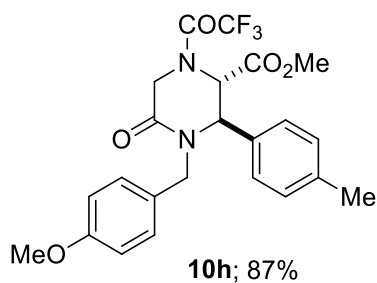

Prepared in 1 mmol scale using General Procedure B. Purification: Flash chromatography on silica eluting with hexane/EtOAc (50:50). Yield = 404 mg, 87%, 95:5 dr.  $^1\text{H}$  NMR (400 MHz, Chloroform-*d*, rotamers)  $\delta$  6.98 – 6.77 (m, 6H), 6.73 – 6.57 (m, 2H), 5.36 (dd,  $J$  = 14.4, 11.9 Hz, 1H), 5.12 – 5.06 (m, 1H), 4.78 (dd,  $J$  = 8.8, 2.1 Hz, 1H), 4.55 – 4.41 (m, 1H), 4.44 – 4.32 (m, 1H), 3.50 (s, 3H), 3.28 (s, 3H), 3.18 (dd,  $J$  = 14.5, 4.0 Hz, 1H), 2.17 (s, 3H).  $^{13}\text{C}$  NMR (101 MHz,  $\text{CDCl}_3$ )  $\delta$  167.2, 167.1, 163.8, 162.9, 162.6, 159.6, 156.6, 155.7, 139.2, 139.1, 132.7, 132.3, 130.2, 130.2, 130.2, 130.1, 127.5, 127.3, 125.8, 125.7, 117.2, 114.2, 61.3, 61.0, 59.1, 58.3, 58.1, 55.3, 53.2, 53.0, 47.6, 46.7, 46.1, 21.8, 21.4. **HRMS-EI<sup>+</sup>** ( $m/z$ ): calc'd for  $\text{C}_{23}\text{H}_{23}\text{F}_3\text{N}_2\text{O}_5$  464.1559; found 464.1566.

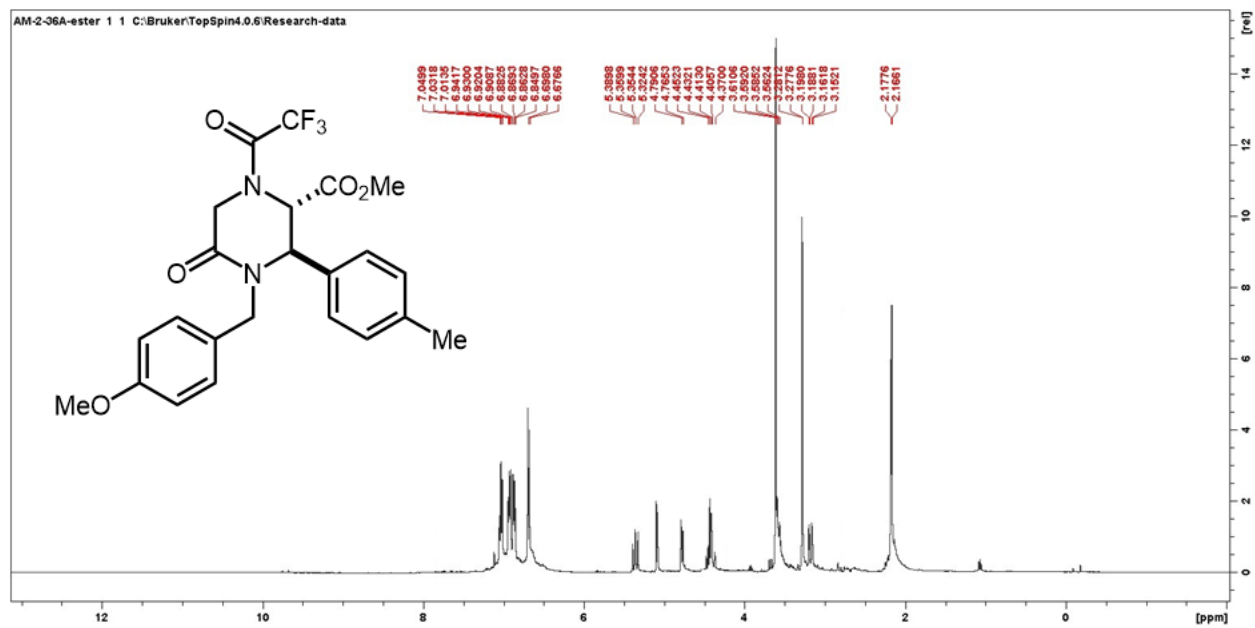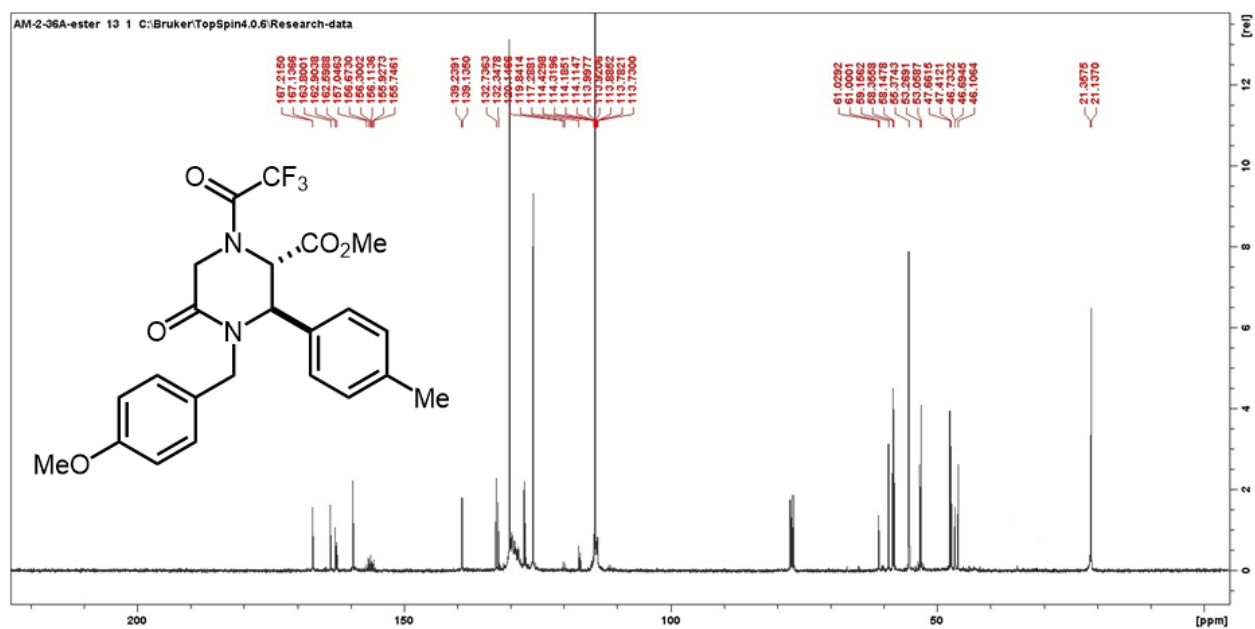

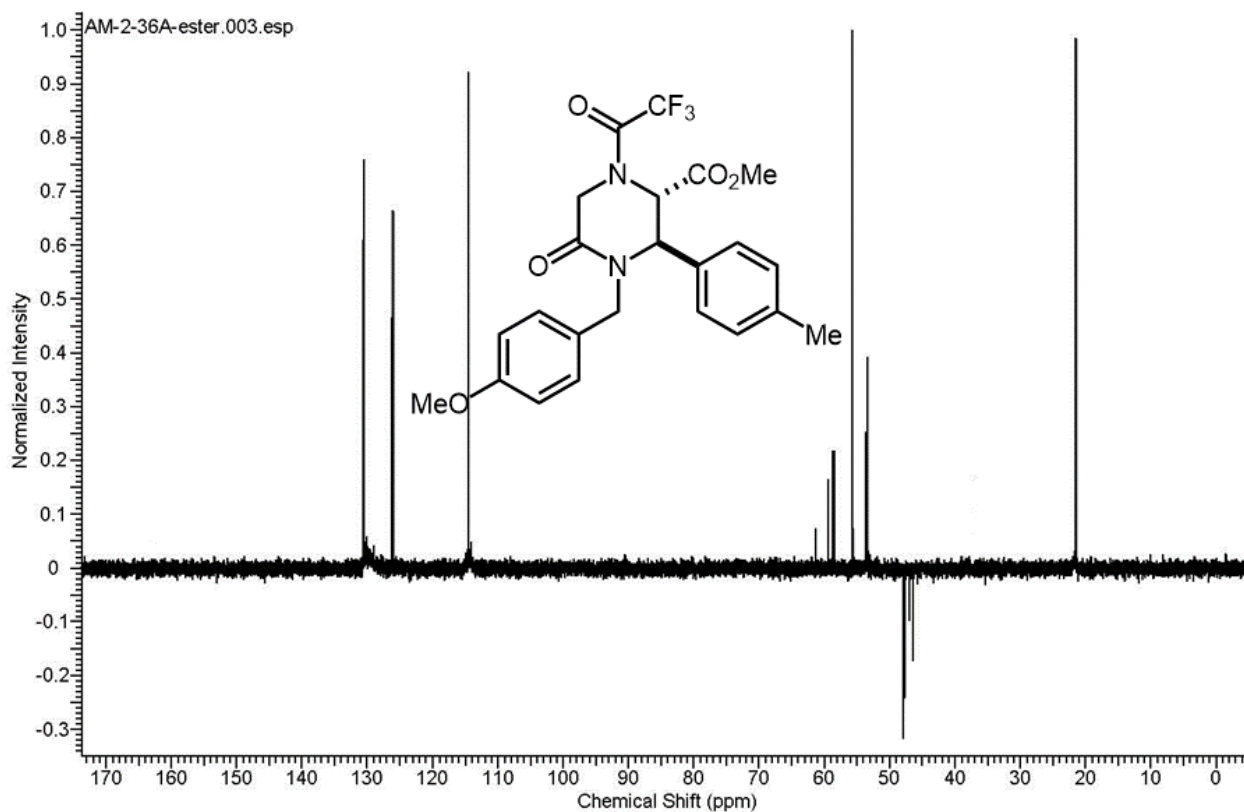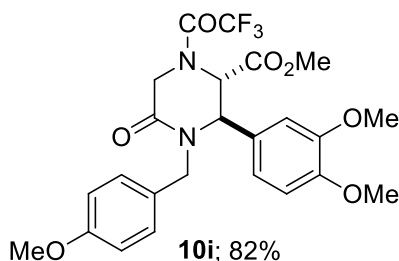

Prepared in 1 mmol scale using General Procedure B. Purification: Flash chromatography on silica eluting with hexane/EtOAc (50:50). Yield = 418 mg, 82%, 95:5 dr.  $^1\text{H}$  NMR (400 MHz, Chloroform-*d*, rotamers)  $\delta$  6.89 (ddq,  $J = 8.1, 5.8, 2.8$  Hz, 2H), 6.66 (dd,  $J = 8.4, 5.2$  Hz, 3H), 6.49 (td,  $J = 8.0, 2.3$  Hz, 1H), 6.40 (dd,  $J = 4.8, 2.2$  Hz, 1H), 5.29 (t,  $J = 14.1$  Hz, 1H), 5.07 (d,  $J = 2.1$  Hz, 1H), 4.72 (dd,  $J = 7.8, 2.1$  Hz, 1H), 4.41 (dd,  $J = 18.3, 3.6$  Hz, 2H), 3.71 – 3.59 (m, 6H), 3.58 (s, 3H), 3.27 (s, 3H), 3.20 (dd,  $J = 14.5, 2.4$  Hz, 1H).  $^{13}\text{C}$  NMR (101 MHz,  $\text{CDCl}_3$ )  $\delta$  167.1, 167.0, 163.6, 162.7, 159.5, 156.5, 156.2., 149.9, 149.6, 130.2, 128.0, 127.6, 127.4, 118.2, 117.2, 116.9, 111.6, 108.8, 61.0, 60.9, 59.1, 58.3, 58.0, 56.0, 55.9, 55.9, 55.3, 53.2, 53.0, 47.7, 47.5, 46.7, 46.6, 45.9. **HRMS-EI<sup>+</sup>** ( $m/z$ ): calc'd for  $\text{C}_{24}\text{H}_{25}\text{F}_3\text{N}_2\text{O}_7$  510.1614; found 510.1614.

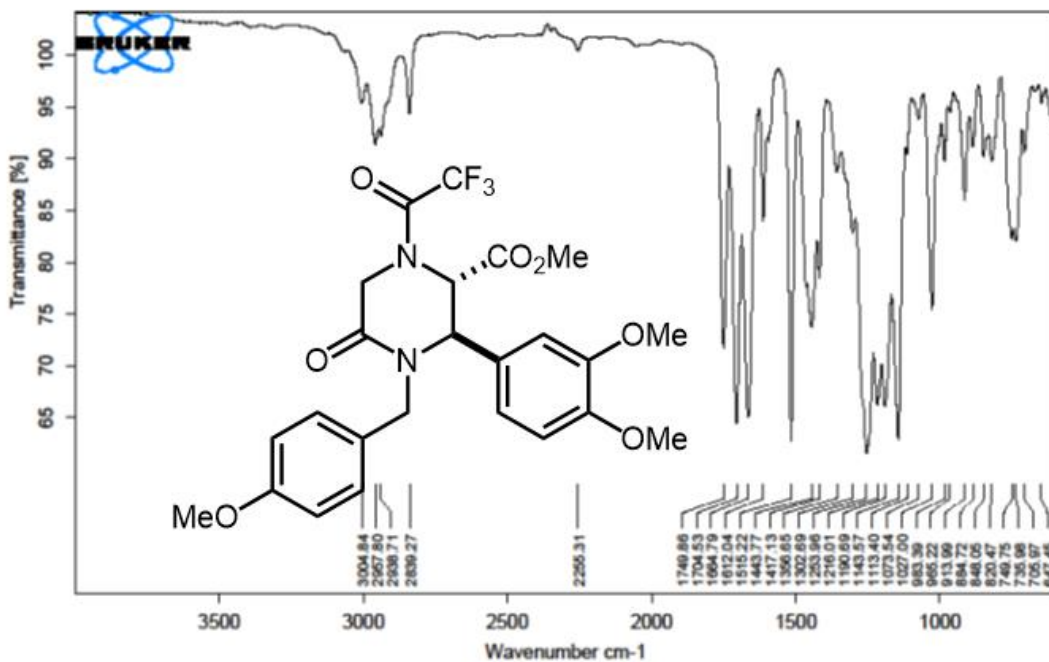

C:\Users\Public\Documents\Bruker\OPUS\_7.5.18\DATA\MEAS\AM-02-043B-F2.0 AM-02-043B-F2 Instrument type and / or accessory 11/10/2018

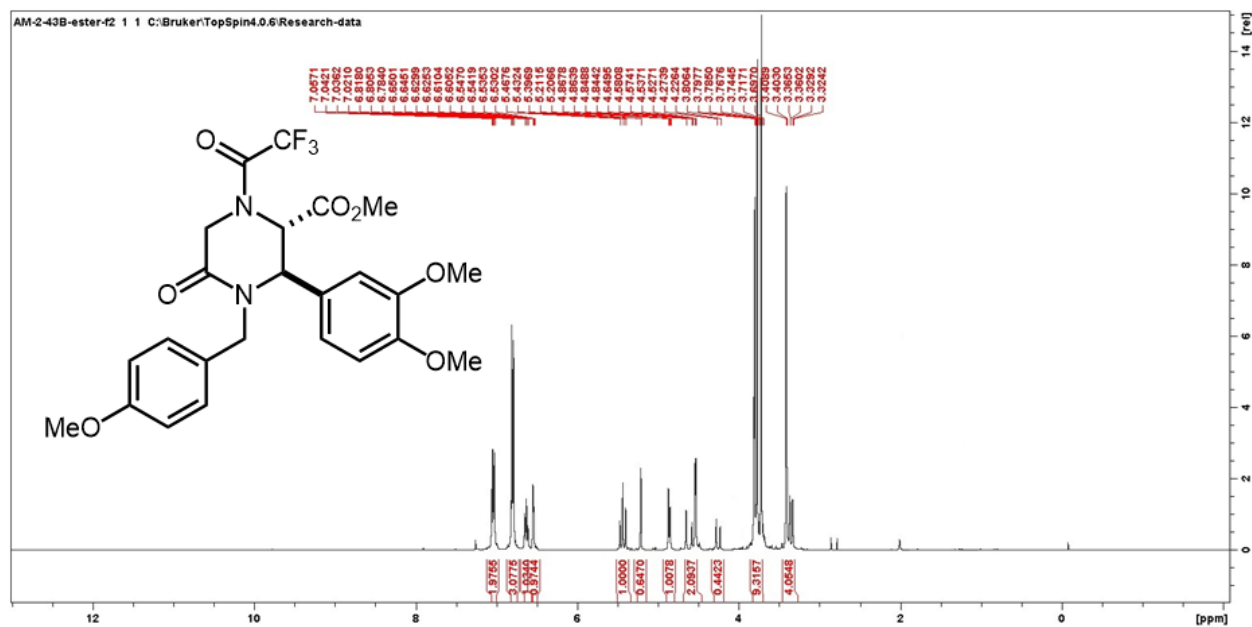

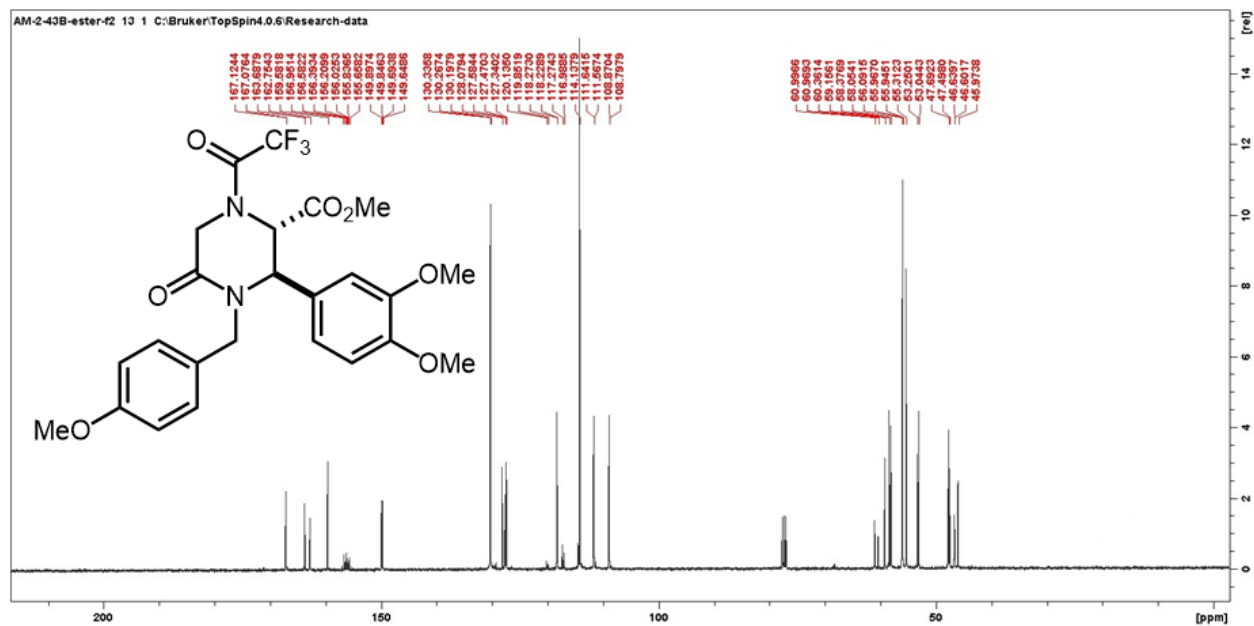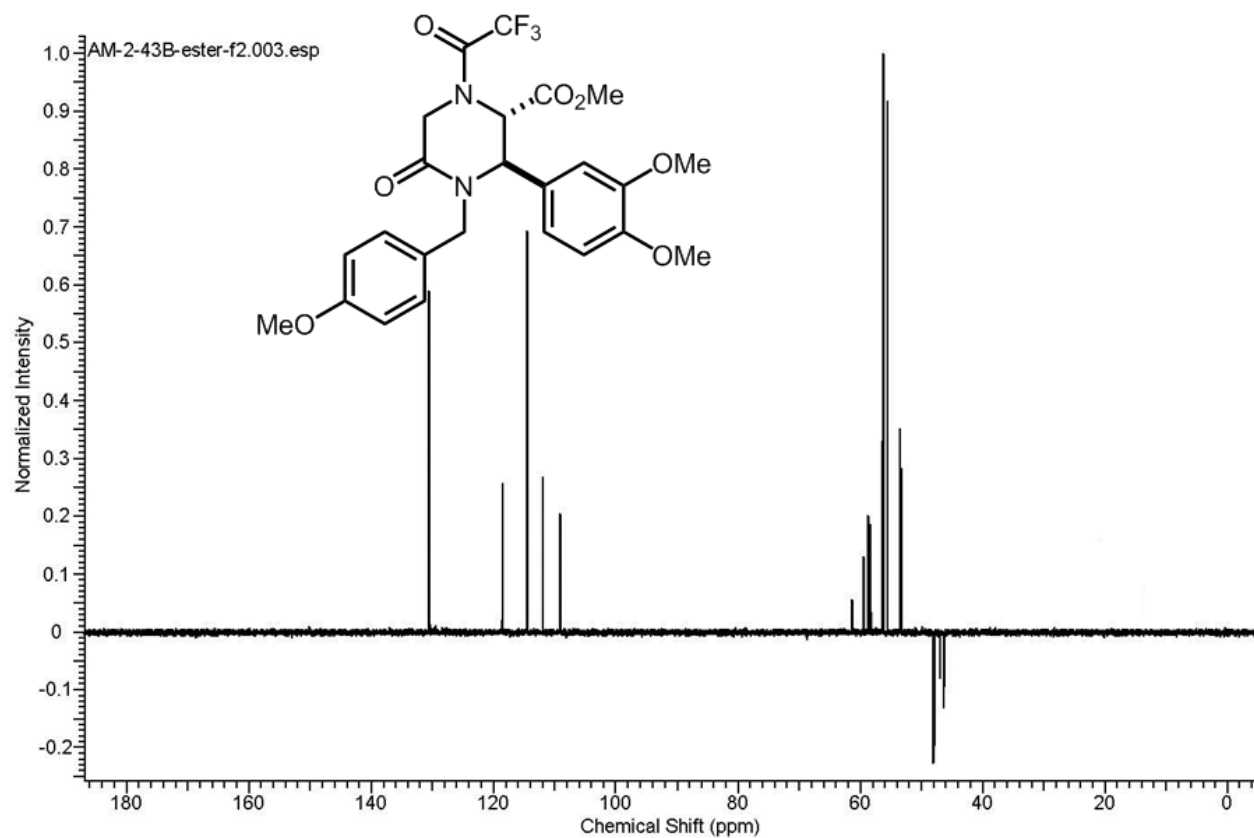



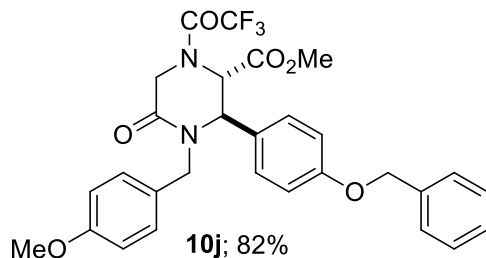

Prepared in 1 mmol scale using General Procedure B. Purification: Flash chromatography on silica eluting with hexane/EtOAc (25:75). Yield = 456 mg, 82%, 95:5 dr.  $^1\text{H}$  NMR (400 MHz, Chloroform-*d*, rotamers)  $\delta$  7.36 – 7.22 (m, 6H), 6.96 – 6.79 (m, 5H), 6.68 (d, 2H), 5.38 (dd,  $J$  = 14.4, 10.2 Hz, 1H), 5.02 – 4.88 (m, 2H), 4.91 – 4.77 (m, 1H), 4.59 – 4.39 (m, 2H), 3.52 (s, 3H), 3.31 (s, 3H), 3.22 (dd,  $J$  = 14.4, 6.1 Hz, 1H).  $^{13}\text{C}$  NMR (101 MHz,  $\text{CDCl}_3$ )  $\delta$  167.2, 167.1, 163.7, 162.8, 159.6, 159.4, 156.7, 156.3, 136.6, 132.1, 130.3, 128.8, 128.7, 128.4, 127.9, 127.6, 127.61, 127.5, 127.4, 127.3, 127.2, 115.92, 115.8, 115.2, 114.28, 114.1, 70.3, 70.2, 58.9, 58.2, 58.1, 55.4, 53.3, 53.1, 47.6, 47.4, 46.1. **HRMS-EI $^+$**  ( $m/z$ ): calc'd for  $\text{C}_{29}\text{H}_{27}\text{F}_3\text{N}_2\text{O}_6$  556.1821; found 556.1827.

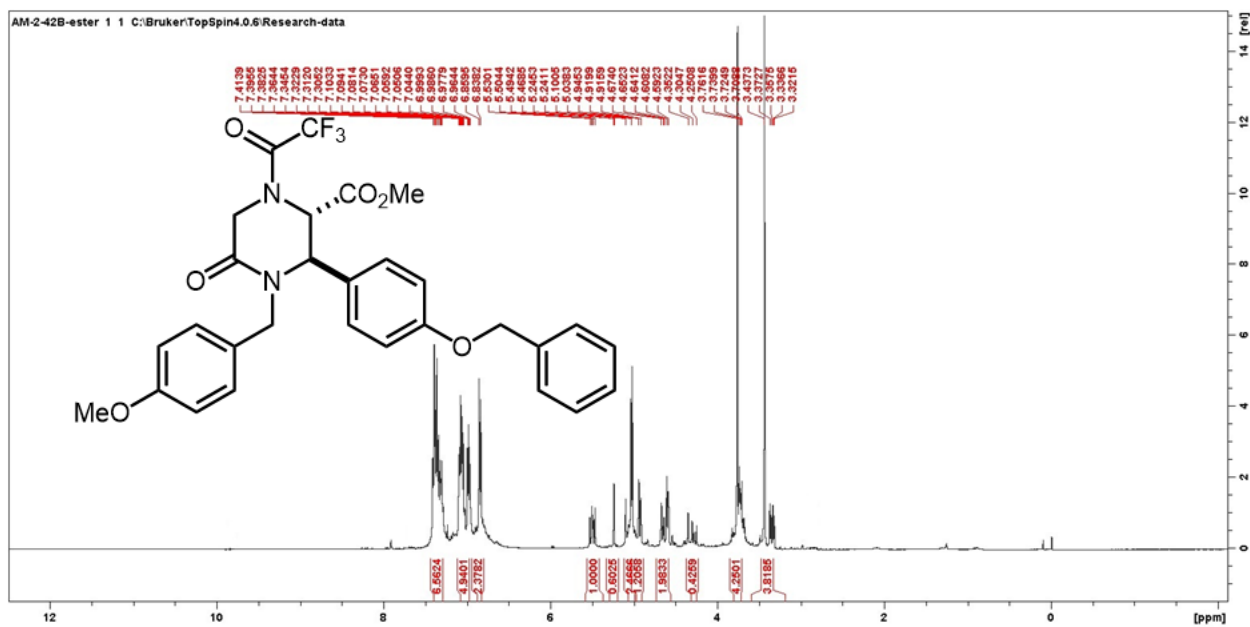

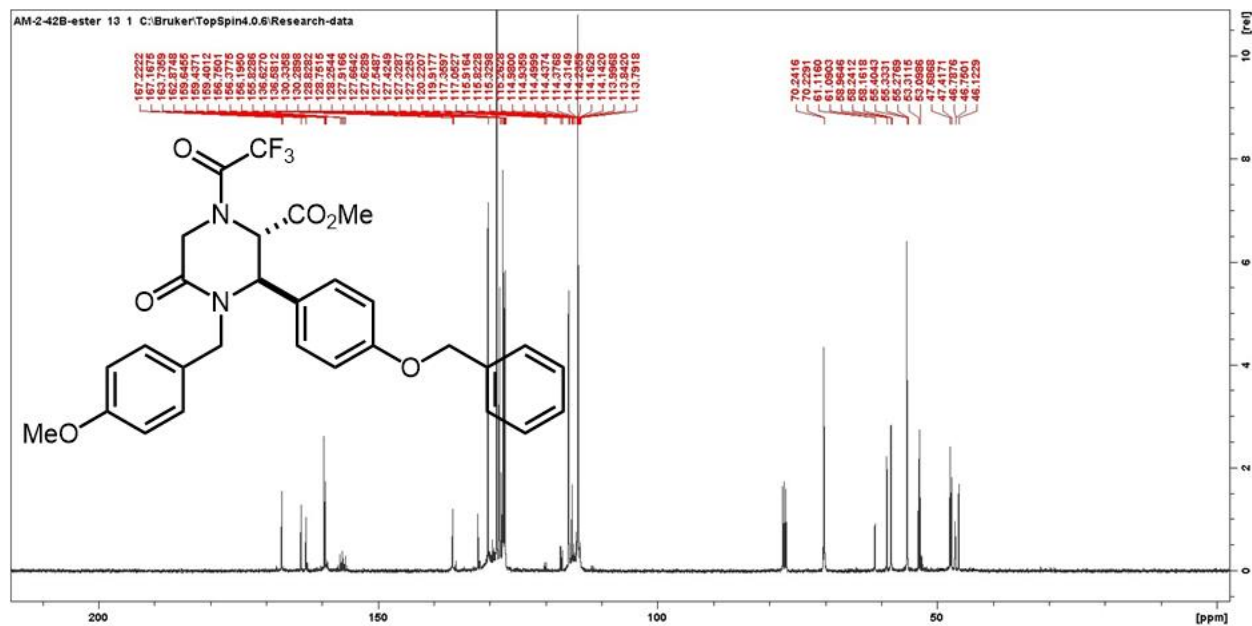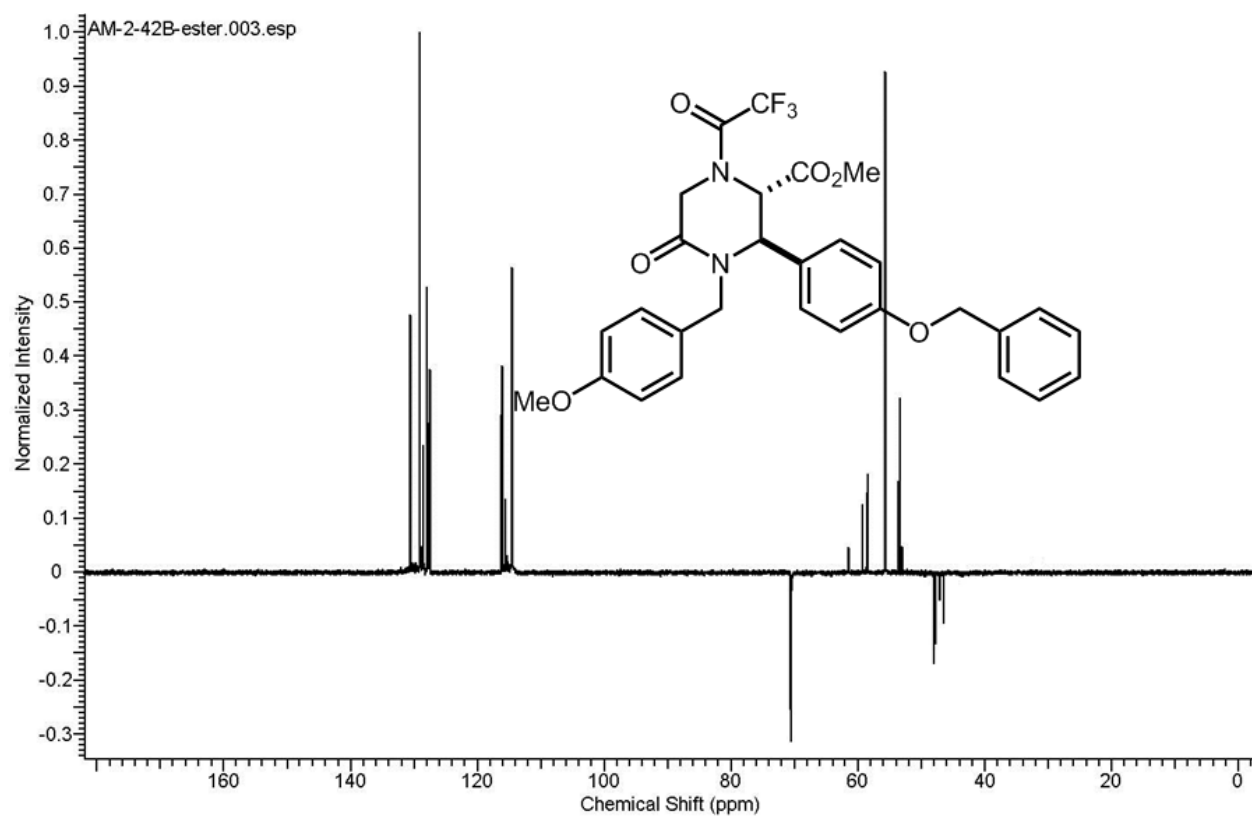

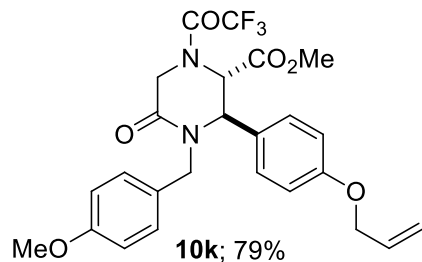

Prepared in 1 mmol scale using General Procedure B. Purification: Flash chromatography on silica eluting with hexane/EtOAc (25:75). Yield = 400 mg, 79%, 95:5 dr.  $^1\text{H}$  NMR (400 MHz, Chloroform-*d*, rotamers)  $\delta$  6.89 – 6.80 (m, 4H), 6.72 – 6.61 (m, 4H), 5.86 (ddt,  $J = 17.3, 10.5, 5.2$  Hz, 1H), 5.33 – 5.04 (m, 4H), 4.77 (dd,  $J = 9.8, 2.1$  Hz, 1H), 4.53 – 4.42 (m, 4H), 3.61 (s, 3H), 3.28 (s, 3H), 3.20 (dd,  $J = 14.4, 5.8$  Hz, 1H).  $^{13}\text{C}$  NMR (101 MHz,  $\text{CDCl}_3$ )  $\delta$  167.2, 167.1, 163.7, 162.8, 159.6, 159.2, 156.6, 156.3, 156.15, 132.9, 130.3, 127.7, 127.52, 127.3, 127.1, 118.0, 117.9, 115.7, 115.0, 114.8, 114.2, 114.1, 68.9, 61.0, 61.0, 58.9, 58.19, 58.12, 55.36, 55.30, 53.27, 53.05, 47.65, 47.38, 46.74, 46.6. **HRMS-EI<sup>+</sup>** ( $m/z$ ): calc'd for  $\text{C}_{25}\text{H}_{25}\text{F}_3\text{N}_2\text{O}_6$  506.1665; found 506.1672.

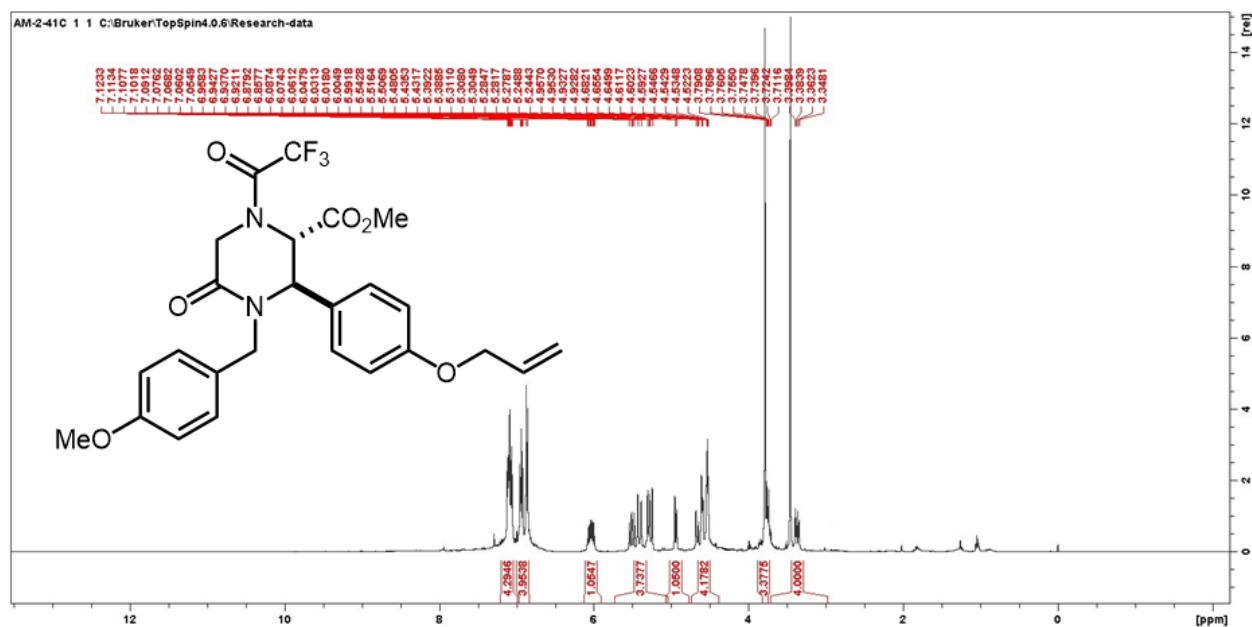

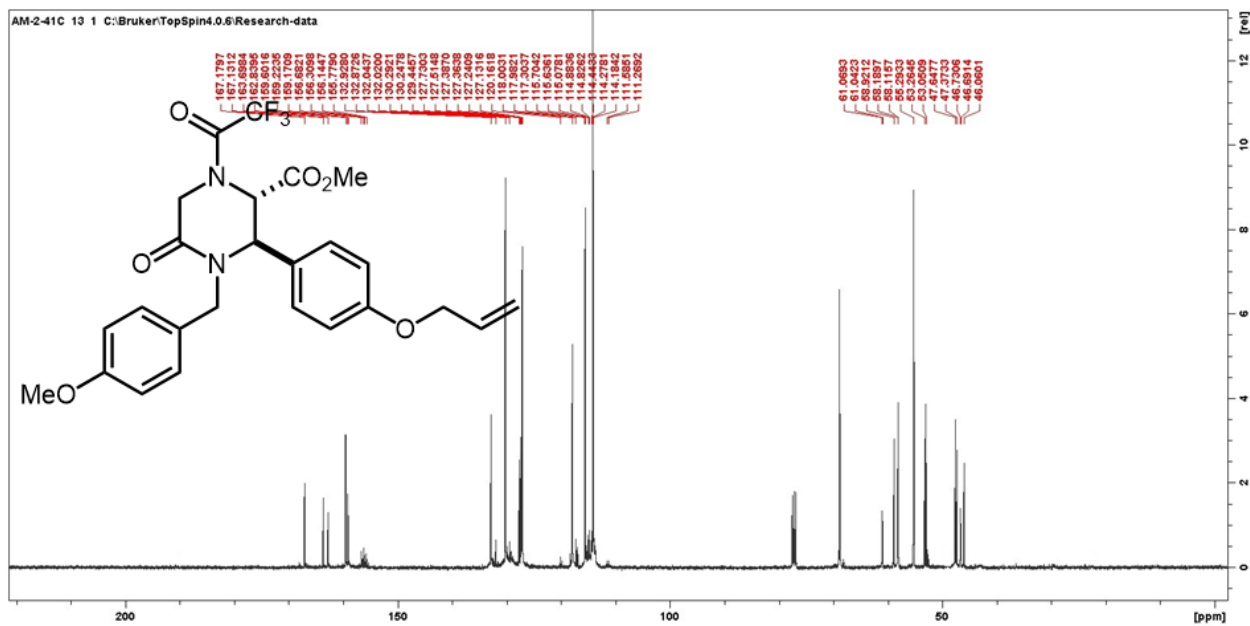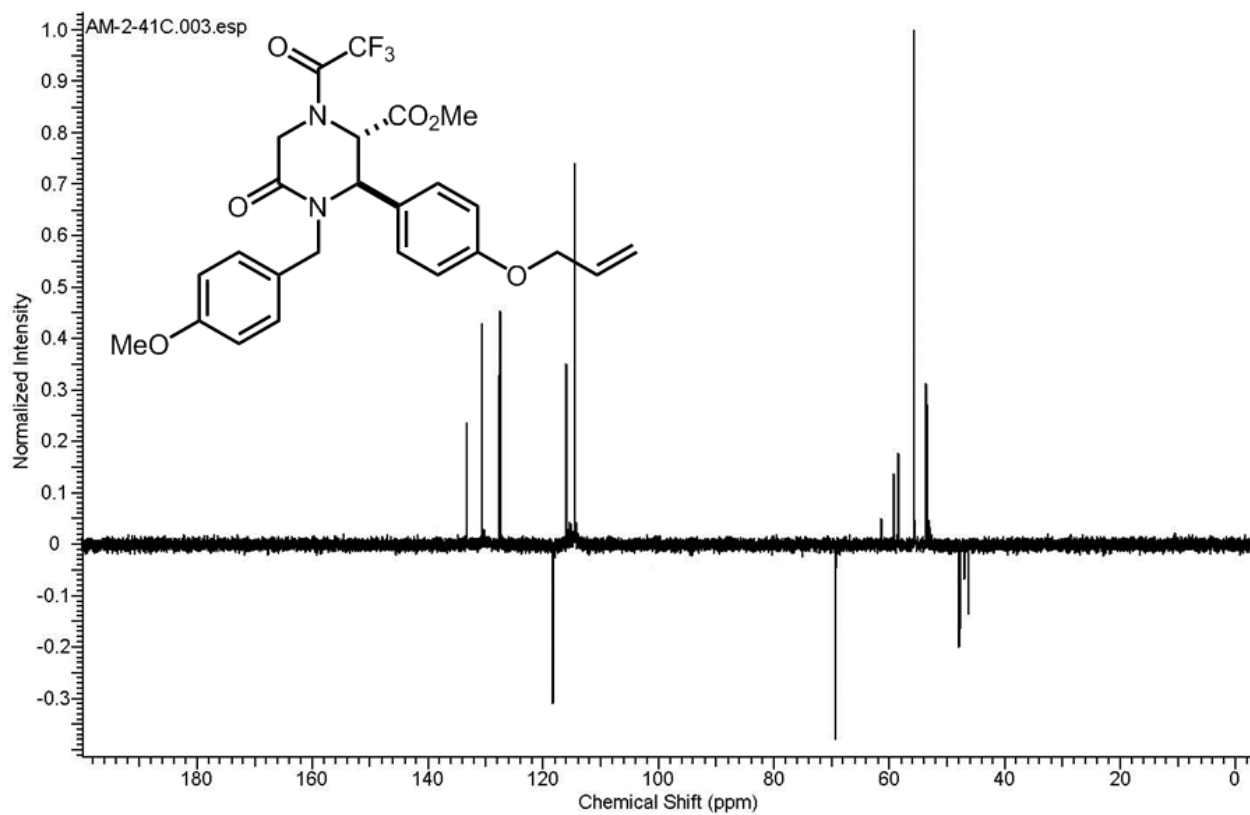

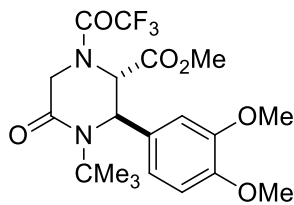

Prepared in 1 mmol scale using General Procedure B. Purification: Flash chromatography on silica eluting with hexane/EtOAc (50:50). Yield = 335 mg, 75%, 95:5 dr.  $^1\text{H}$  NMR (400 MHz, Chloroform-*d*, rotamers)  $\delta$  6.66 (dd,  $J = 8.3, 3.1$  Hz, 1H), 6.55 (ddd,  $J = 8.1, 5.6, 2.2$  Hz, 1H), 6.47 (t,  $J = 2.6$  Hz, 1H), 5.31 (dd,  $J = 8.3, 2.8$  Hz, 1H), 4.19 (s, 1H), 4.17 – 4.06 (m, 2H), 3.69 – 3.63 (m, 9H), 1.21 (s, 9H).  $^{13}\text{C}$  NMR (101 MHz,  $\text{CDCl}_3$ )  $\delta$  168.0, 167.7, 164.2, 163.3, 156.3, 155.9, 155.5, 155.2, 149.6, 149.2, 149.1, 130.1, 129.6, 118.1, 111.5, 111.4, 108.6, 108.4, 62.7, 62.6, 60.0, 59.6, 58.7, 57.7, 56.0, 55.9, 53.7, 53.4, 52.8, 52.6, 48.8, 47.7, 28.0, 27.9. **HRMS-EI<sup>+</sup>** ( $m/z$ ): calc'd for  $\text{C}_{20}\text{H}_{25}\text{F}_3\text{N}_2\text{O}_6$  446.1665; found 446.1669.

```
File       : C:\GCMS\Beng Research\Data\TKB-11-025A-F2.D
Operator   : Beng
Acquired   : 31 Oct 2018 17:43   using AcqMethod 150-250_NEW.M
Instrument  : Instrument #1
Sample Name:
Misc Info  :
Vial Number: 1
```

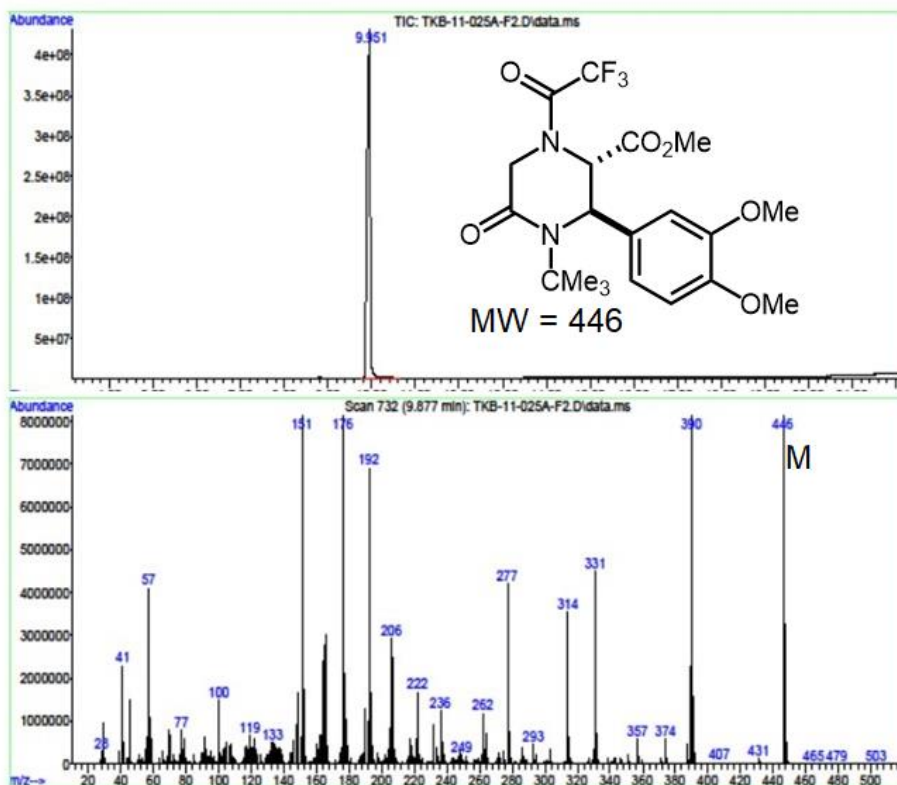

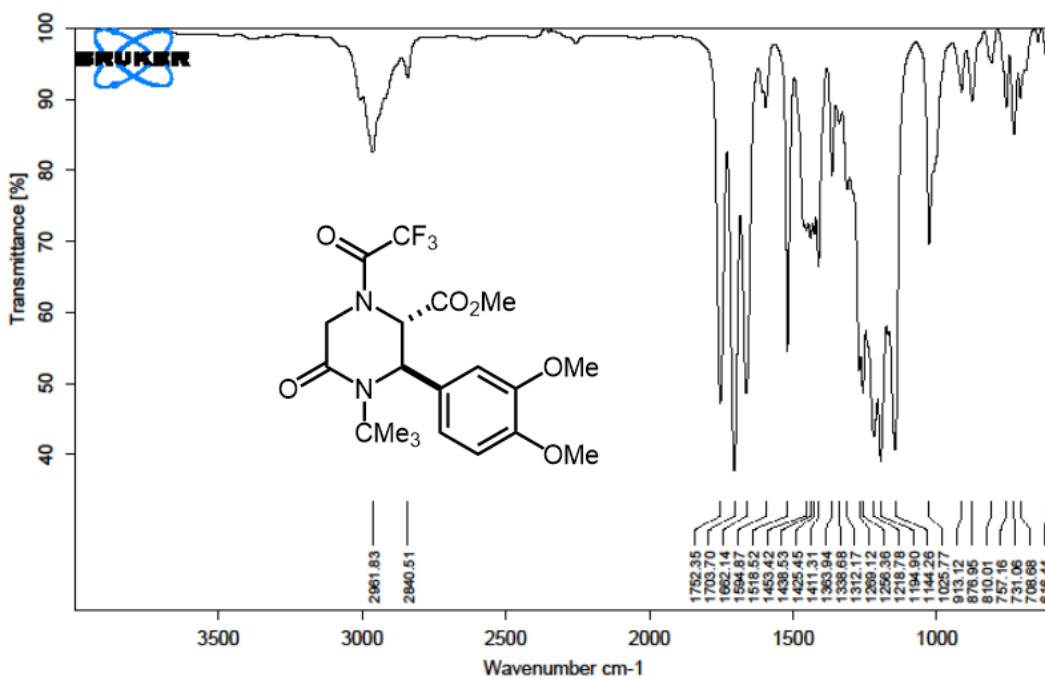

|                                                                         |                |                                    |            |
|-------------------------------------------------------------------------|----------------|------------------------------------|------------|
| C:\Users\Public\Documents\Bruker\OPUS_7.5.18\DATA\MEAS\TKB-11-025A-f2.0 | TKB-11-025A-f2 | Instrument type and / or accessory | 10/14/2018 |
|-------------------------------------------------------------------------|----------------|------------------------------------|------------|

Page 1/1

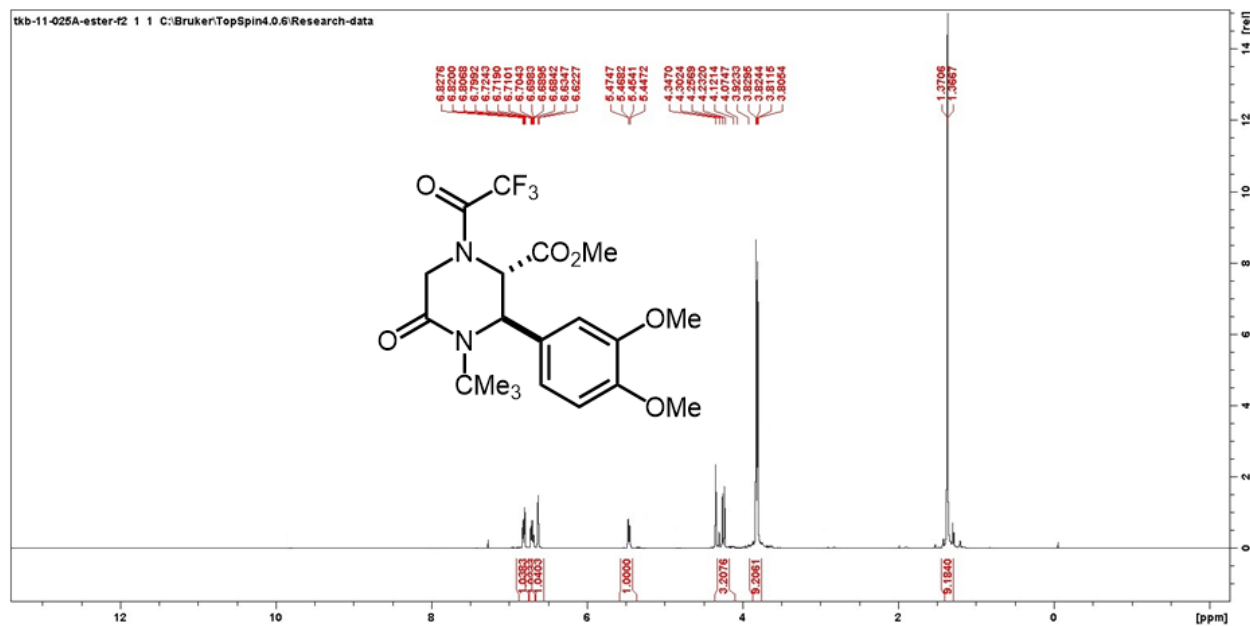

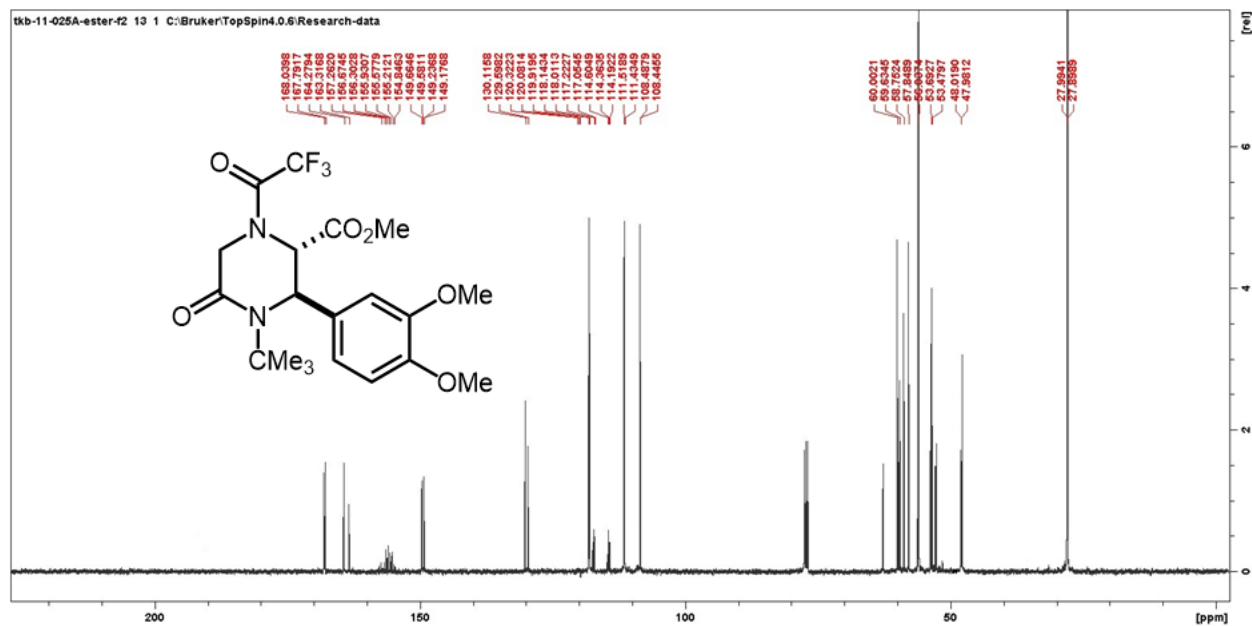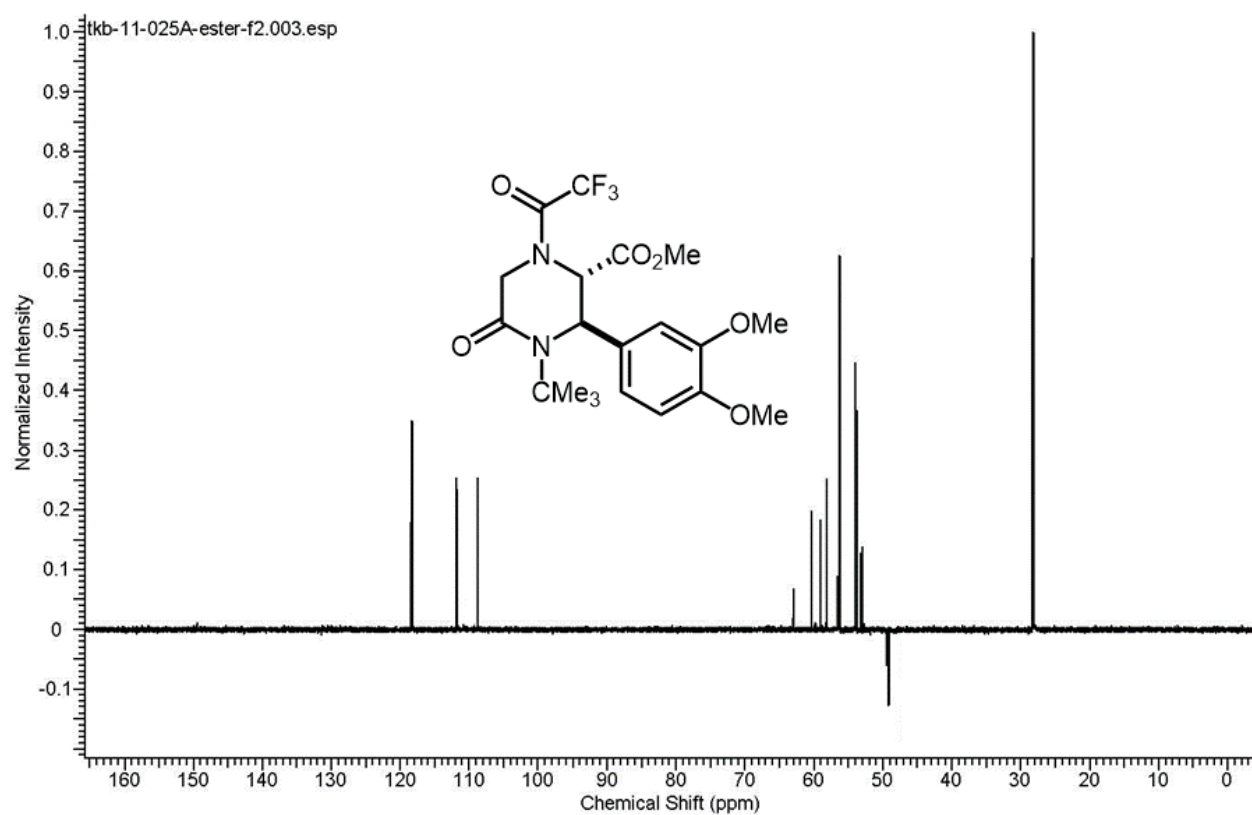

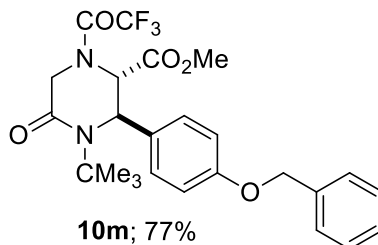

Prepared in 5 mmol scale using General Procedure B. Purification: Flash chromatography on silica eluting with hexane/EtOAc (50:50). Yield = 1.895 g, 77%, 95:5 dr.  $^1\text{H}$  NMR (400 MHz, Chloroform-*d*, rotamers)  $\delta$  7.30 – 7.21 (m, 5H), 7.02 – 6.92 (m, 2H), 6.87 – 6.78 (m, 2H), 5.36 (d,  $J$  = 9.6 Hz, 1H), 4.88 (d,  $J$  = 4.0 Hz, 2H), 4.26 – 4.10 (m, 3H), 3.70 (s, 3H), 1.25 (s, 9H).  $^{13}\text{C}$  NMR (101 MHz,  $\text{CDCl}_3$ )  $\delta$  168.0, 167.8, 164.2, 163.3, 159.0, 158.9, 156.4, 156.0, 136.6, 136.5, 129.9, 128.7, 127.6, 126.9, 117.1, 115.5, 114.6, 114.42, 70.3, 70.2, 62.7, 60.1, 59.6, 59.4, 58.6, 57.6, 53.7, 52.8, 48.9, 47.8, 28.0, 27.9. **HRMS-EI<sup>+</sup>** ( $m/z$ ): calc'd for  $\text{C}_{25}\text{H}_{27}\text{F}_3\text{N}_2\text{O}_5$  492.1872; found 492.1877.

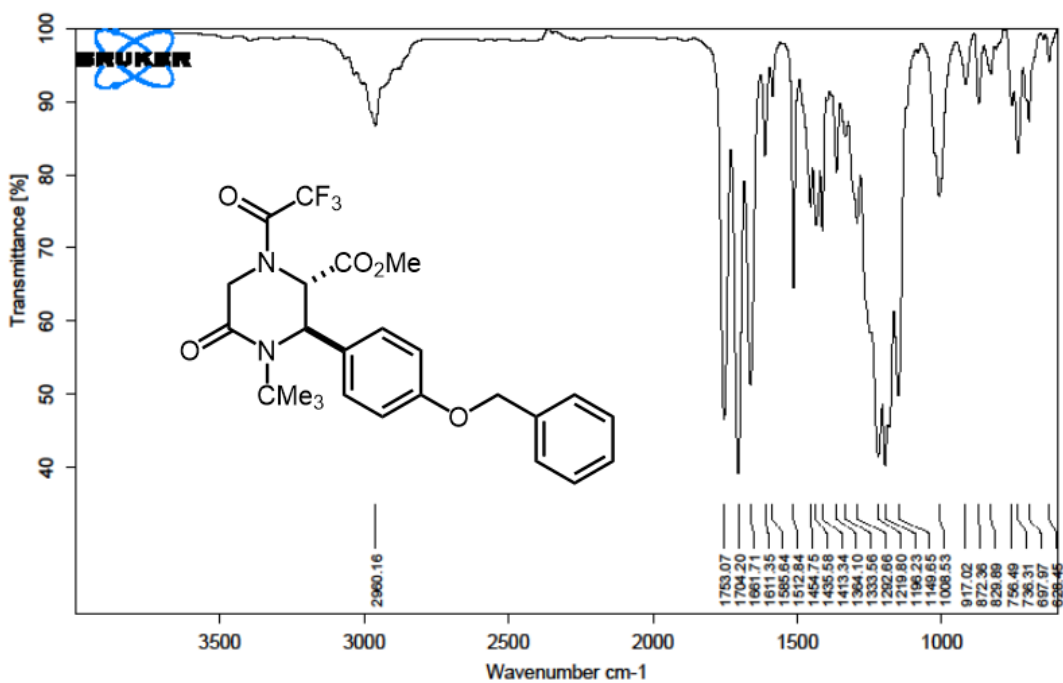

|                                                                         |                |                                    |            |
|-------------------------------------------------------------------------|----------------|------------------------------------|------------|
| C:\Users\Public\Documents\Bruker\OPUS_7.5.18\DATA\MEAS\TKB-11-025B-f2.0 | TKB-11-025B-f2 | Instrument type and / or accessory | 10/14/2018 |
|-------------------------------------------------------------------------|----------------|------------------------------------|------------|



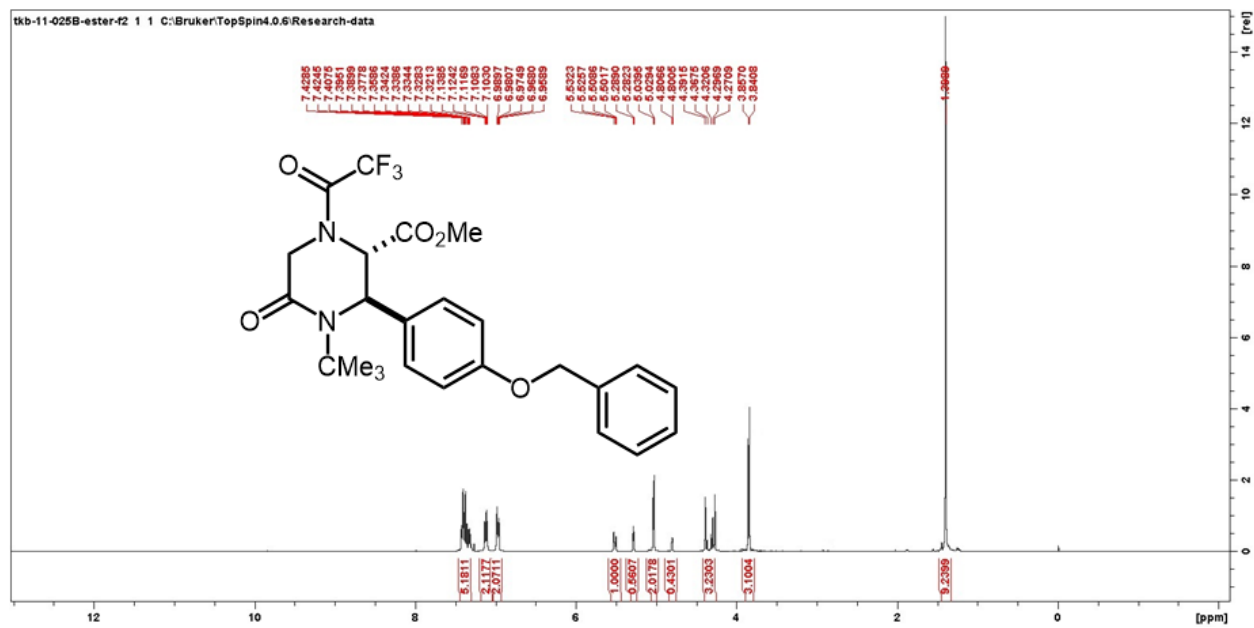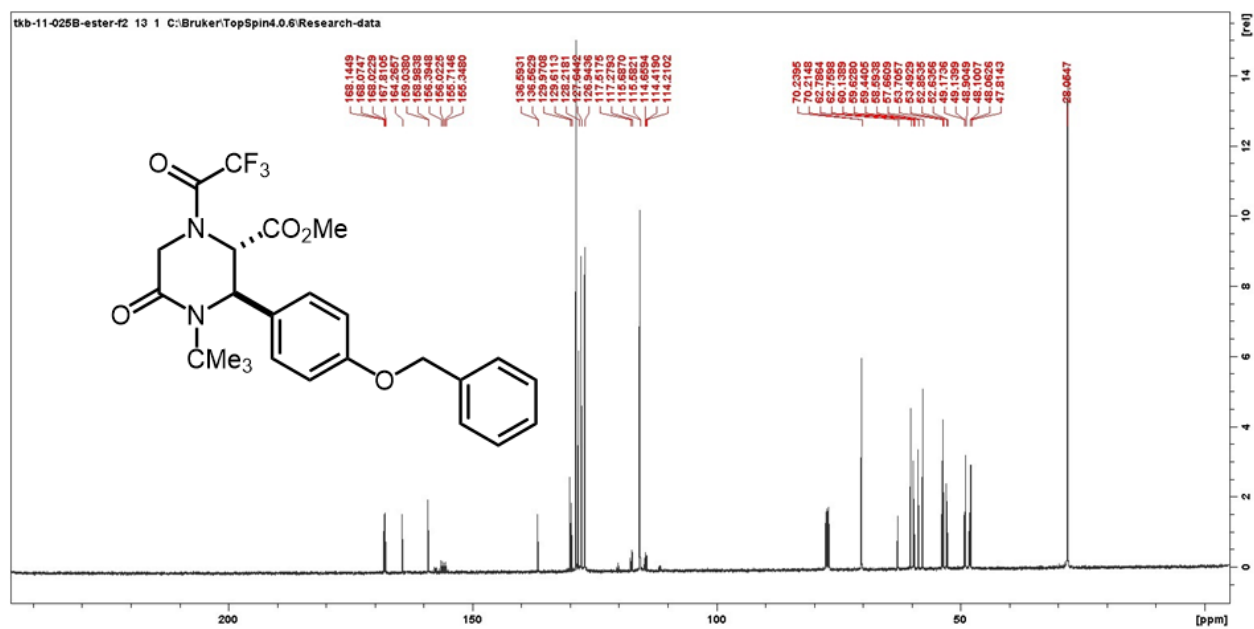

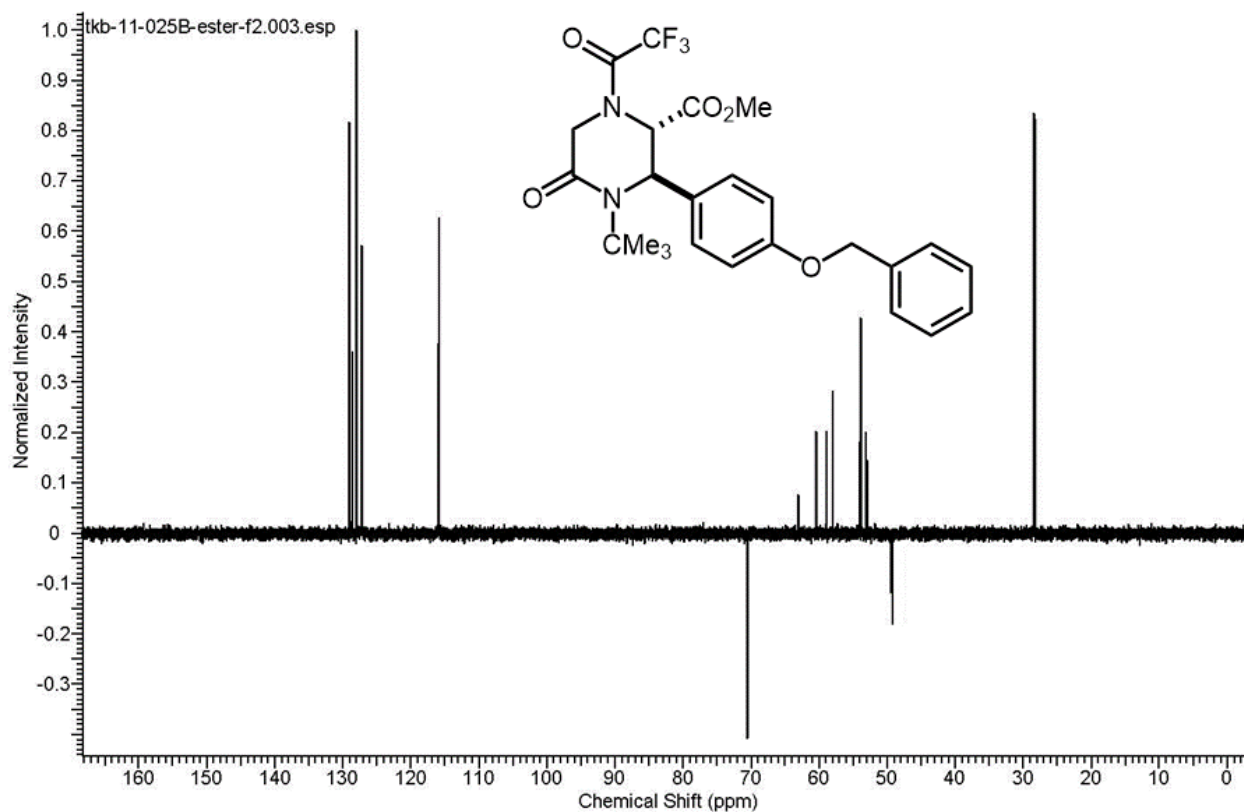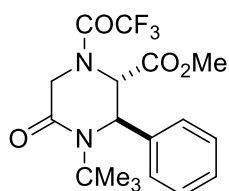**10n**; 72%

Prepared in 1 mmol scale using General Procedure B. Purification: Flash chromatography on silica eluting with hexane/EtOAc (75:25). Yield = 278 mg, 72%, 95:5 dr.  $^1\text{H}$  NMR (400 MHz, Chloroform-*d*, mixture of rotamers)  $\delta$  7.36 – 7.23 (m, 5H), 5.53 (dd,  $J = 8.8, 2.8$  Hz, 1H), 5.30 (d,  $J = 2.8$  Hz, 0.5H), 4.82 (d,  $J = 2.8$  Hz, 0.5H), 4.32 – 4.01 (m, 2H), 3.81 (s, 3H), 1.36 (s, 9H).  $^{13}\text{C}$  NMR (101 MHz,  $\text{CDCl}_3$ )  $\delta$  167.9, 167.6, 164.2, 163.1, 156.26, 155.8, 155.6, 155.2, 137.8, 137.5, 129.3, 129.3, 128.7, 128.6, 125.6, 125.5, , 118.7, 117.1, 116.3, 62.6, 62.6, 60.00, 59.6, 59.0, 58.0, 53.7, 53.4, 48.0, 47.7, 28.0, 27.9. **HRMS-EI<sup>+</sup>** ( $m/z$ ): calc'd for  $\text{C}_{18}\text{H}_{21}\text{F}_3\text{N}_2\text{O}_4$  386.1453; found 386.1459.

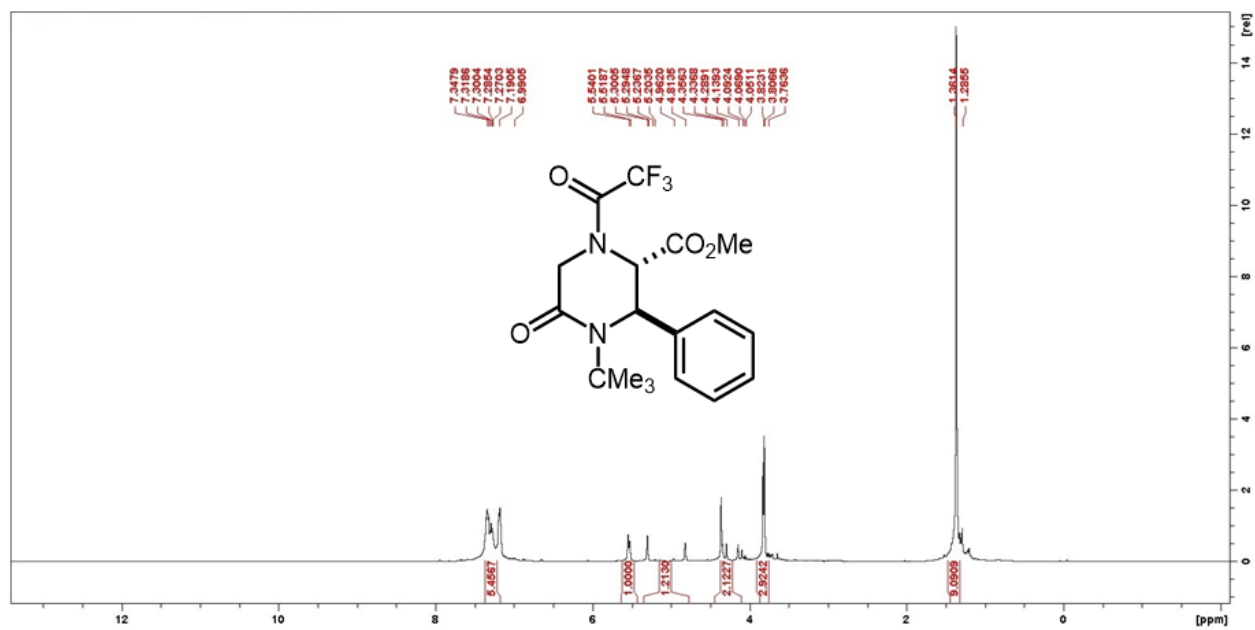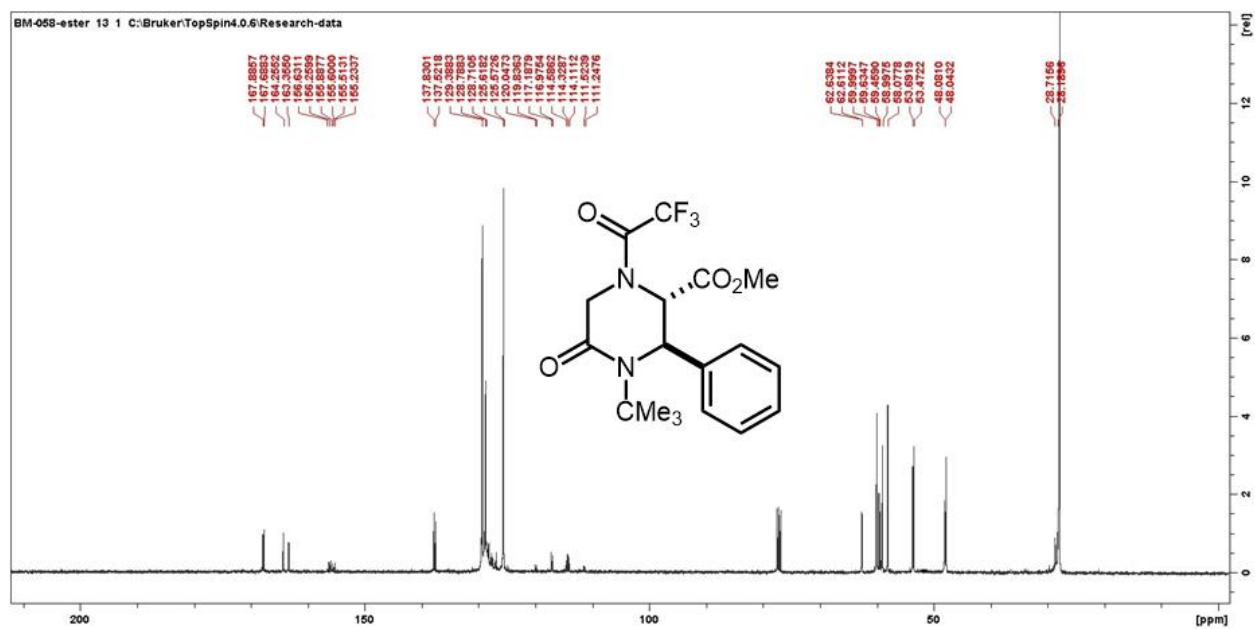

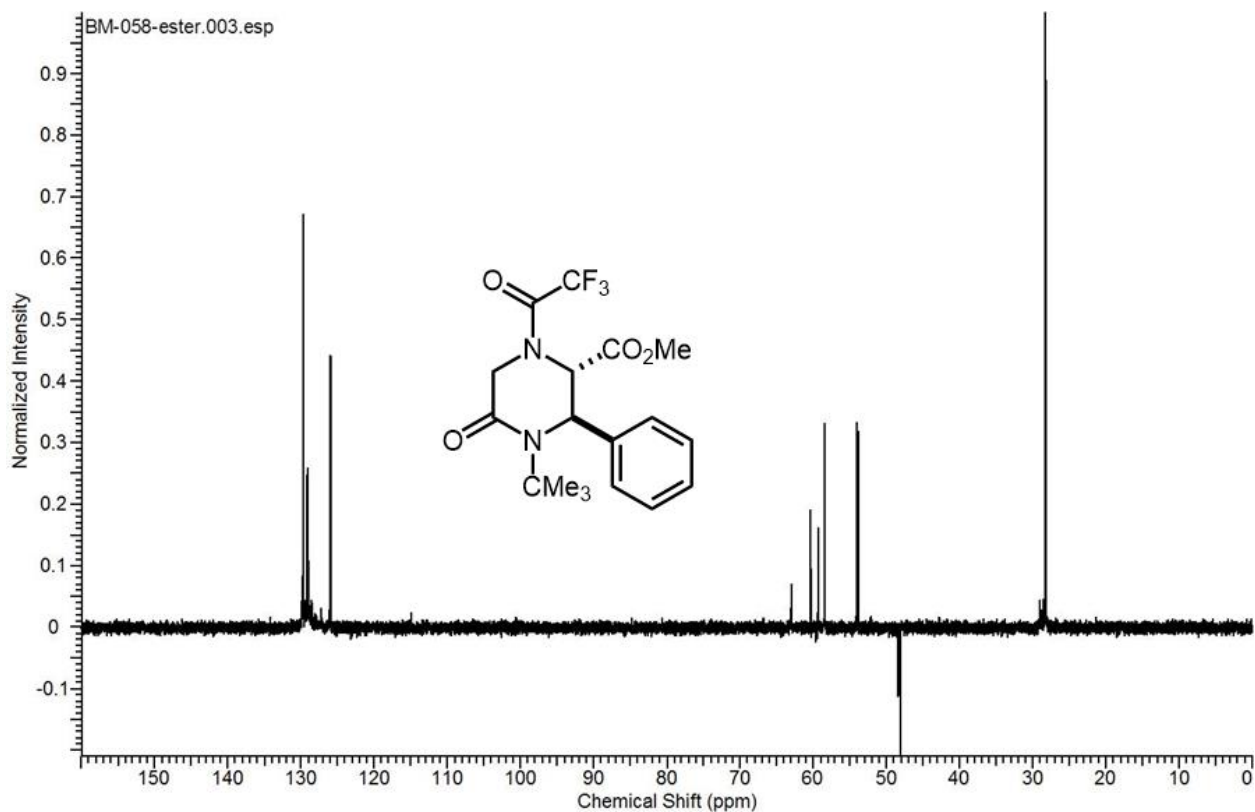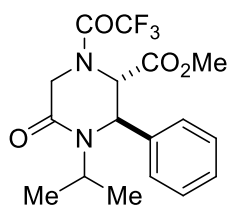**10a**; 70%

Prepared in 1 mmol scale using General Procedure B. Purification: Flash chromatography on silica eluting with hexane/EtOAc (75:25). Yield = 260 mg, 70%, 95:5 dr.  $^1\text{H}$  NMR (400 MHz, Chloroform-*d*, mixture of rotamers)  $\delta$  7.31 – 7.09 (m, 5H), 5.20 (dd,  $J = 13.8, 2.4$  Hz, 1H), 4.78 (td,  $J = 14.3, 12.4, 6.9$  Hz, 1H), 4.46 (d,  $J = 11.2$  Hz, 2H), 4.23 (t,  $J = 18.5$  Hz, 1H), 3.63 (s, 3H), 1.07 (d,  $J = 6.9$  Hz, 3H), 0.85 (d,  $J = 6.9$  Hz, 3H).  $^{13}\text{C}$  NMR (101 MHz,  $\text{CDCl}_3$ )  $\delta$  167.6, 167.4, 163.5, 162.6, 155.9, 137.9, 137.7, 129.3, 129.2, 128.9, 128.8, 128.6, 128.3, 125.8, 125.6, 125.6, 119.7, 117.2, 116.9, 114.3, 114.1, 62.1, 62.0, 59.3, 56.9, 56.1, 53.7, 53.5, 47.1, 47.1, 47.0, 46.7, 46.6, 46.1, 19.8, 19.7, 19.6. **HRMS-EI<sup>+</sup>** ( $m/z$ ): calc'd for  $\text{C}_{17}\text{H}_{19}\text{F}_3\text{N}_2\text{O}_4$  372.1297; found 372.1291.

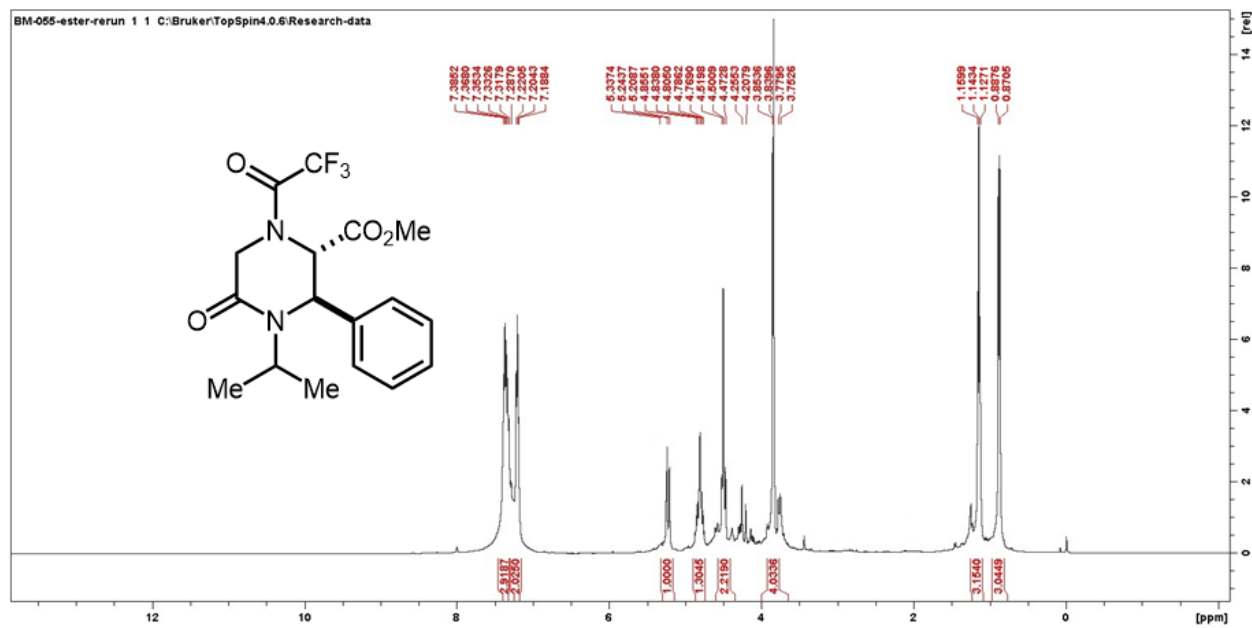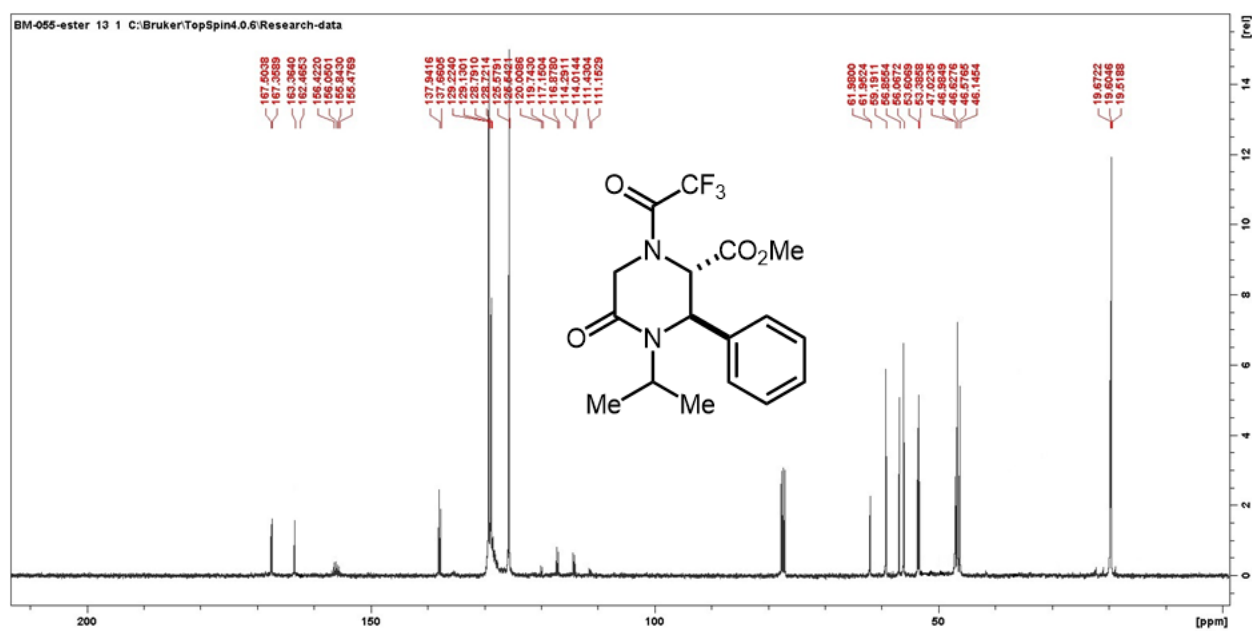

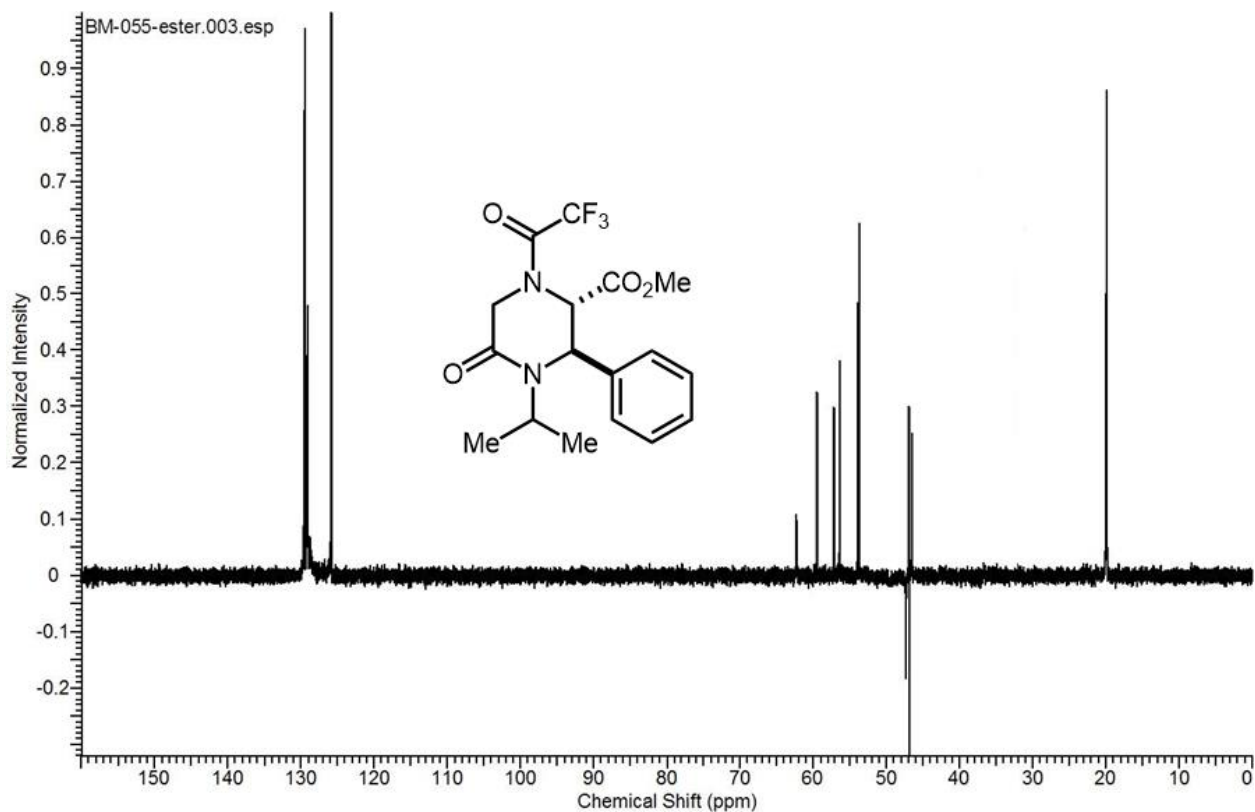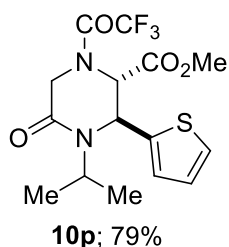

Prepared in 1 mmol scale using General Procedure B. Purification: Flash chromatography on silica eluting with hexane/EtOAc (50:50). Yield = 299 mg, 79%, 95:5 dr.  $^1\text{H}$  NMR (400 MHz, Chloroform-*d*, mixture of rotamers)  $\delta$  7.11 (td,  $J = 4.6, 1.8$  Hz, 1H), 6.80 (qd,  $J = 4.9, 4.2, 2.8$  Hz, 2H), 5.29 (dd,  $J = 17.0, 2.5$  Hz, 1H), 4.54 (dp,  $J = 28.8, 6.9$  Hz, 1H), 4.41 – 4.25 (m, 2H), 4.15 – 4.05 (m, 1H), 3.66 (d,  $J = 5.7$  Hz, 3H), 3.59 (d,  $J = 10.5$  Hz, 2H), 0.97 (dd,  $J = 9.0, 6.8$  Hz, 3H), 0.82 (dd,  $J = 7.0, 3.3$  Hz, 3H).  $^{13}\text{C}$  NMR (101 MHz,  $\text{CDCl}_3$ )  $\delta$  168.1, 167.2, 162.9, 162.0, 161.1, 157.2, 156.9, 156.5, 156.1, 155.7, 141.9, 141.5, 127.4, 127.2, 126.2, 126.2, 125.8, 120.1, 119.4, 117.4, 117.2, 114.63, 114.21, 111.55, 62.2, 59.3, 53.7, 53.2, 52.8, 52.6, 52.6, 46.9, 46.7, 46.6, 19.7, 19.6, 19.5, 19.4. **HRMS-EI<sup>+</sup>** ( $m/z$ ): calc'd for  $\text{C}_{15}\text{H}_{17}\text{F}_3\text{N}_2\text{O}_4\text{S}$  378.0861; found 378.0869.

File :C:\GCMS\Beng Research\Data\TKB-11-027B-F2.D  
 Operator : Beng  
 Acquired : 29 Oct 2018 20:04 using AcqMethod 150-250\_NEW.M  
 Instrument : Instrument #1  
 Sample Name :  
 Misc Info :  
 Vial Number: 1

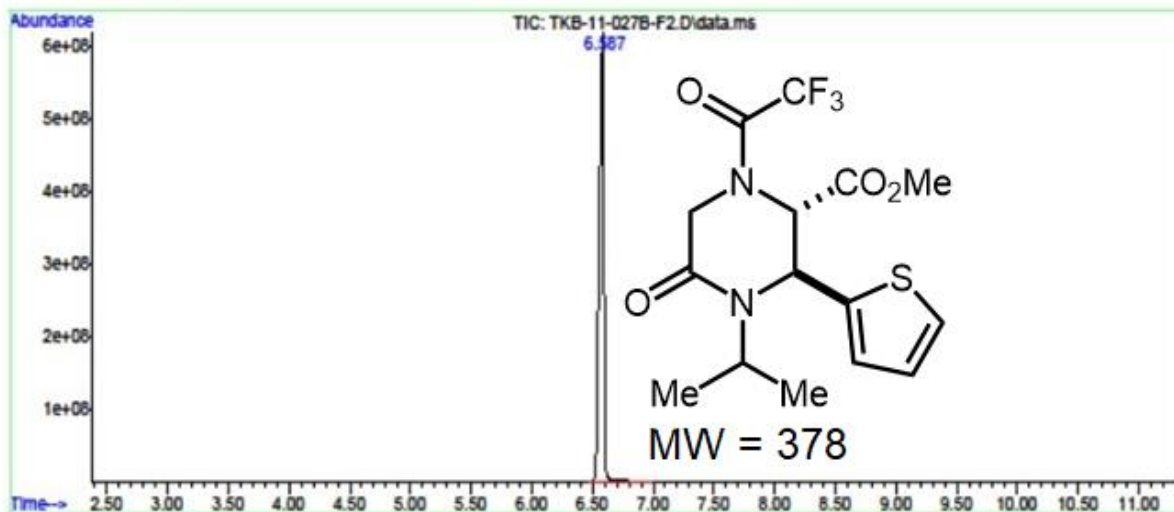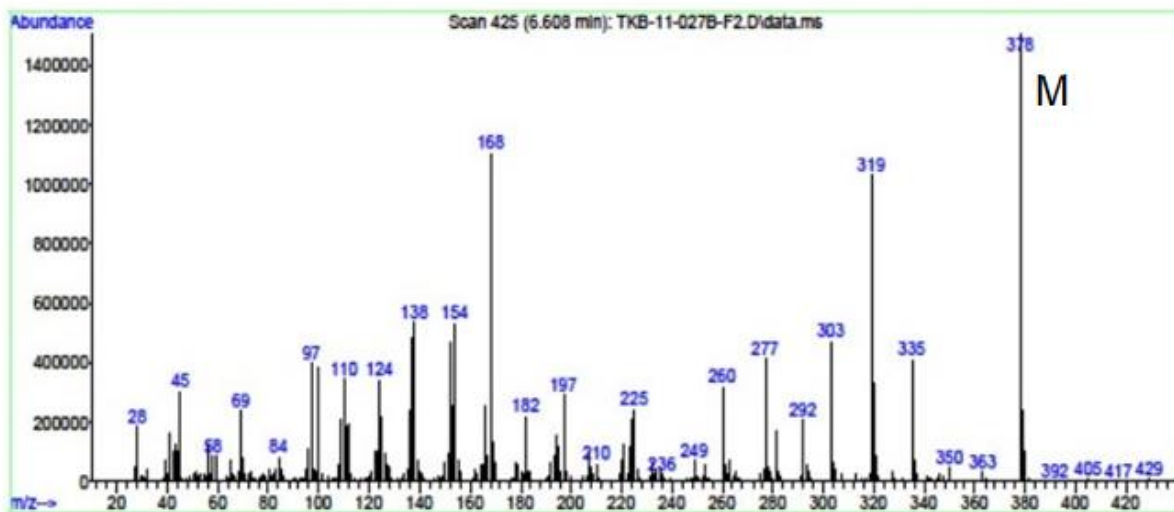

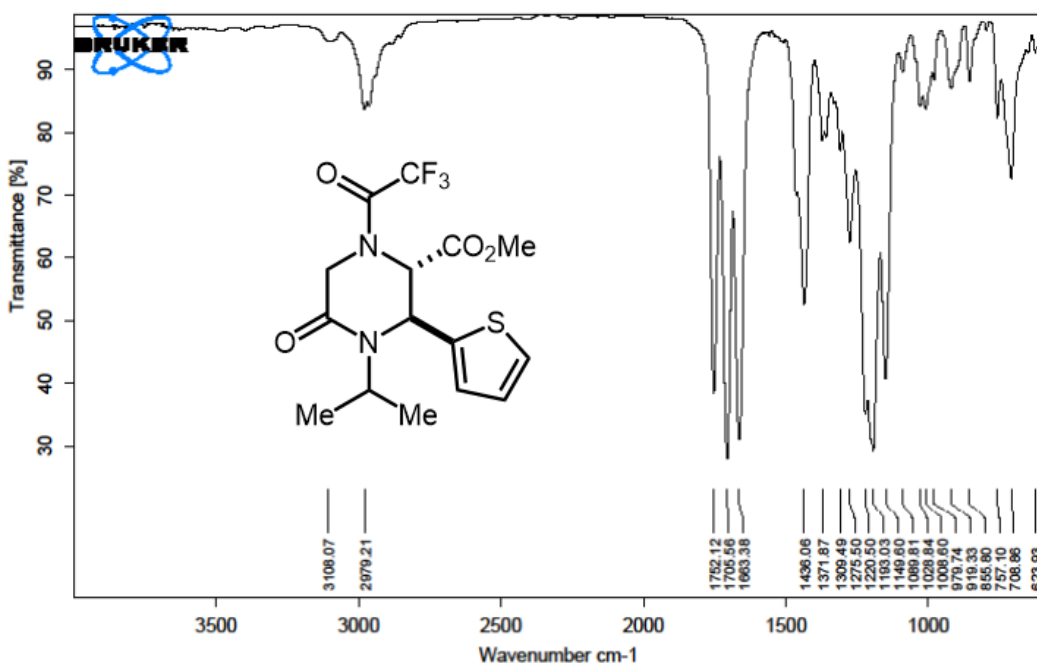

C:\Users\Public\Documents\Bruker\OPUS\_7.5.18\DATA\MEAS\TKB-11-027B-f2.0 TKB-11-027B-f2 Instrument type and / or accessory 10/14/2018

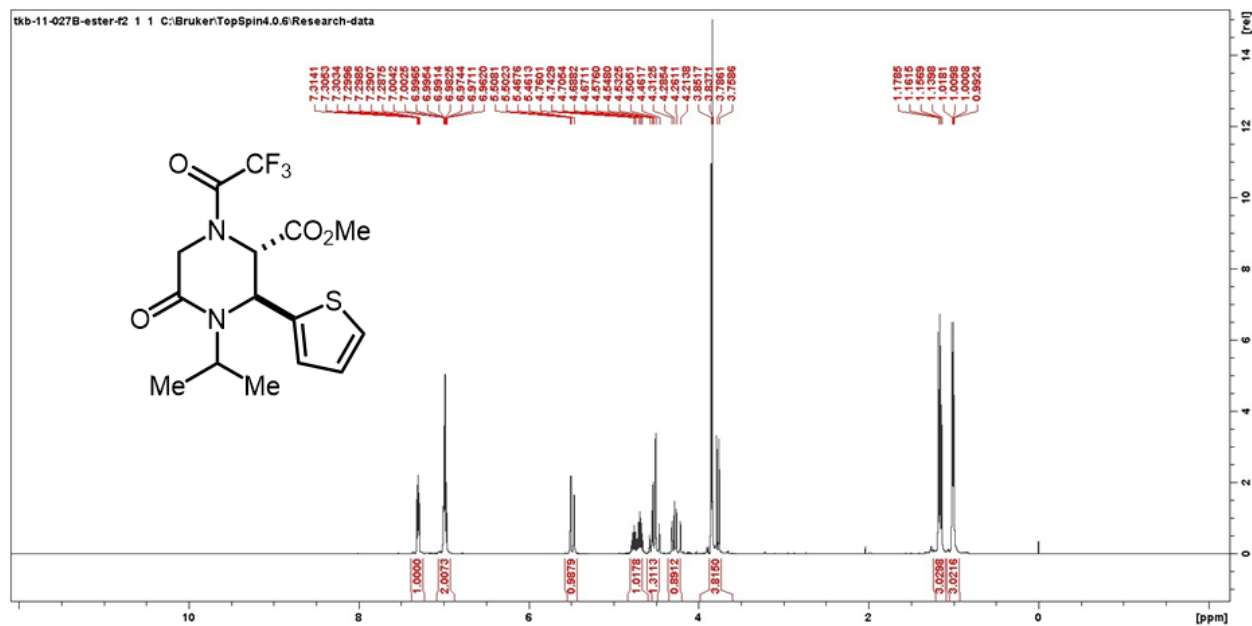



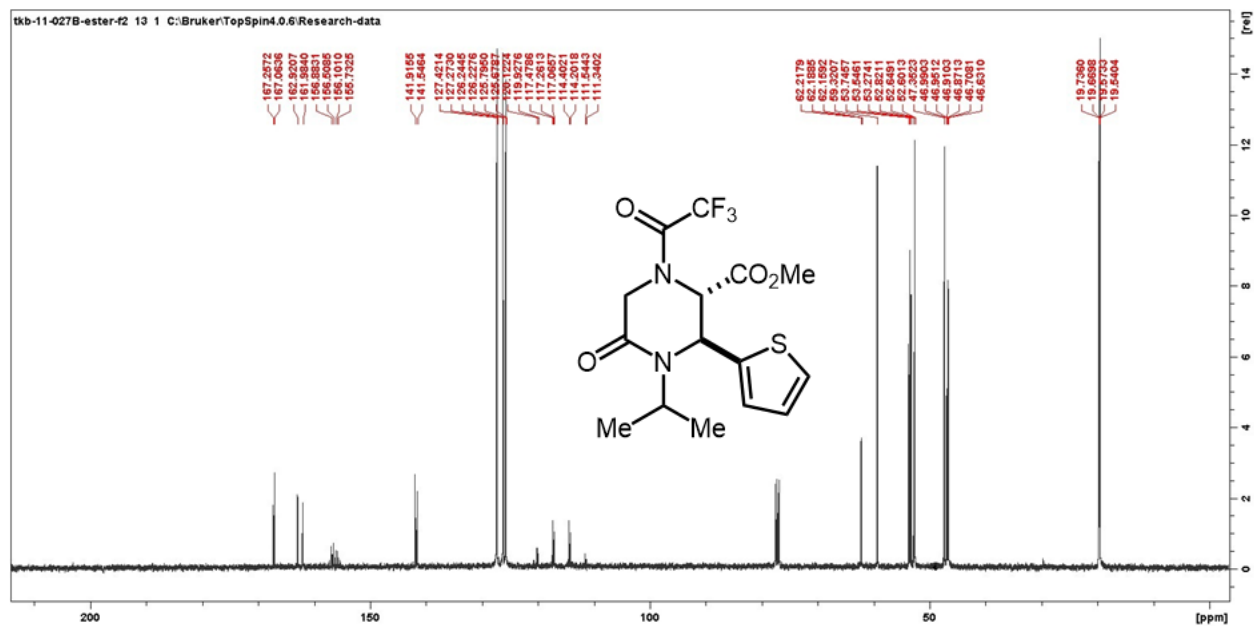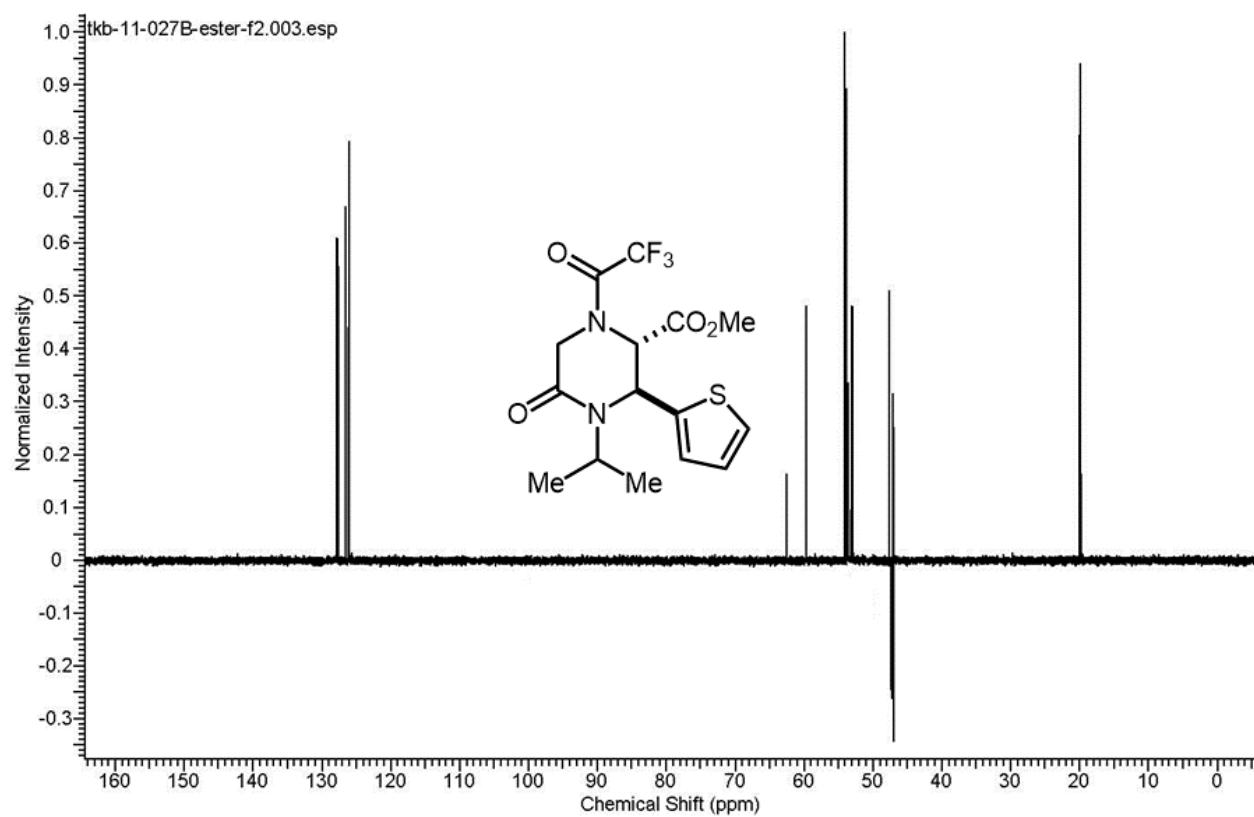

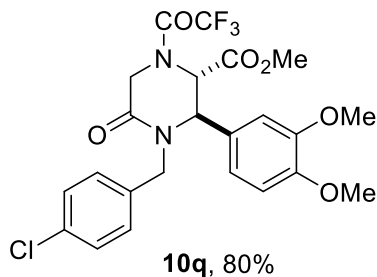

Prepared in 0.5 mmol scale using General Procedure B. Purification: Flash chromatography on silica eluting with hexane/EtOAc (20:80). Yield = 206 mg, 80%, 95:5 dr.  $^1\text{H}$  NMR (400 MHz,  $\text{CDCl}_3$ , mixture of rotamers)  $\delta$  7.29 – 7.24 (m, 2H), 7.20 – 7.07 (m, 2H), 6.85 (dd,  $J = 8.3, 5.9$  Hz, 1H), 6.67 (td,  $J = 8.2, 2.2$  Hz, 1H), 6.57 (dd,  $J = 6.6, 2.2$  Hz, 1H), 5.51 (t,  $J = 14.6$  Hz, 1H), 5.35 – 5.28 (m, 1H), 4.91 (dd,  $J = 9.9, 2.1$  Hz, 1H), 4.75 – 4.66 (m, 2H), 3.89 (s, 3H), 3.86 (s, 3H), 3.53 (s, 3H), 3.48 (dd,  $J = 14.6, 3.1$  Hz, 1H).  $^{13}\text{C}$  NMR (101 MHz,  $\text{CDCl}_3$ , mixture of rotamers)  $\delta$  167.1, 167.0, 163.9, 162.9, 156.6, 156.2, 156.0, 155.7, 149.9, 149.8, 134.2, 134.0, 130.3, 130.2, 129.0, 127.8, 127.3, 120.1, 118.2, 117.2, 116.9, 114.4, 114.1, 111.7, 111.6, 108.8, 108.7, 61.0, 60.9, 59.6, 58.8, 57.9, 56.2, 56.1, 56.0, 53.3, 53.1, 47.7, 47.6, 46.7, 46.6, 45.9. **HRMS-EI $^+$**  ( $m/z$ ): calc'd for  $\text{C}_{23}\text{H}_{22}\text{ClF}_3\text{N}_2\text{O}_6$  514.1118; found 514.1123.

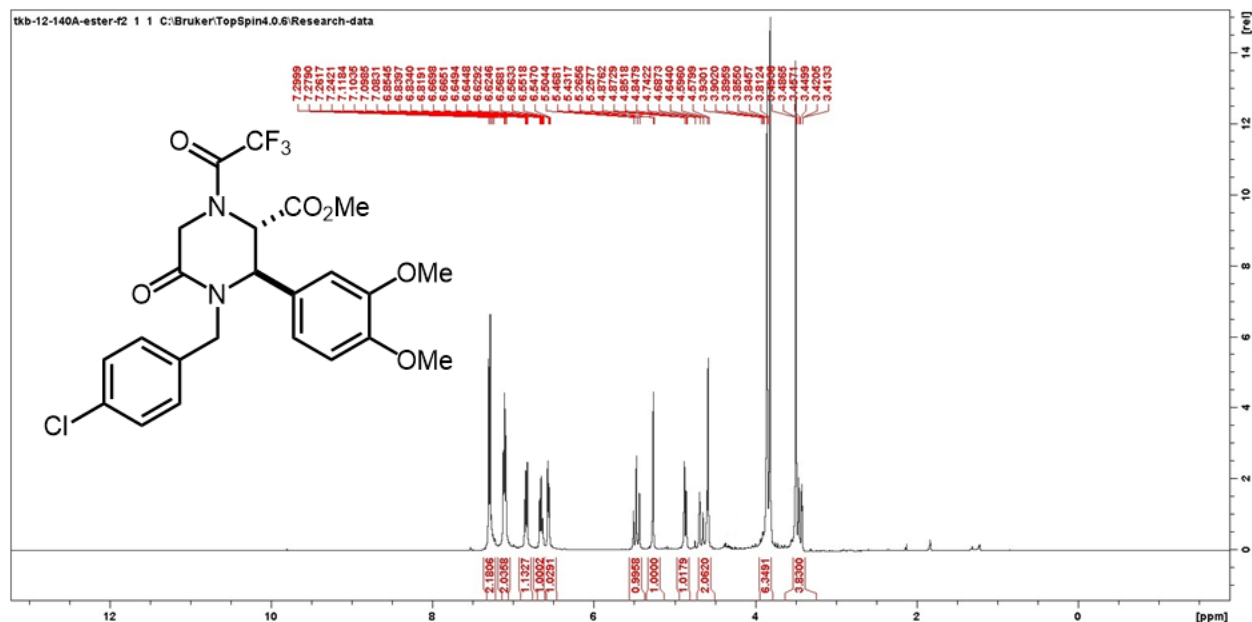

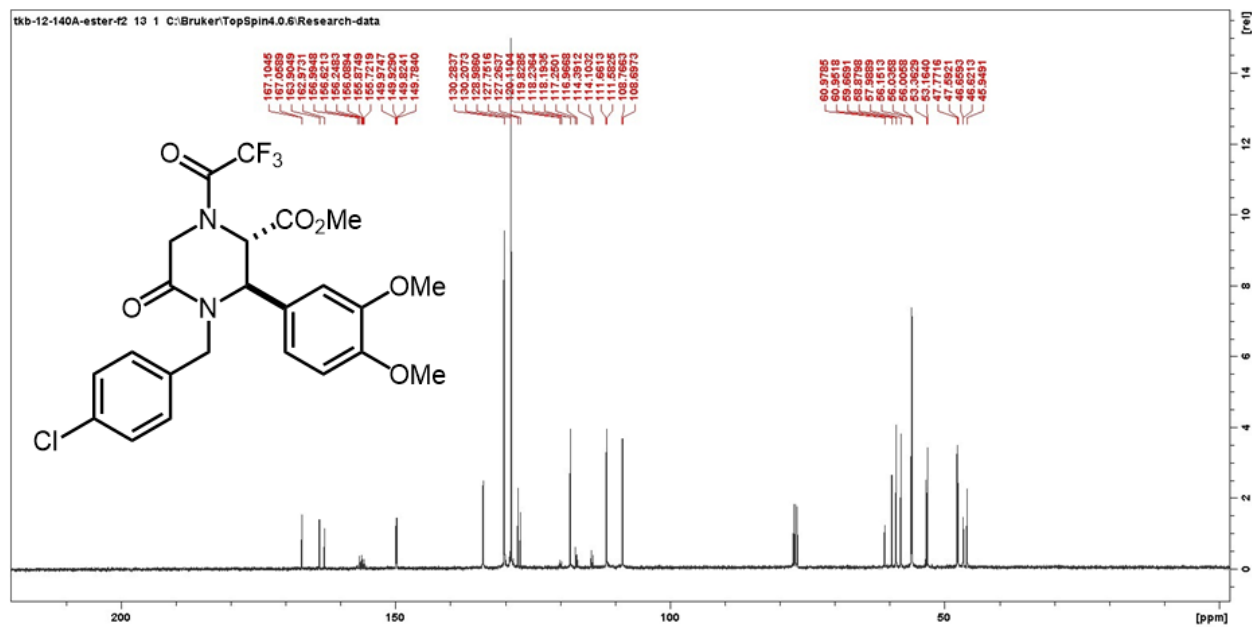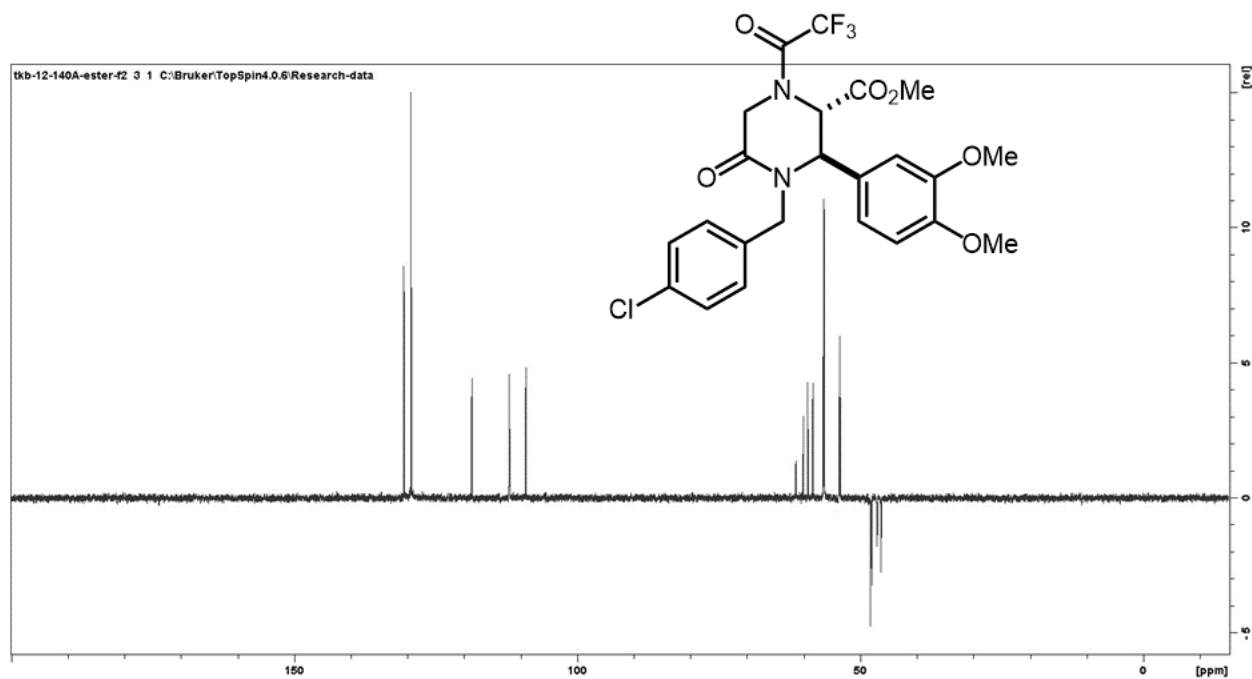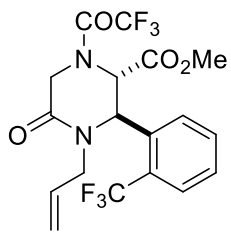

10r, 61%

Prepared in 0.5 mmol scale using General Procedure B. Purification: Flash chromatography on silica eluting with hexane/EtOAc (50:50). Yield = 133.7 mg, 61%, 95:5 dr.  $^1\text{H}$  NMR (400 MHz,  $\text{CDCl}_3$ , mixture of rotamers)  $\delta$  7.74 (ddd,  $J = 9.4, 7.8, 1.4$  Hz, 1H), 7.69 – 7.37 (m, 2H), 7.12 (t,  $J = 8.3$  Hz, 1H), 5.70 – 5.54 (m, 2H), 5.37 (s, 0.5H), 5.30 – 5.18 (m, 2H), 4.75 – 4.56 (m, 3H), 4.31 – 4.20 (m, 0.5H), 3.84 (s, 3H), 3.08 – 2.94 (m, 1H).  $^{13}\text{C}$  NMR (101 MHz,  $\text{CDCl}_3$ , rotamers)  $\delta$  166.7, 166.6, 163.3, 162.5, 156.9, 156.5, 156.3, 156.2, 155.9, 155.8, 155.5, 134.7, 134.4, 132.9, 132.6, 130.6, 130.5, 129.6, 129.5, 128.3, 128.2, 128.1, 128.0, 127.8, 127.7, 127.3, 127.2, 127.1, 127.0, 126.8, 125.5, 125.4, 122.8, 122.7, 120.2, 120.1, 119.0, 117.2, 116.9, 114.4, 113.9, 111.5, 111.1, 59.5, 59.4, 56.5, 55.9, 55.2, 55.18, 55.15, 55.13, 53.9, 53.6, 48.1, 47.9, 46.6, 45.6. **HRMS-EI<sup>+</sup>** ( $m/z$ ): calc'd for  $\text{C}_{18}\text{H}_{16}\text{F}_6\text{N}_2\text{O}_4$  438.1014; found 438.1018.

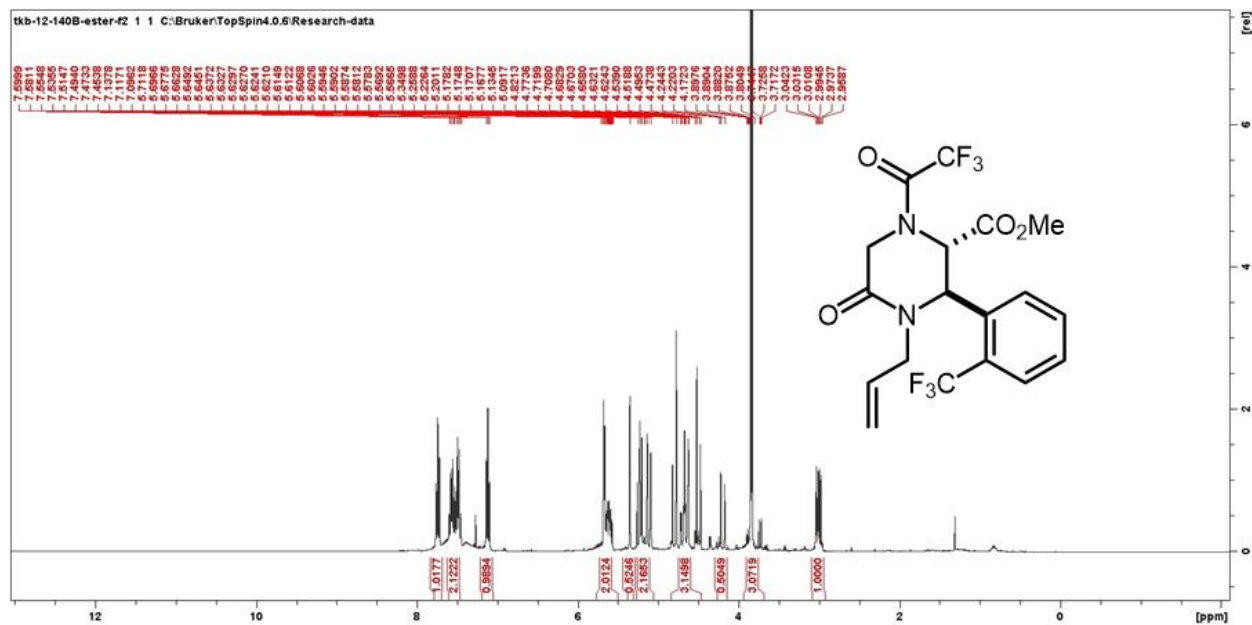

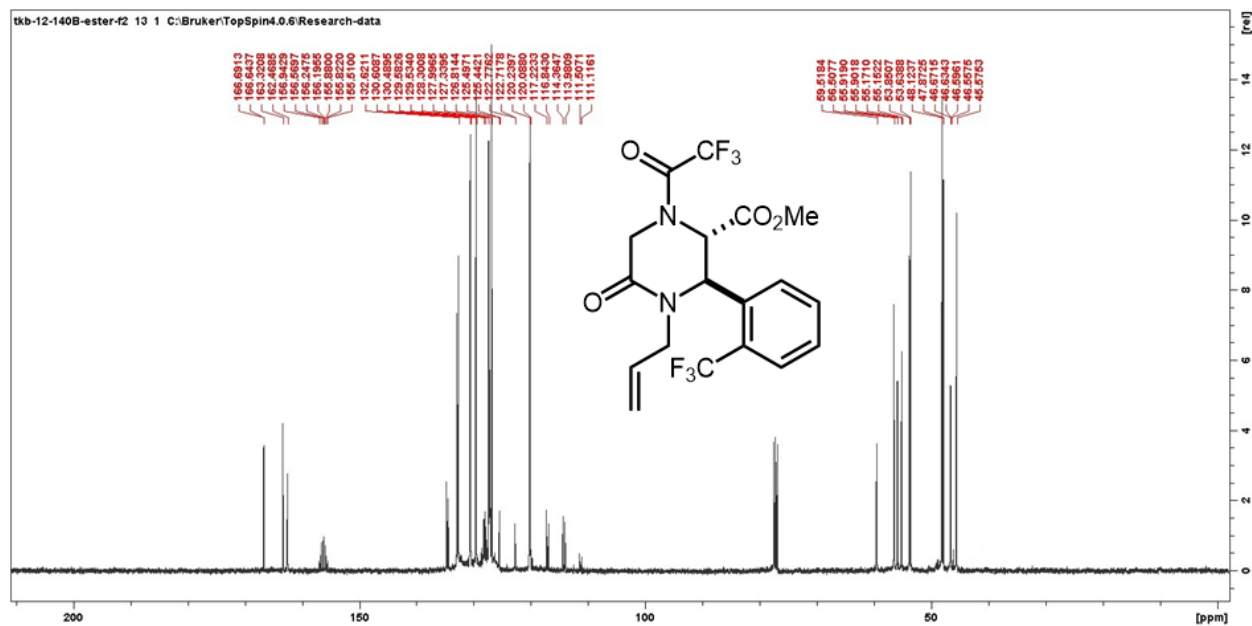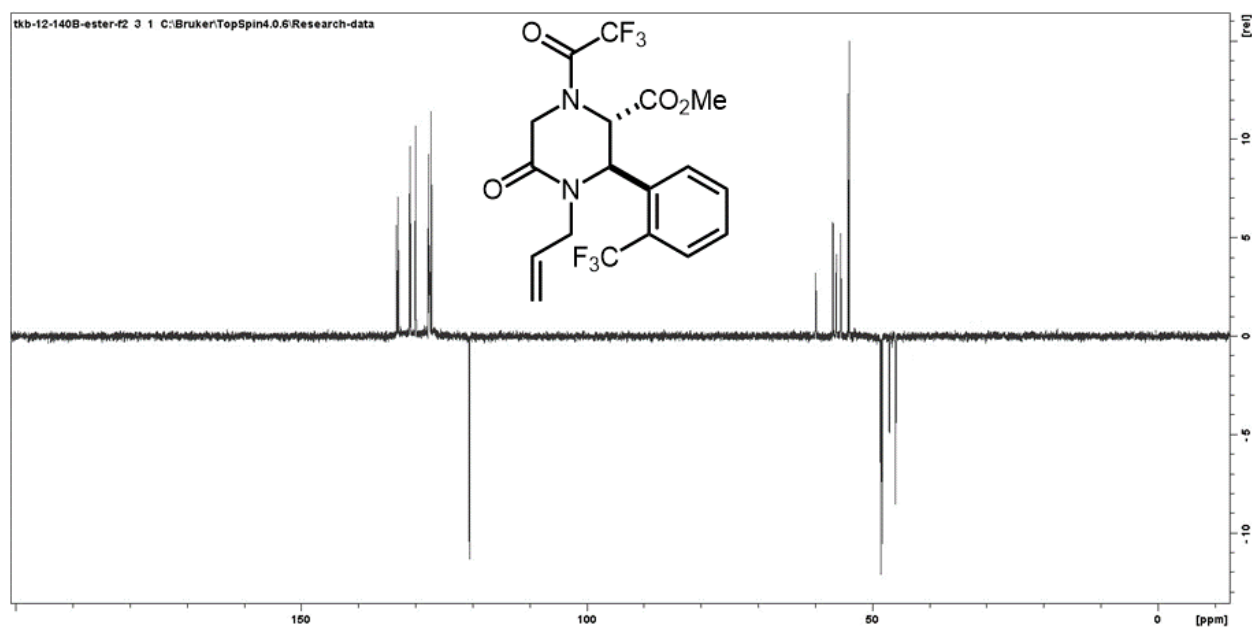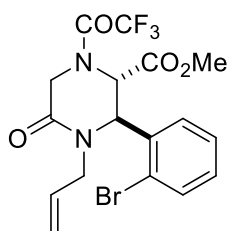**10s**, 65%

Prepared in 0.5 mmol scale using General Procedure B. Purification: Flash chromatography on silica eluting with hexane/EtOAc (60:40). Yield = 146 mg, 65%, 95:5 dr. <sup>1</sup>H NMR (400 MHz,

$\text{CDCl}_3$ )  $\delta$  7.46 (td,  $J = 8.0, 1.3$  Hz, 1H), 7.23 – 6.97 (m, 2H), 6.79 (dd,  $J = 7.7, 1.7$  Hz, 1H), 5.57 – 5.40 (m, 2H), 5.15 – 4.90 (m, 2H), 4.87 (d,  $J = 2.0$  Hz, 0.5H), 4.65 – 4.31 (m, 3H), 4.01 (d,  $J = 1.1$  Hz, 0.5H), 3.69 (s, 3H), 2.95 – 2.84 (m, 1H).  $^{13}\text{C}$  NMR (101 MHz,  $\text{CDCl}_3$ )  $\delta$  167.09, 167.03, 163.85, 162.96, 156.57, 156.20, 155.83, 134.56, 134.16, 134.13, 133.99, 130.88, 130.82, 130.76, 130.68, 128.50, 128.14, 127.05, 126.60, 122.94, 122.68, 120.36, 120.30, 119.18, 117.20, 116.92, 114.34, 114.06, 111.48, 111.20, 59.63, 58.84, 58.29, 58.26, 55.63, 53.81, 53.61, 48.09, 47.84, 46.63, 46.59, 45.77. **HRMS-EI<sup>+</sup>** ( $m/z$ ): calc'd for  $\text{C}_{17}\text{H}_{16}\text{BrF}_3\text{N}_2\text{O}_4$  448.0246; found 448.0242.

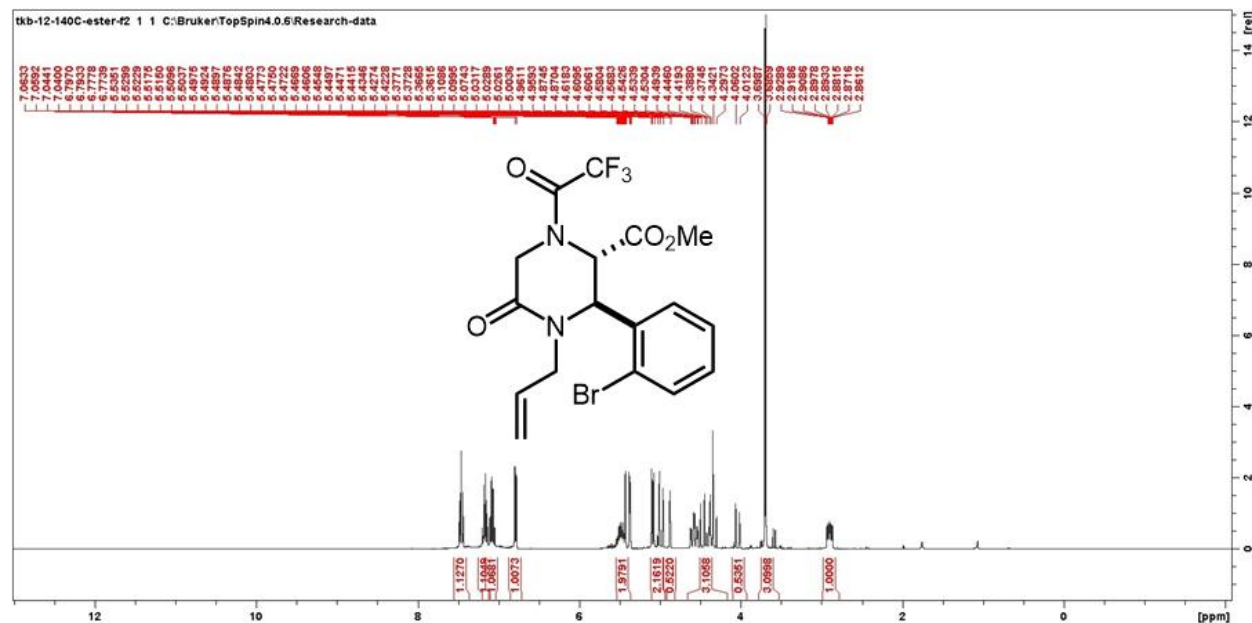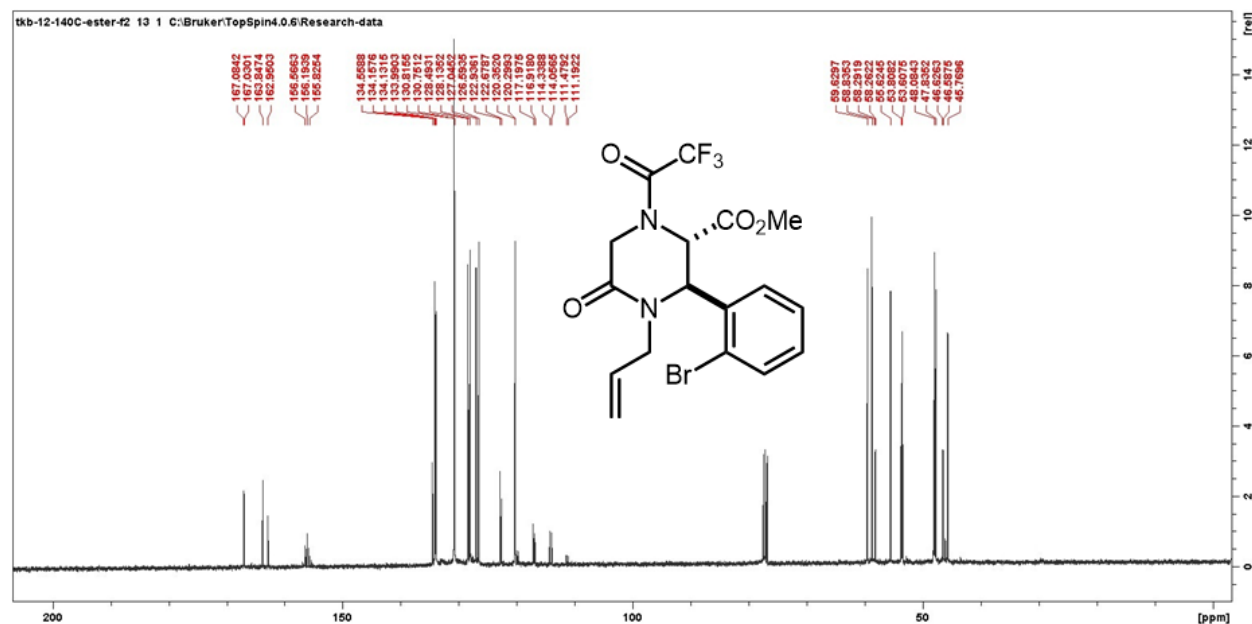

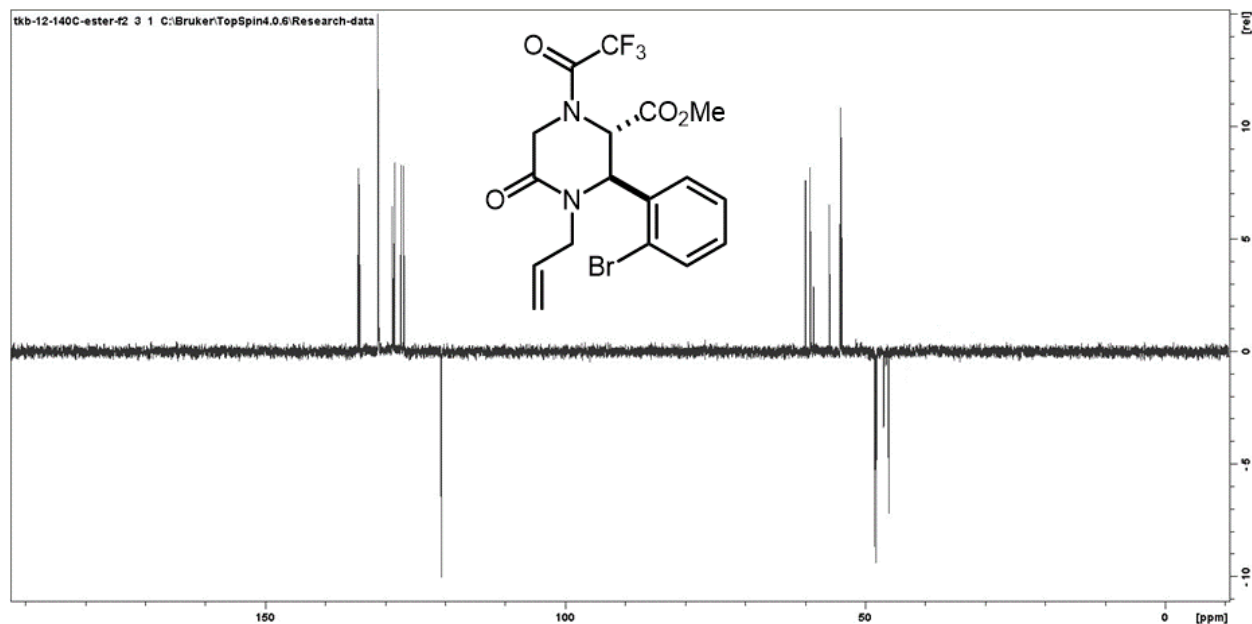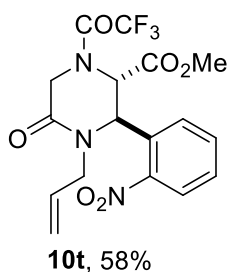

Prepared in 0.5 mmol scale using General Procedure B. Purification: Flash chromatography on silica eluting with hexane/EtOAc (25:75). Yield = 120.4 mg, 58%, 95:5 dr.  $^1\text{H}$  NMR (400 MHz,  $\text{CDCl}_3$ )  $\delta$  8.19 (dd,  $J = 8.2, 2.5$  Hz, 1H), 7.72 – 7.58 (m, 2H), 7.21 (dt,  $J = 7.9, 1.5$  Hz, 1H), 5.96 (d,  $J = 1.7$  Hz, 1H), 5.72 – 5.56 (m, 1H), 5.32 – 5.18 (m, 2H), 5.14 (d,  $J = 10.1$  Hz, 1H), 4.75 – 4.21 (m, 3H), 3.93 (s, 3H), 3.22 (ddd,  $J = 14.9, 8.0, 3.4$  Hz, 1H).  $^{13}\text{C}$  NMR (101 MHz,  $\text{CDCl}_3$ )  $\delta$  166.64, 163.84, 163.02, 156.58, 156.31, 156.21, 155.94, 148.17, 148.15, 134.61, 134.27, 131.77, 131.43, 130.69, 130.56, 130.54, 130.48, 127.99, 127.46, 126.46, 126.20, 120.57, 120.50, 120.06, 119.77, 117.20, 116.91, 114.34, 114.05, 111.48, 59.20, 59.17, 56.45, 56.32, 55.65, 54.00, 53.80, 48.43, 48.18, 46.73, 46.70, 45.65. **HRMS-EI<sup>+</sup>** ( $m/z$ ): calc'd for  $\text{C}_{17}\text{H}_{16}\text{F}_3\text{N}_3\text{O}_6$  415.0991; found 415.0996.

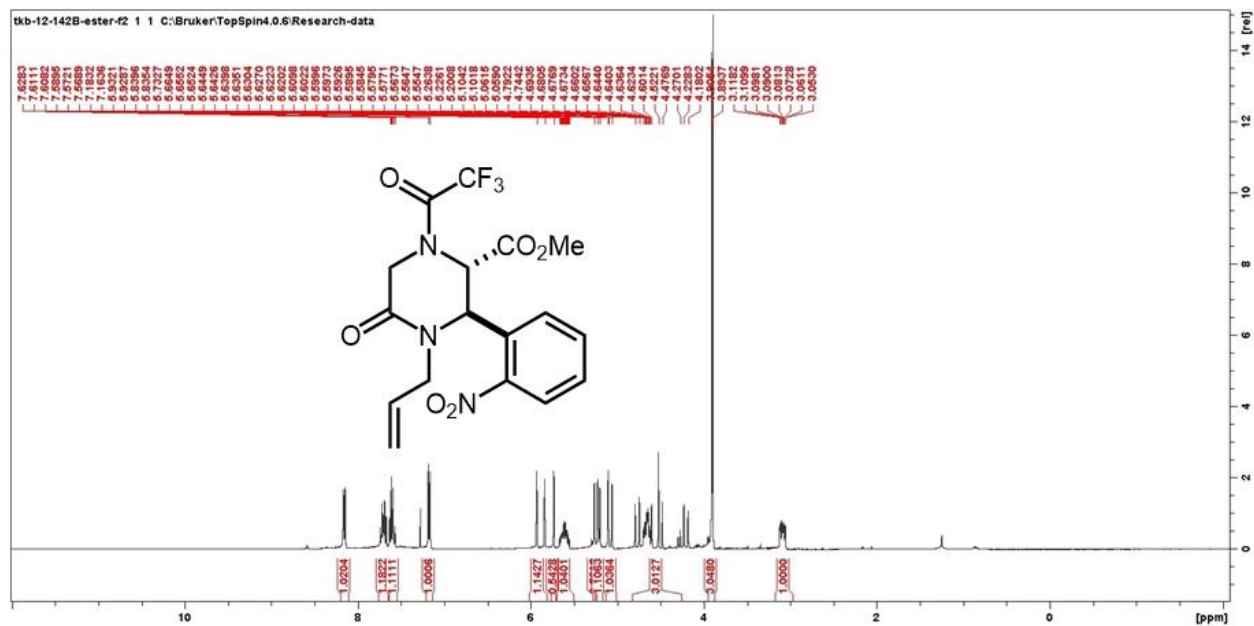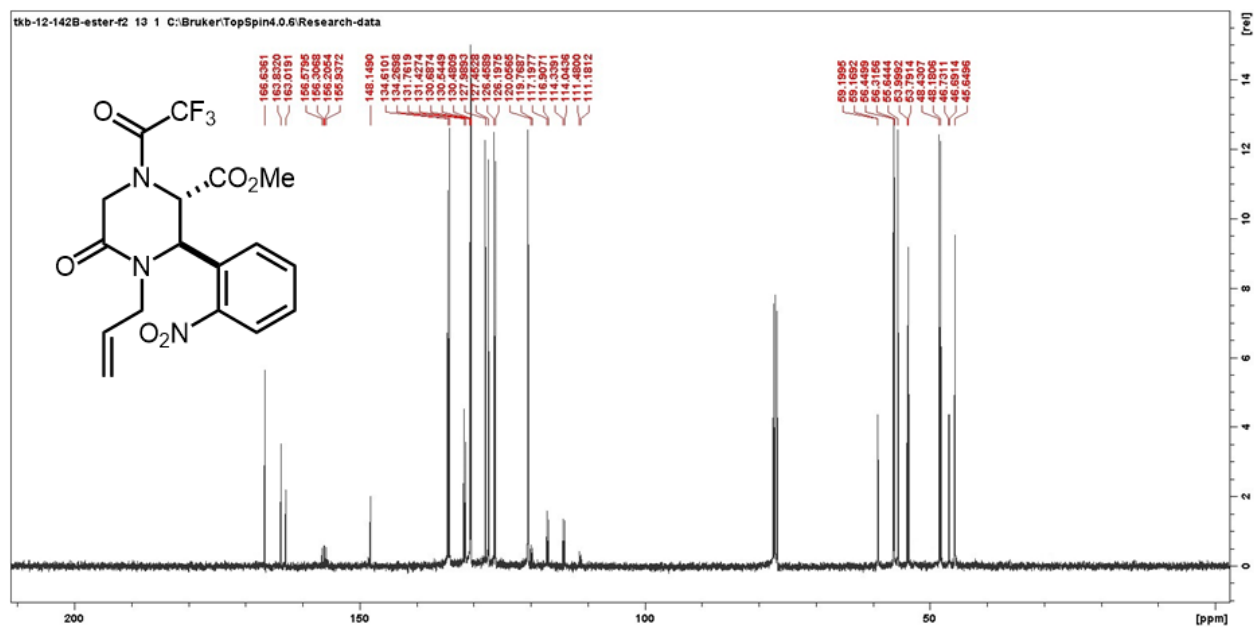



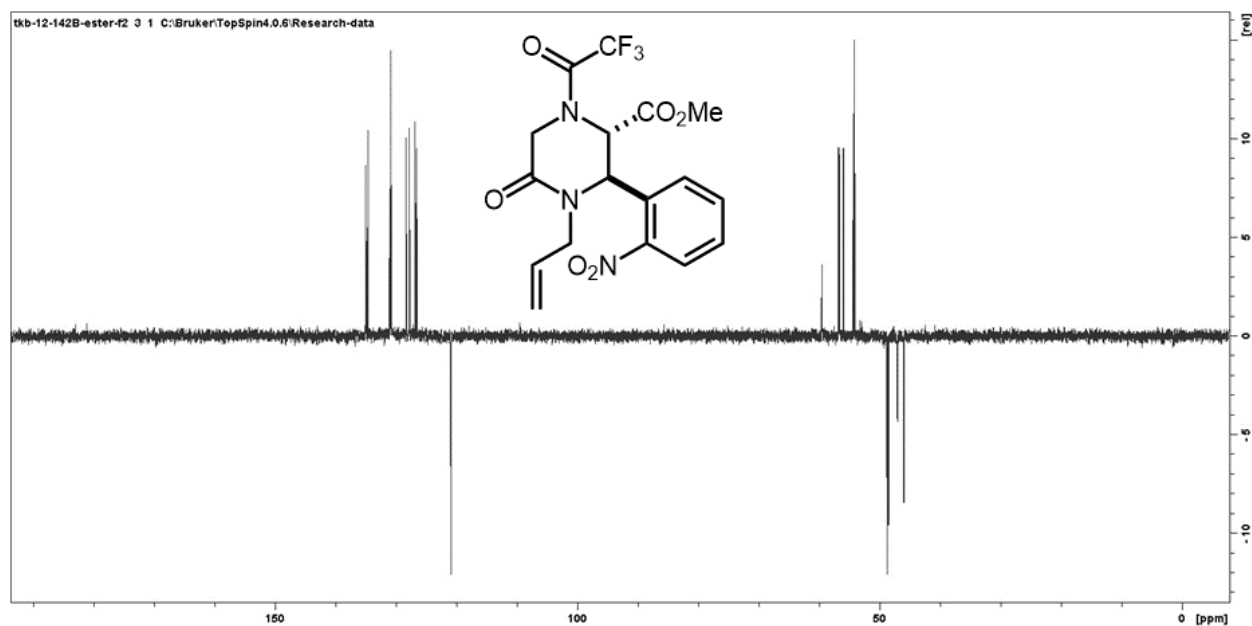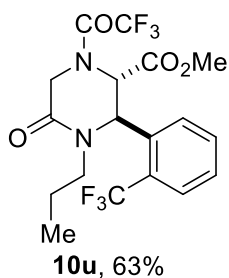

Prepared in 0.5 mmol scale using General Procedure B. Purification: Flash chromatography on silica eluting with hexane/EtOAc (50:50). Yield = 138.7 mg, 63%, 95:5 dr. <sup>1</sup>H NMR (400 MHz, CDCl<sub>3</sub>, mixture of rotamers) δ 7.79 – 7.70 (m, 1H), 7.70 – 7.34 (m, 2H), 7.10 (t, *J* = 8.5 Hz, 1H), 5.69 (dd, *J* = 5.9, 1.8 Hz, 1H), 5.37 (s, 0.5H), 4.82 – 4.53 (m, 1.5H), 4.46 + 41.8 (d, *J* = 18.0 Hz, 1H), 3.94 – 3.79 (m, 4H), 2.46 (m, 1H), 1.63 – 1.39 (m, 2H), 0.82 (t, *J* = 7.4 Hz, 3H). <sup>13</sup>C NMR (101 MHz, CDCl<sub>3</sub>, mixture of rotamers) δ 166.75, 166.72, 163.49, 162.59, 156.61, 156.24, 155.91, 155.54, 134.99, 134.71, 132.90, 132.63, 129.56, 129.51, 128.29, 128.08, 127.99, 127.78, 127.32, 127.20, 127.14, 127.12, 127.08, 127.06, 127.02, 127.00, 126.94, 126.79, 125.58, 125.52, 122.86, 122.80, 120.10, 119.72, 117.24, 116.86, 114.38, 114.00, 111.52, 111.14, 59.52, 56.47, 56.44, 56.42, 55.59, 55.57, 55.55, 53.98, 53.76, 47.59, 47.36, 46.58, 46.54, 45.52, 20.03, 19.99, 11.06, 11.03. **HRMS-EI<sup>+</sup>** (*m/z*): calc'd for C<sub>18</sub>H<sub>18</sub>F<sub>6</sub>N<sub>2</sub>O<sub>4</sub> 440.1171; found 440.1176.



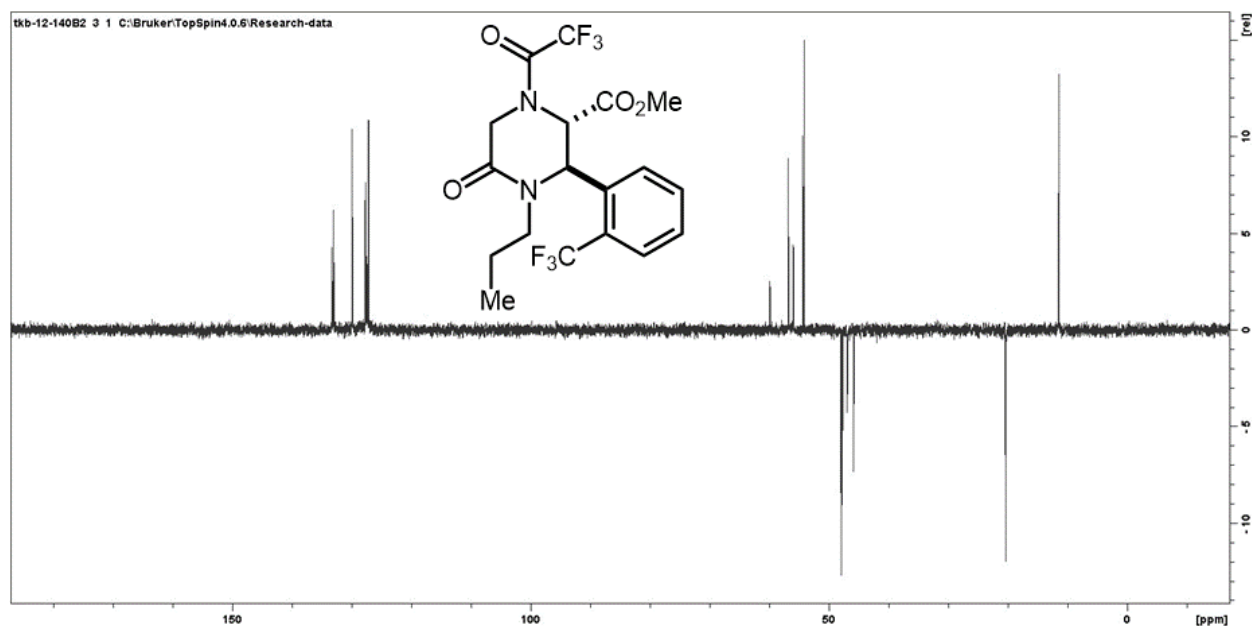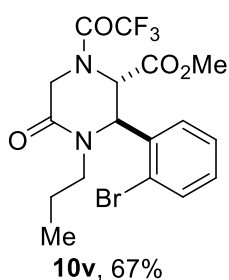

Prepared in 0.5 mmol scale using General Procedure B. Purification: Flash chromatography on silica eluting with hexane/EtOAc (60:40). Yield = 151.2 mg, 67%, 95:5 dr.  $^1\text{H}$  NMR (400 MHz,  $\text{CDCl}_3$ , mixture of rotamers)  $\delta$  7.62 (td,  $J = 8.1, 1.3$  Hz, 1H), 7.41 – 7.08 (m, 2H), 6.94 (dd,  $J = 7.7, 1.6$  Hz, 1H), 5.61 – 5.09 (m, 2H), 4.64 – 4.19 (m, 2H), 4.01 – 3.88 (m, 4H), 2.51 (m, 1H), 1.63 – 1.44 (m, 2H), 0.85 (t,  $J = 7.4$  Hz, 3H).  $^{13}\text{C}$  NMR (101 MHz,  $\text{CDCl}_3$ , mixture of rotamers)  $\delta$  167.19, 167.10, 164.19, 163.28, 156.57, 156.19, 155.81, 134.74, 134.32, 134.13, 133.97, 130.87, 130.81, 128.52, 128.15, 127.05, 126.59, 122.89, 122.65, 120.05, 119.80, 117.19, 116.93, 114.33, 114.07, 111.47, 111.21, 60.55, 59.69, 58.29, 58.26, 55.61, 53.90, 53.68, 47.84, 47.58, 46.56, 46.52, 45.74, 20.28, 20.22, 11.14, 11.11. **HRMS-EI<sup>+</sup>** ( $m/z$ ): calc'd for  $\text{C}_{17}\text{H}_{18}\text{BrF}_3\text{N}_2\text{O}_4$  450.0402; found 450.0408.

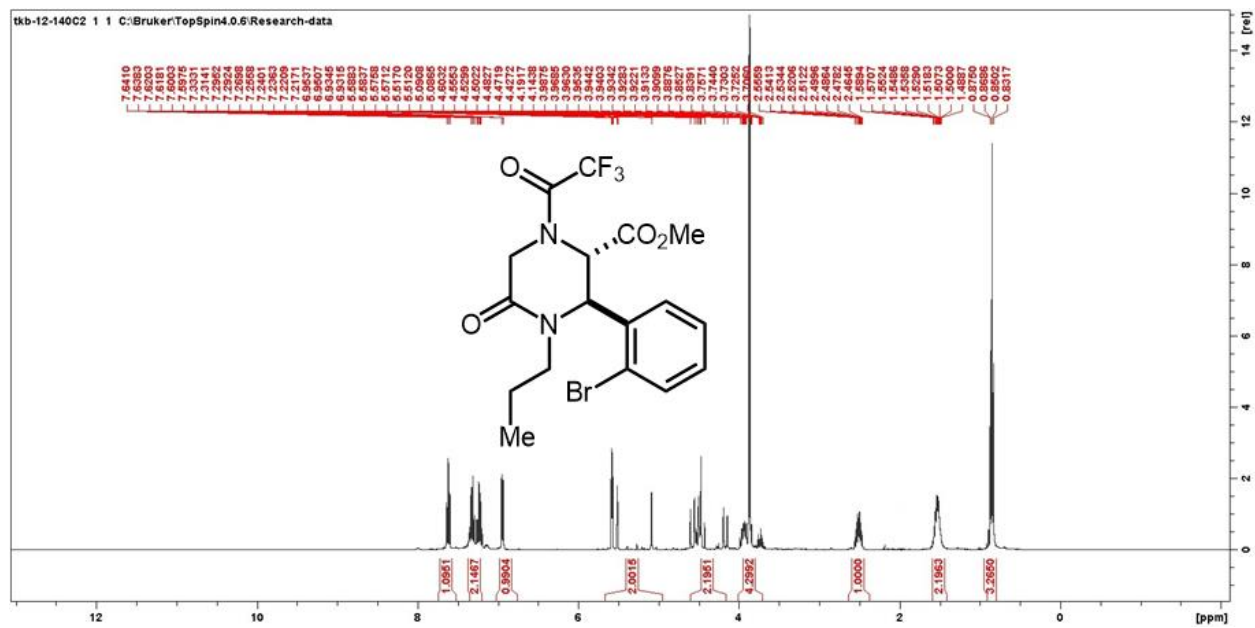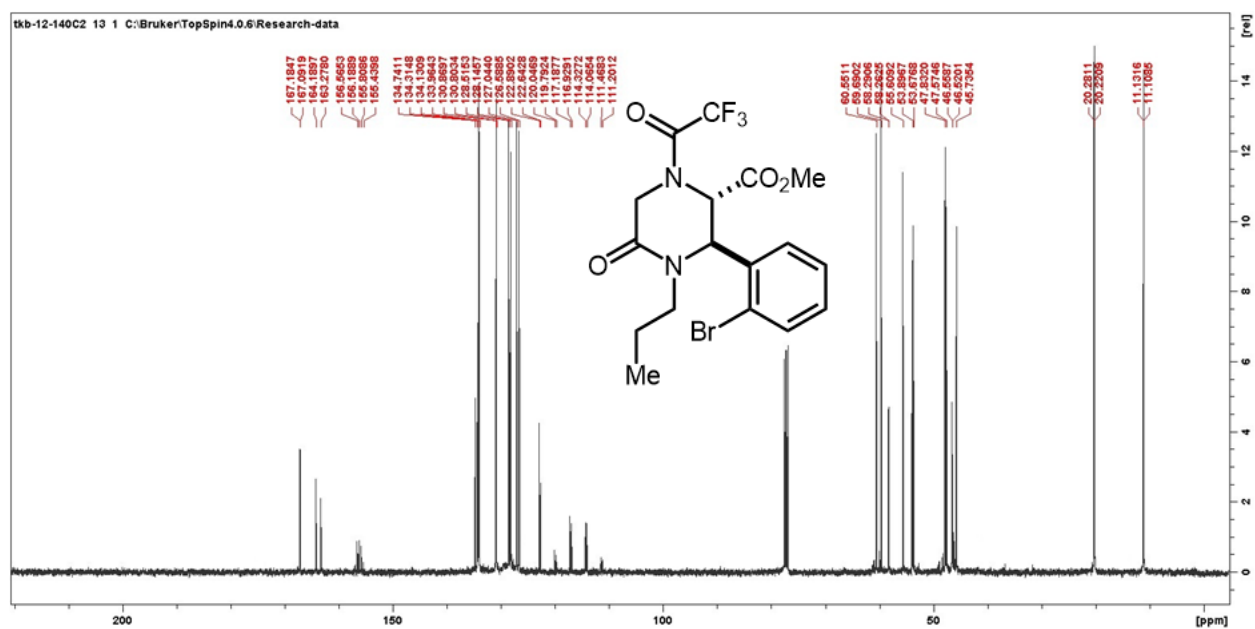

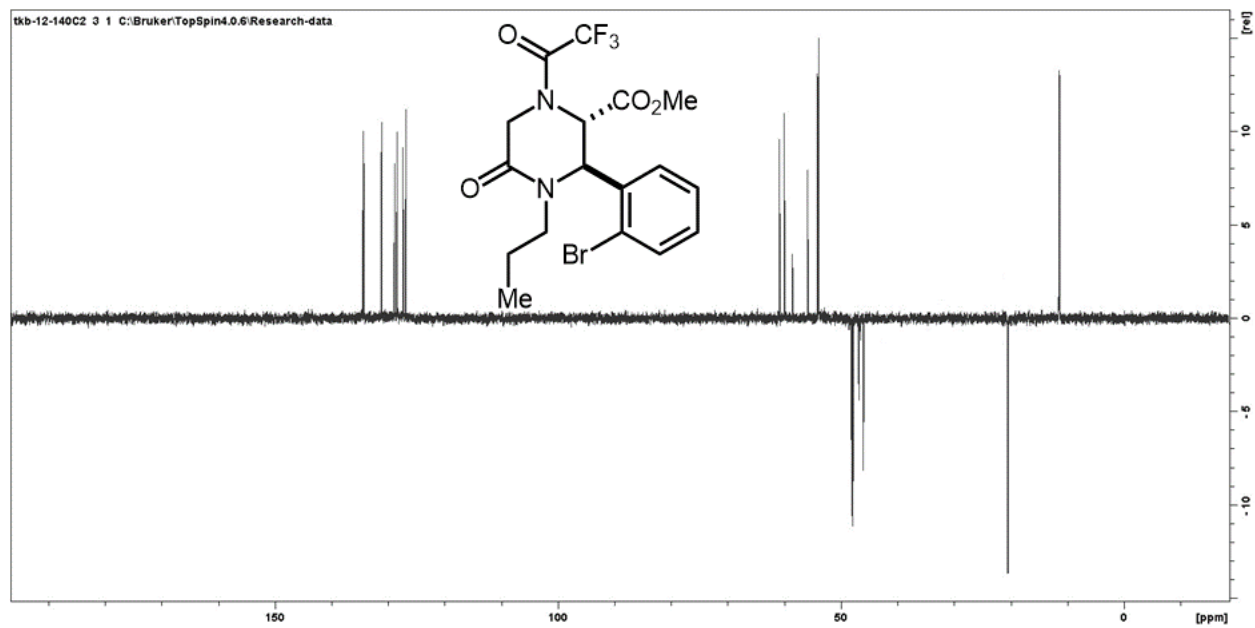

## With 1,3-azadienes

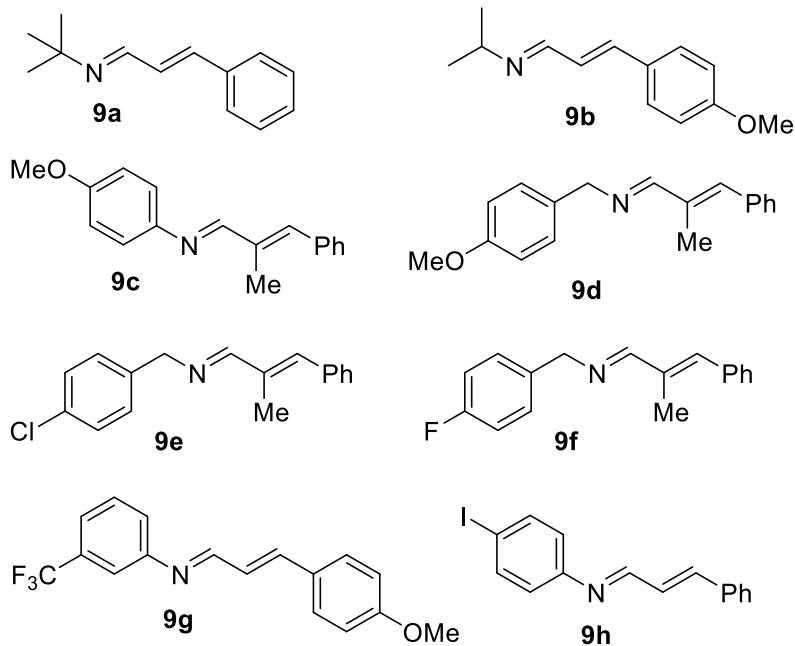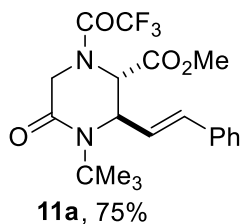

Prepared from 1,3-azadiene **9a** (936.5 mg, 5.0 mmol) and anhydride **7** (1.056 g, 1.0 equiv) using General Procedure B. T = 100 °C, time = 8 h. Purification: Flash chromatography on silica eluting with hexane/EtOAc (50:50). Yield = 1.463 g, 75%, 95:5 dr.  $^1\text{H}$  NMR (400 MHz, Chloroform-*d*, mixture of rotamers)  $\delta$  7.35 – 7.23 (m, 5H), 6.65 – 6.53 (m, 1H), 6.10 (ddd,  $J$  = 15.9, 5.2, 2.8 Hz, 1H), 5.25 (d,  $J$  = 2.7 Hz, 1H), 5.15 – 5.05 (m, 1H), 4.35 (q,  $J$  = 17.0 Hz, 1H), 4.18 (d,  $J$  = 7.2 Hz, 1H), 3.71 (s, 3H), 1.46 (s, 9H).  $^{13}\text{C}$  NMR (101 MHz,  $\text{CDCl}_3$ , rotamers)  $\delta$  165.0, 164.8, 161.0, 160.2, 153.4, 152.3, 132.0, 131.0, 130.5, 125.8, 125.7, 123.6, 122.6, 114.31, 111.45, 56.0, 55.8, 55.3, 52.8, 50.5, 50.3, 44.9, 44.9, 25.0, 24.9. **HRMS-EI<sup>+</sup>** ( $m/z$ ): calc'd for  $\text{C}_{20}\text{H}_{23}\text{F}_3\text{N}_2\text{O}_4$  412.1610; found 412.1616.

File :C:\GCMS\Beng Research\Data\TKB-11-022B2-F3.D  
 Operator : Beng  
 Acquired : 31 Oct 2018 19:51 using AcqMethod 150-250\_NEW.M  
 Instrument : Instrument #1  
 Sample Name:  
 Misc Info :  
 Vial Number: 1

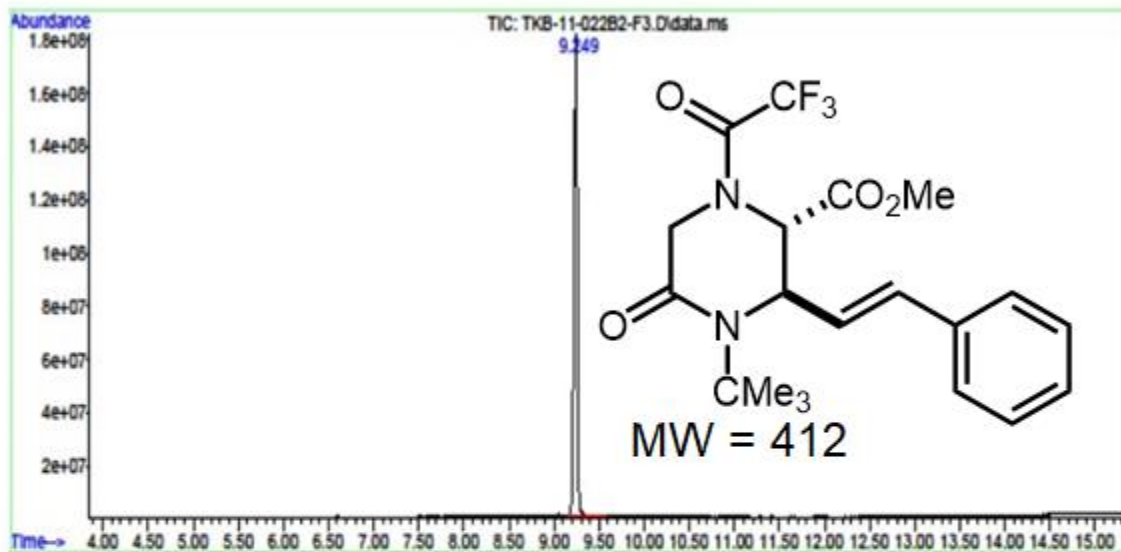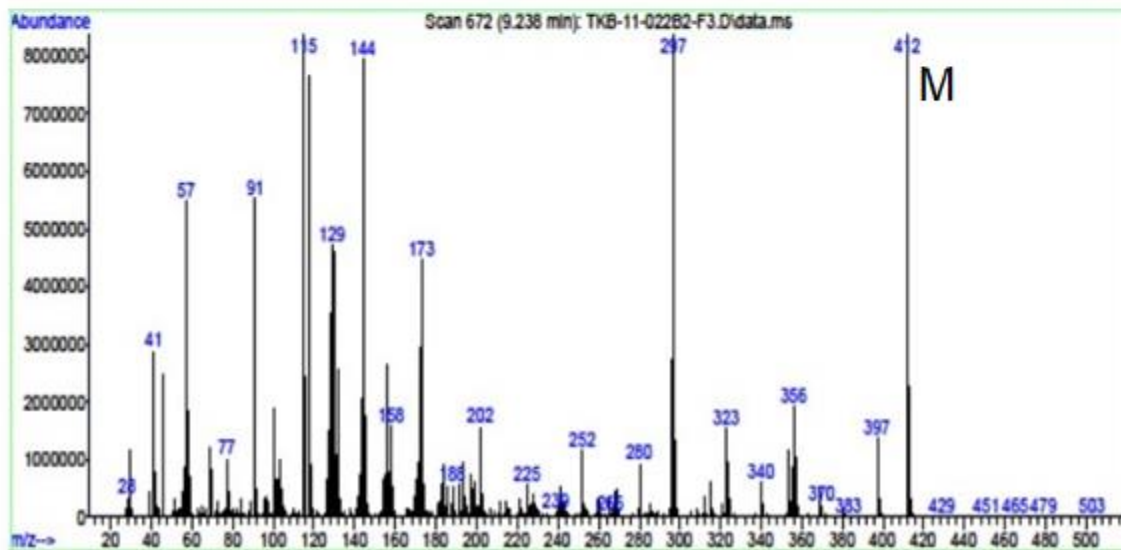

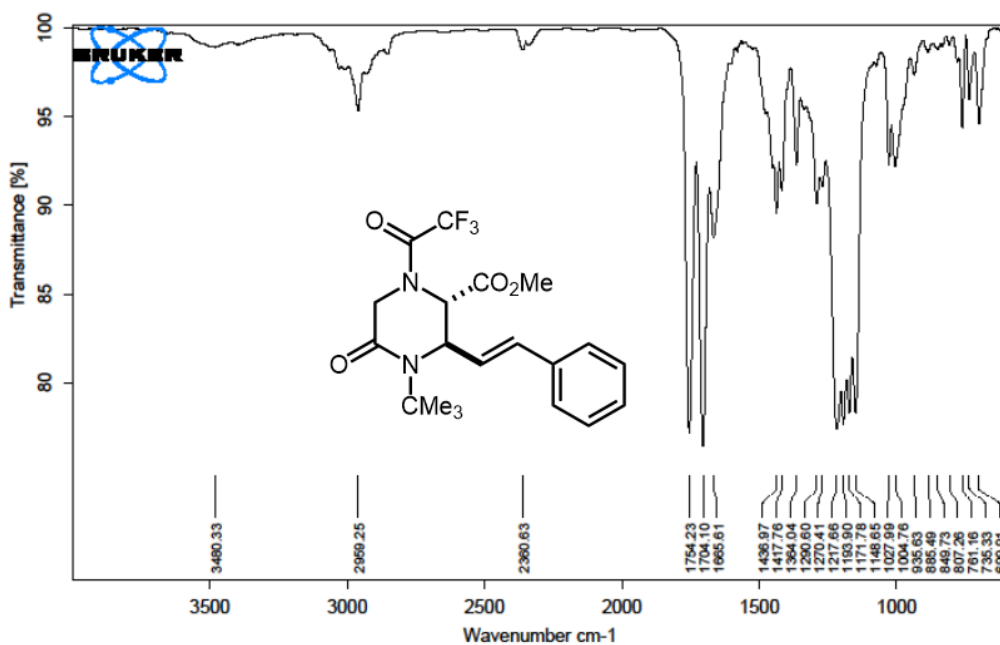

Page 1/1

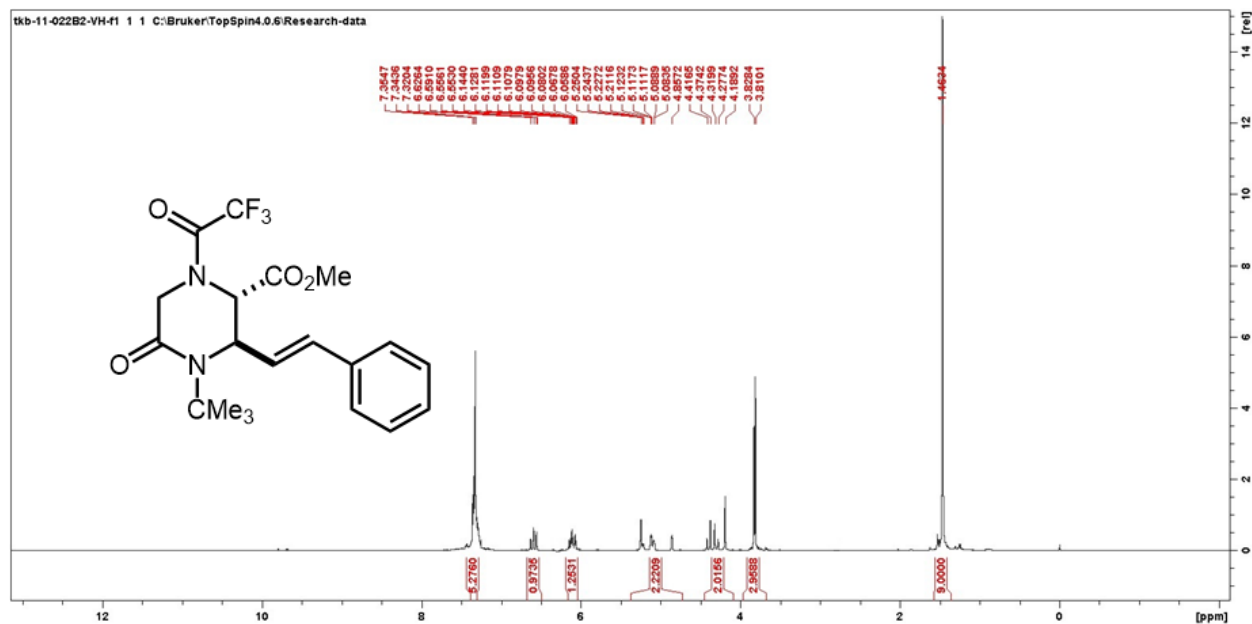



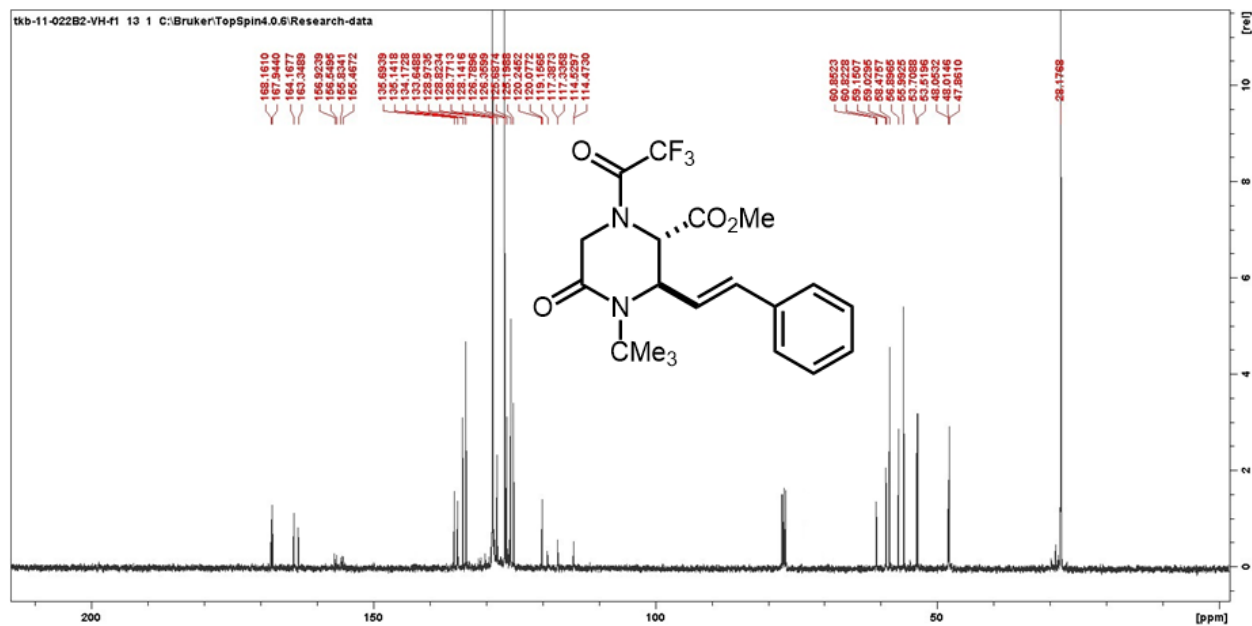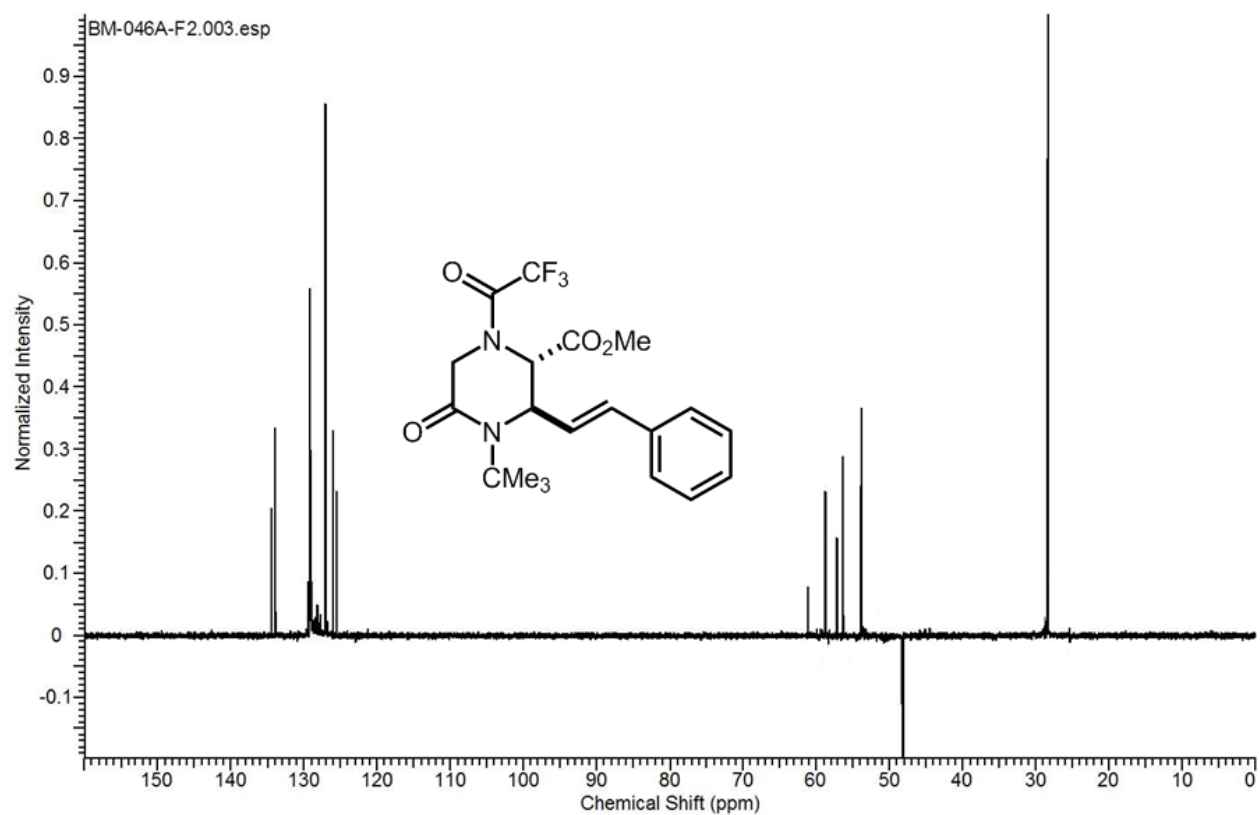

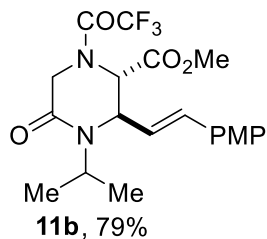

Prepared from 1,3-azadiene **9b** (1016.5 mg, 5.0 mmol) and anhydride **7** (1055.5 mg, 1.0 equiv) using General Procedure B. T = 100 °C, time = 8 h. Purification: Flash chromatography on silica eluting with hexane/EtOAc (50:50). Yield = 1.63 g, 79%, 95:5 dr.  $^1\text{H}$  NMR (400 MHz, Chloroform-*d*, rotamers)  $\delta$  7.33 – 7.22 (m, 2H), 6.94 – 6.80 (m, 2H), 6.53 (td,  $J$  = 15.8, 1.3 Hz, 1H), 5.96 (ddd,  $J$  = 15.8, 5.9, 1.4 Hz, 1H), 4.83 – 4.68 (m, 2H), 4.43 – 4.20 (m, 2H), 3.92 – 3.73 (m, 9H), 1.15 (dd,  $J$  = 6.8 Hz, 6H).  $^{13}\text{C}$  NMR (101 MHz,  $\text{CDCl}_3$ )  $\delta$  167.8, 167.7, 163.2, 162.5, 160.2, 160.1, 157.1, 156.7, 133.5, 133.0, 128.0, 128.0, 123.1, 122.8, 114.3, 114.2, 60.4, 60.4, 57.8, 55.3, 55.0, 54.2, 53.6, 53.4, 47.0, 46.9, 46.5, 46.1, 20.1, 19.9, 19.8, 19.79. **HRMS-EI<sup>+</sup>** ( $m/z$ ): calc'd for  $\text{C}_{20}\text{H}_{23}\text{F}_3\text{N}_2\text{O}_5$  428.1559; found 428.1554.

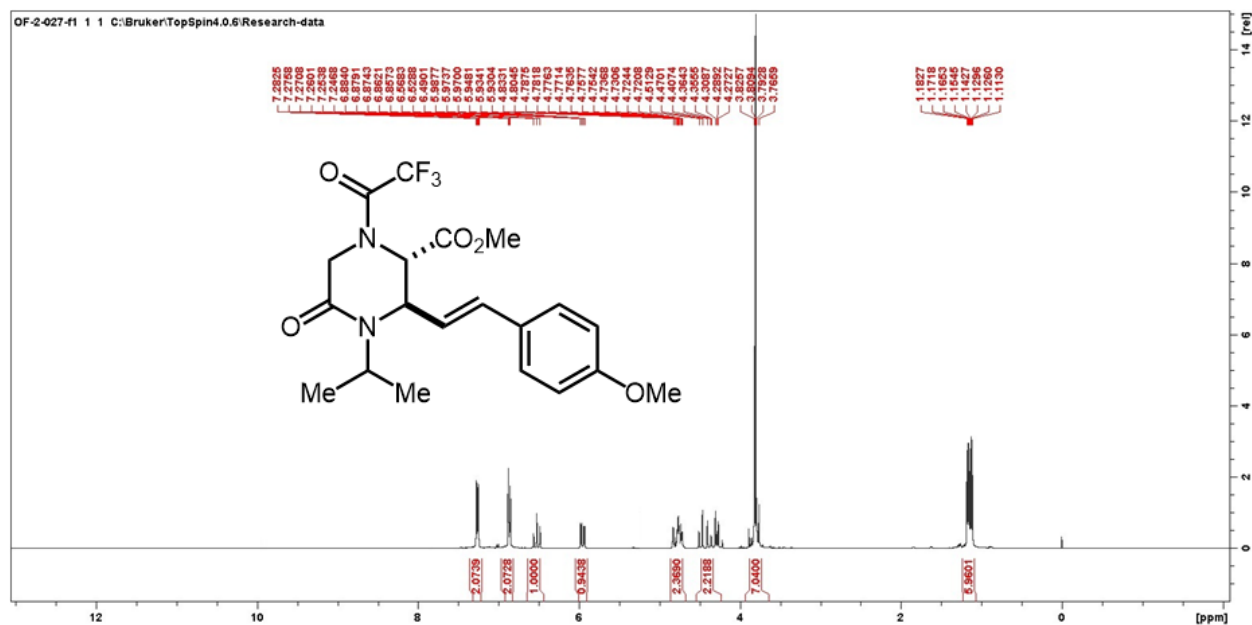

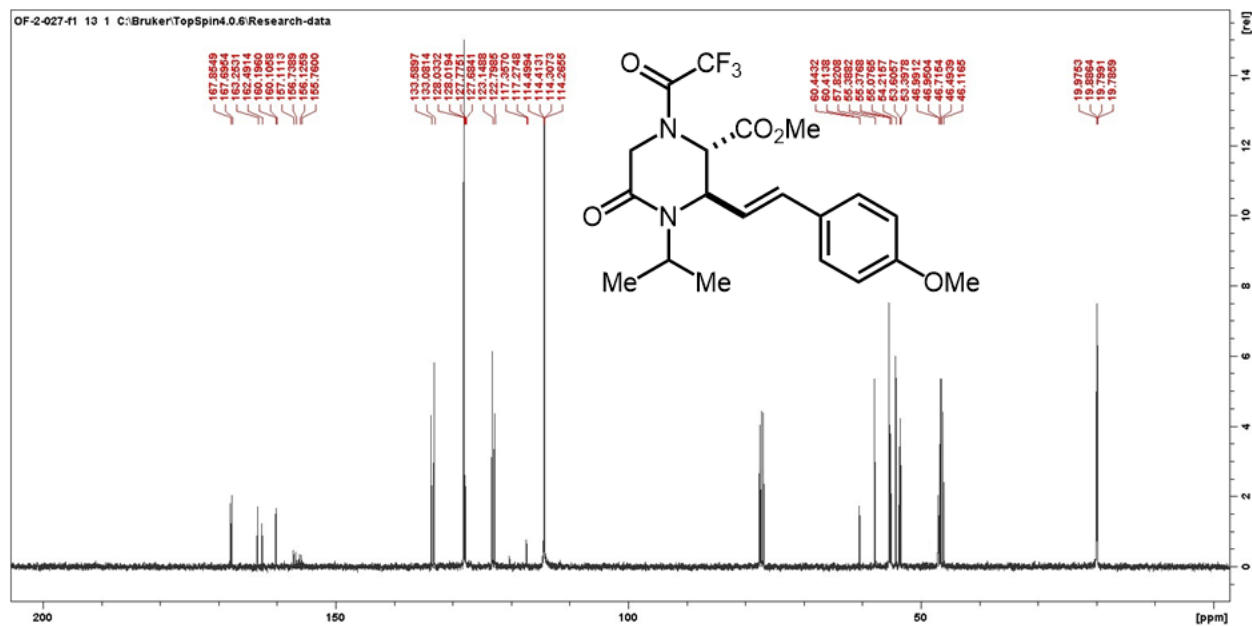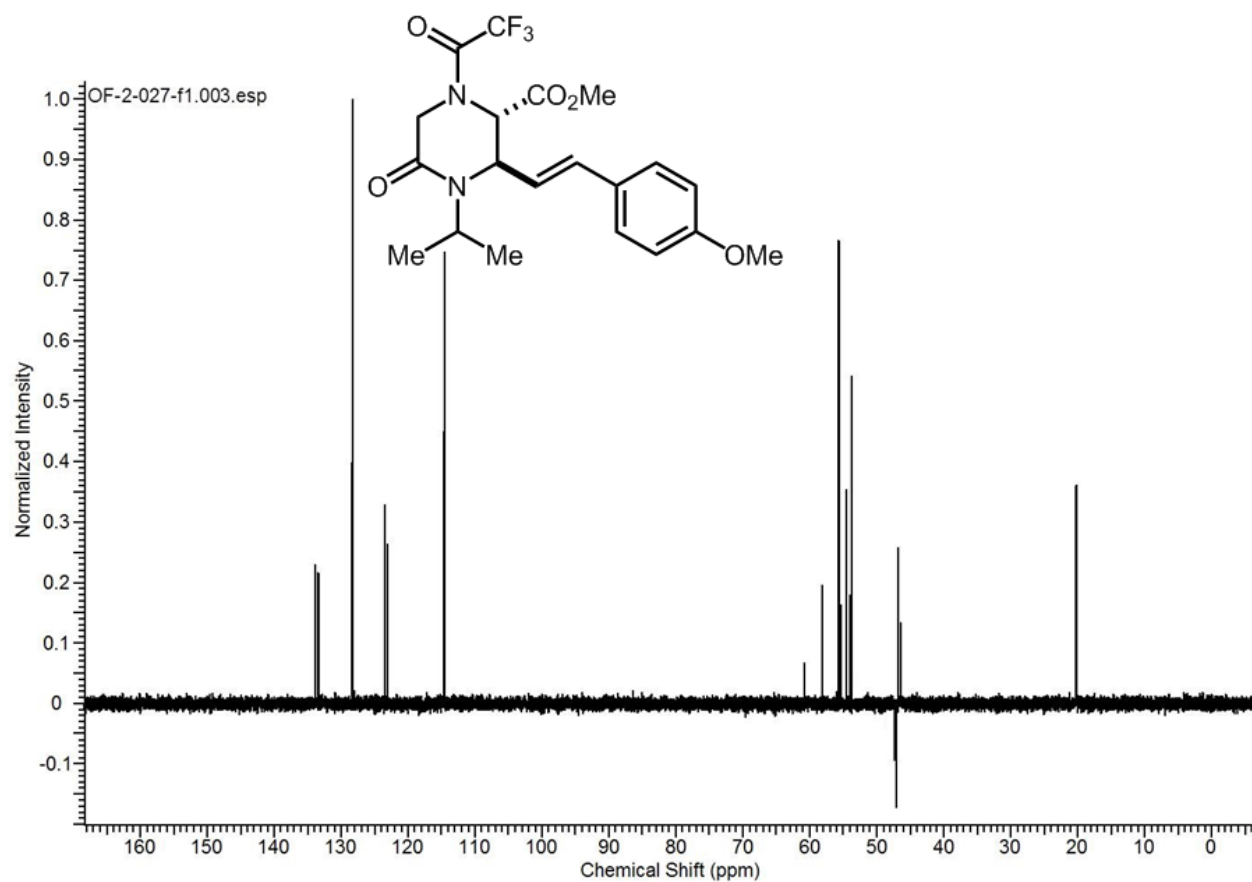

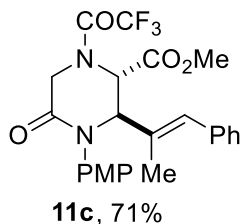

Prepared from 1,3-azadiene **9c** (251 mg, 1.0 mmol) and anhydride **7** (211.1 mg, 1.0 equiv) using General Procedure B. Purification: Flash chromatography on silica eluting with hexane/EtOAc (25:75). Yield = 338.1 mg, 71%, 95:5 dr.  $^1\text{H}$  NMR (400 MHz, Chloroform-*d*, rotamers)  $\delta$  7.29 – 7.05 (m, 7H), 6.87 – 6.72 (m, 2H), 6.46 (s, 1H), 4.74 (dt,  $J = 15.5, 1.7$  Hz, 1H), 4.55 – 4.36 (m, 2H), 4.22 – 4.12 (m, 1H), 3.74 – 3.60 (m, 6H), 1.77 (s, 3H).  $^{13}\text{C}$  NMR (101 MHz,  $\text{CDCl}_3$ )  $\delta$  168.2, 168.0, 163.8, 163.0, 159.0, 157.6, 156.9, 156.5, 135.9, 133.3, 132.4, 129.0, 128.9, 128.5, 128.4, 127.6, 127.5, 127.3, 127.2, 120.3, 117.5, 114., 114.77, 114.6, 114.6, 68.1, 67.3, 58.1, 58.1, 55.5, 54.0, 53.7, 52.6, 49.2, 48.9, 47.0, 46.9, 16.3, 16.2. **HRMS-EI<sup>+</sup>** ( $m/z$ ): calc'd for  $\text{C}_{24}\text{H}_{23}\text{F}_3\text{N}_2\text{O}_5$  476.1559; found 476.1566.

File :C:\GCMS\Beng Research\Data\TKB-11-022A-EST.D  
 Operator : Beng  
 Acquired : 31 Oct 2018 18:40 using AcqMethod 150-250\_NEW.M  
 Instrument : Instrument #1  
 Sample Name :  
 Misc Info :  
 Vial Number: 1

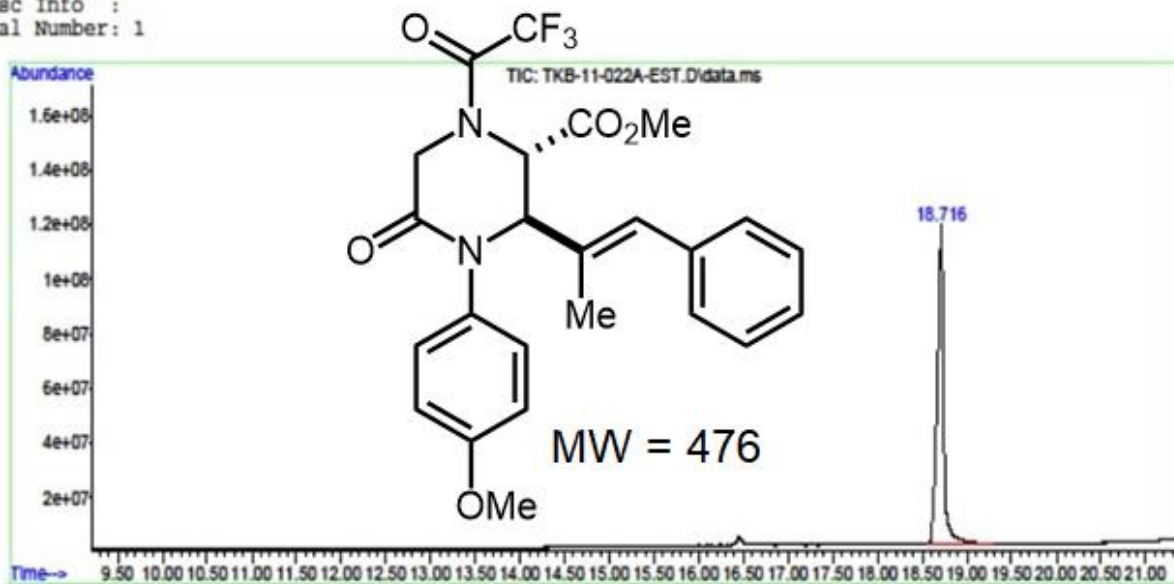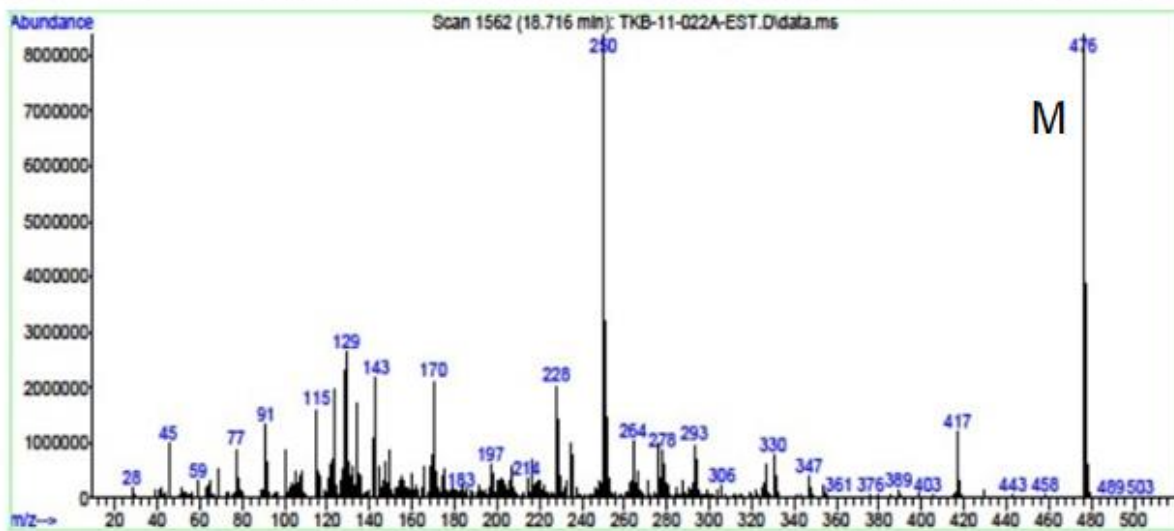

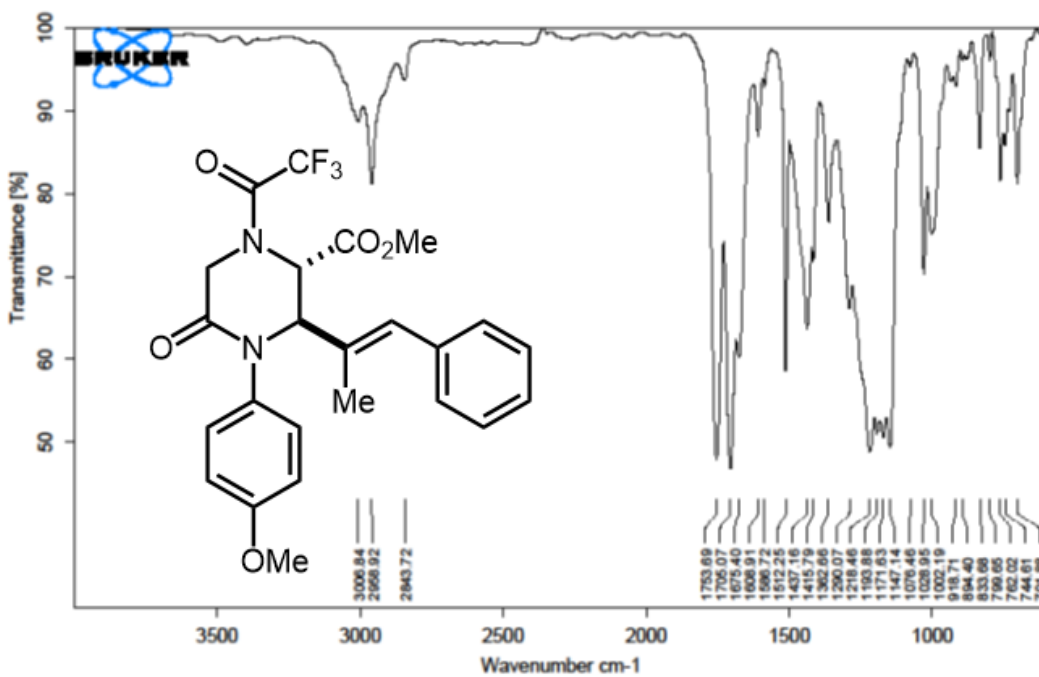

C:\Users\Public\Documents\Bruker\OPUS\_7.5.18\DATA\MEAS\TKB-11-022A-est-f1.0 TKB-11-022A-est-f1 Instrument type and / or accor 10/14/2018

Page 1/1

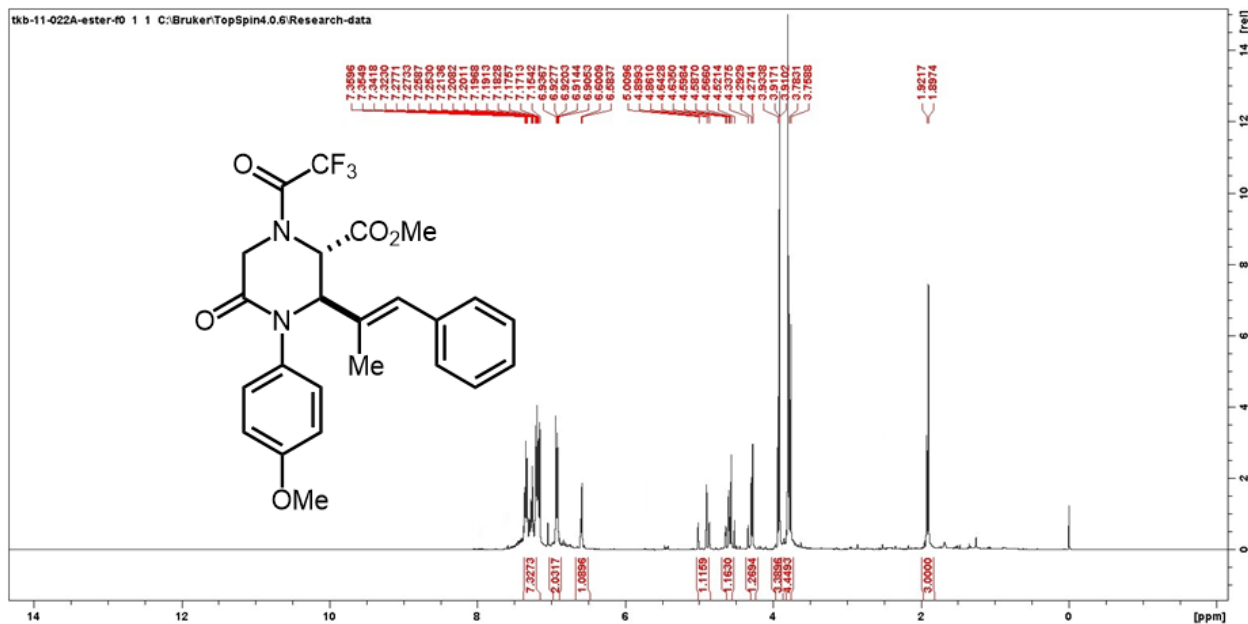

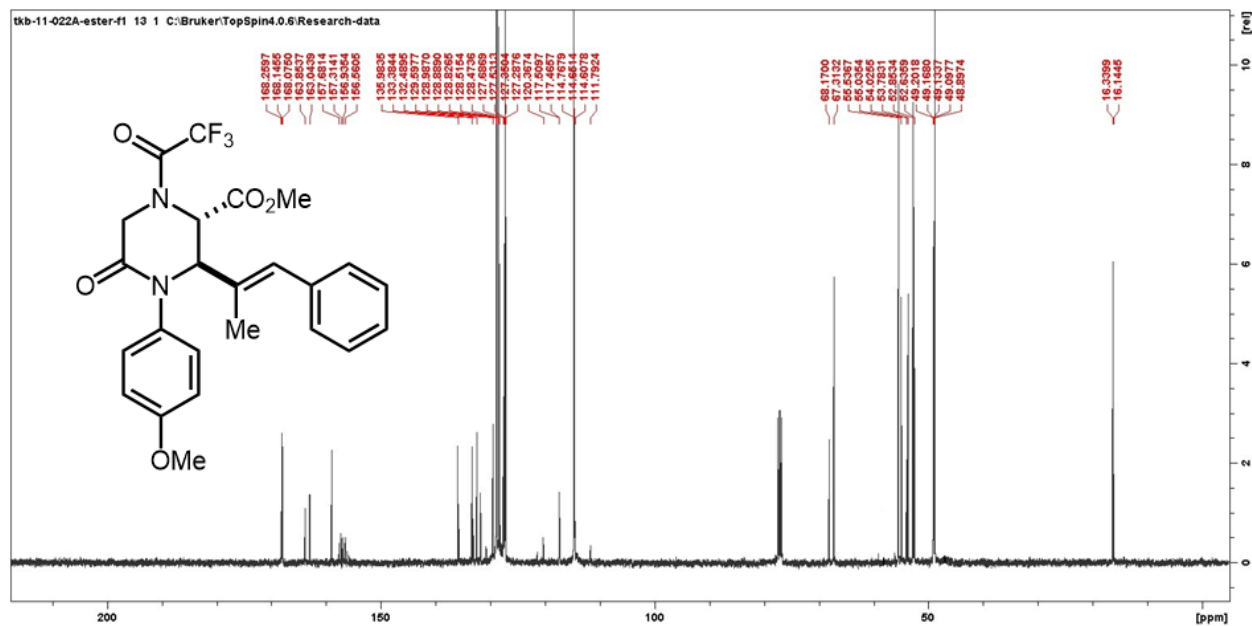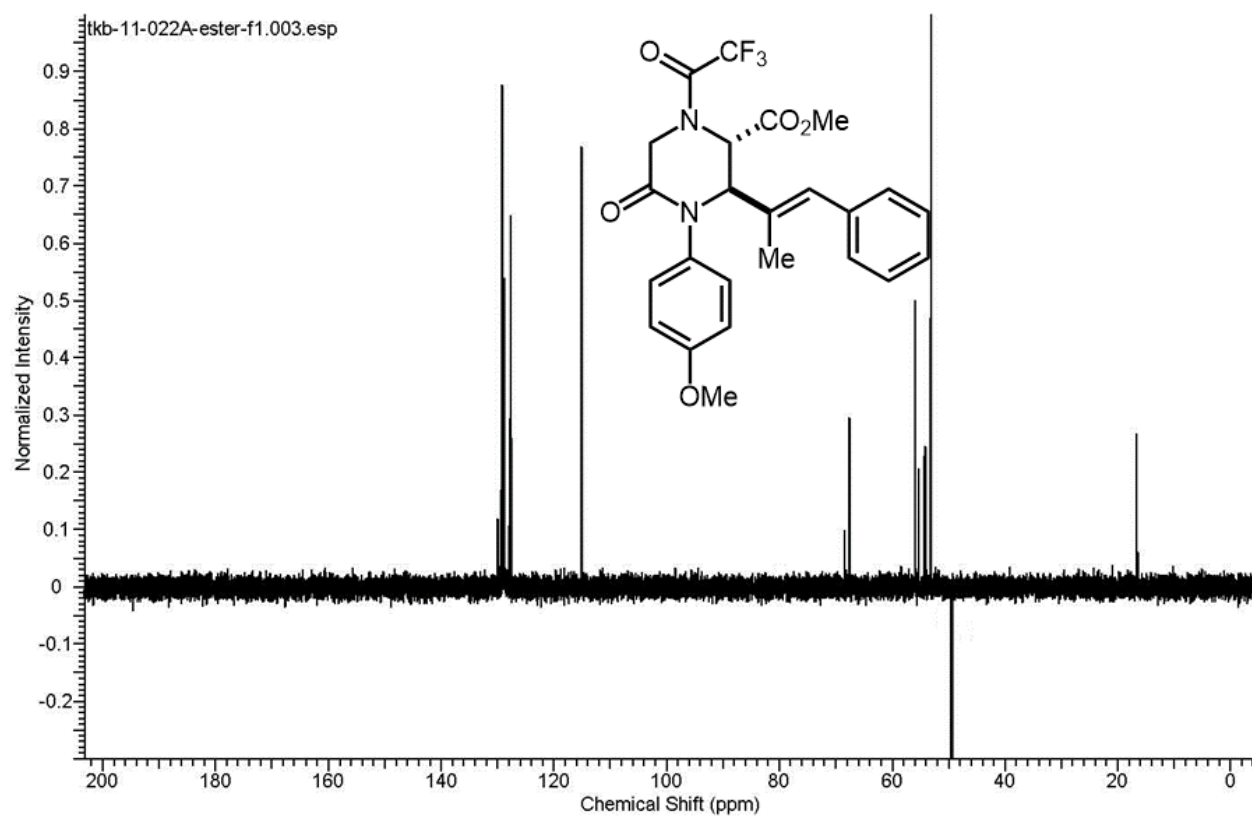

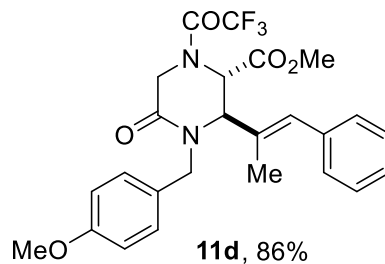

Prepared from 1,3-azadiene **9d** (1.0 mmol) and anhydride **7** (211.1 mg, 1.0 equiv) using General Procedure B. Purification: Flash chromatography on silica eluting with hexane/EtOAc (50:50). Yield = 421.8 mg, 86%, 95:5 dr. **HRMS-EI<sup>+</sup>** (*m/z*): calc'd for C<sub>25</sub>H<sub>25</sub>F<sub>3</sub>N<sub>2</sub>O<sub>5</sub> 490.1716; found 490.1722.

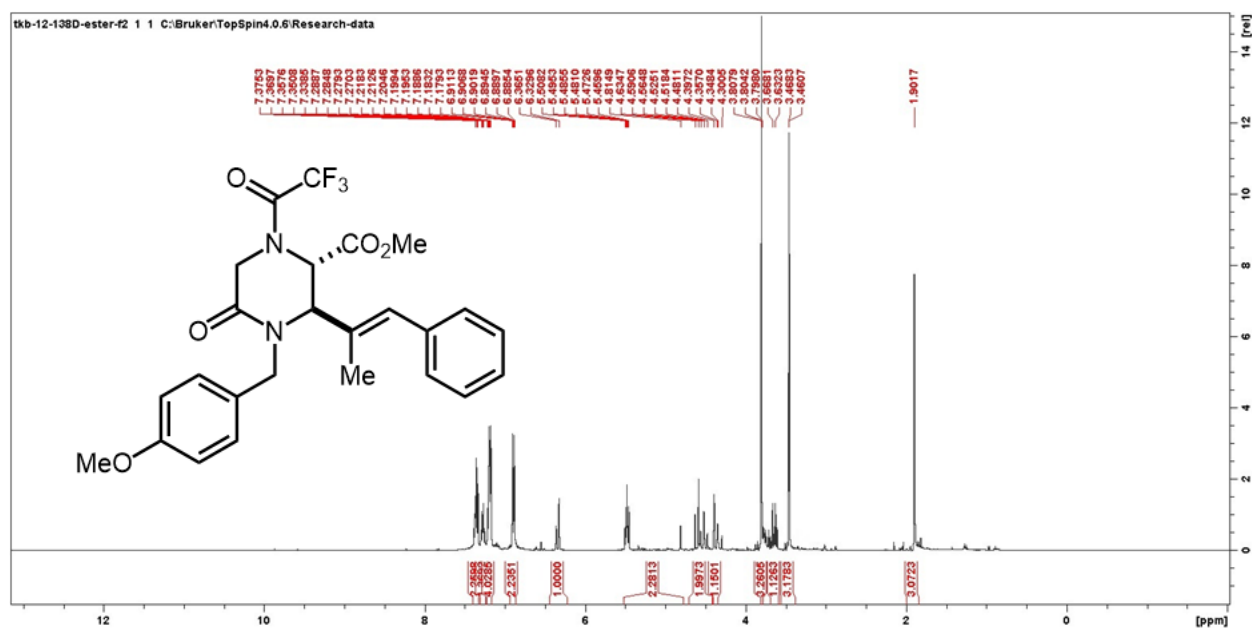





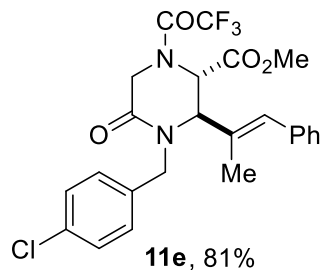

Prepared from 1,3-azadiene **9e** (0.5 mmol) and anhydride **7** (105.6 mg, 1.0 equiv) using General Procedure B. Purification: Flash chromatography on silica eluting with hexane/EtOAc (50:50). Yield = 200.4 mg, 81%, 95:5 dr. **HRMS-EI<sup>+</sup>** ( $m/z$ ): calc'd for C<sub>24</sub>H<sub>22</sub>ClF<sub>3</sub>N<sub>2</sub>O<sub>4</sub> 494.1220; found 494.1225.

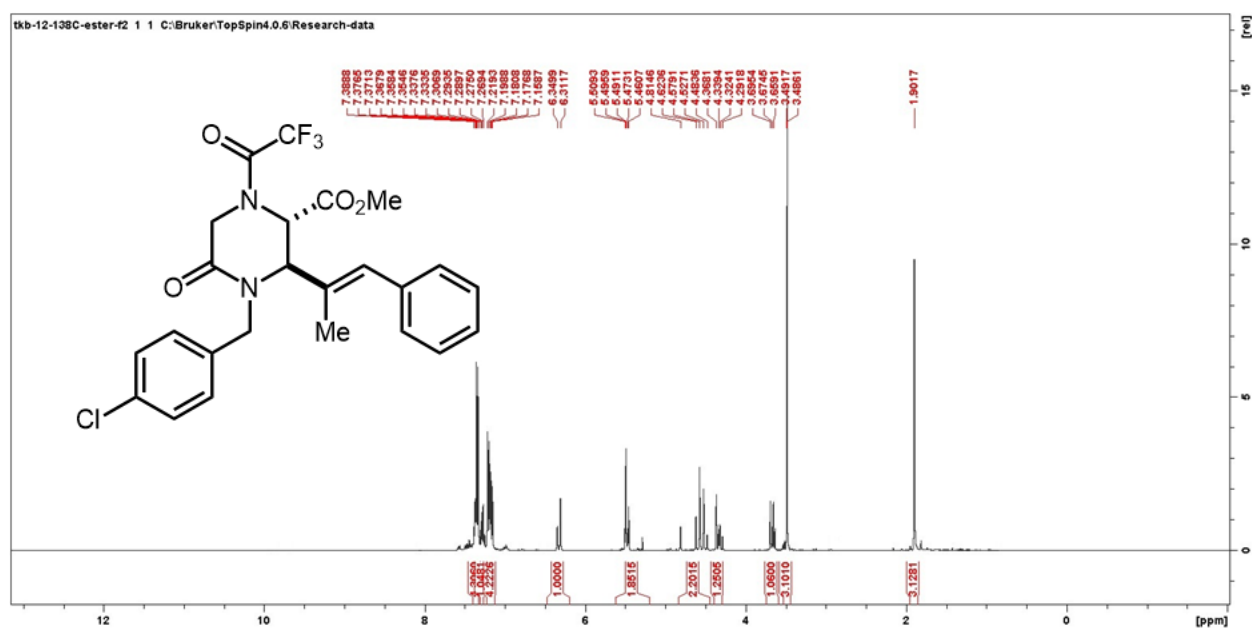

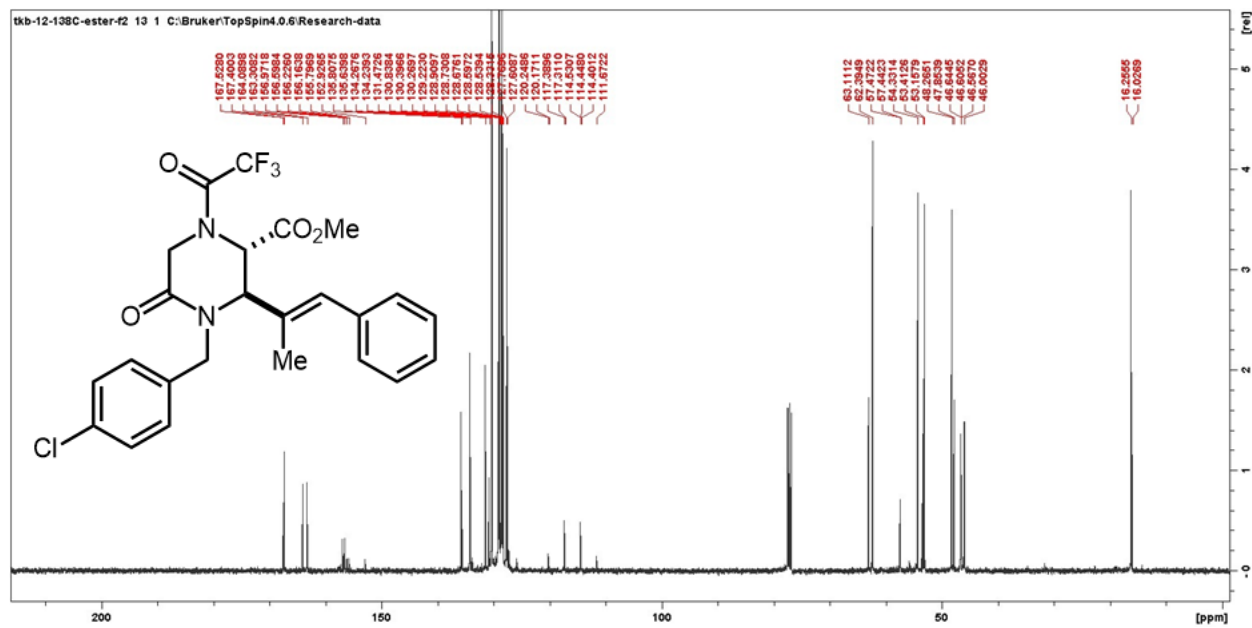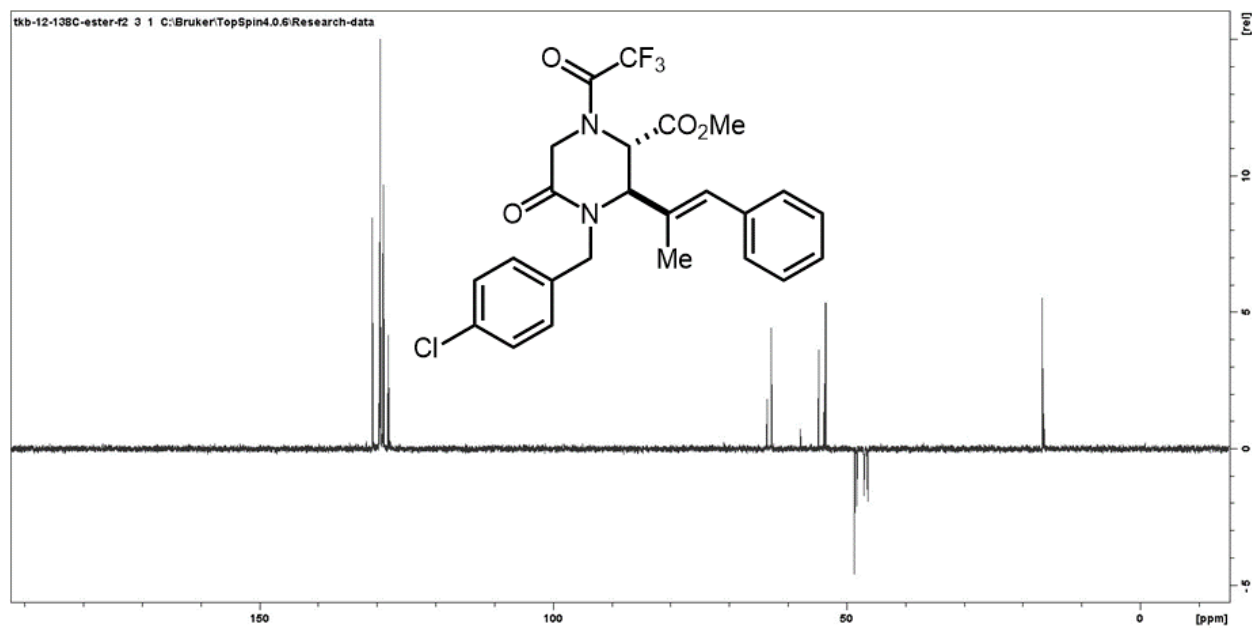

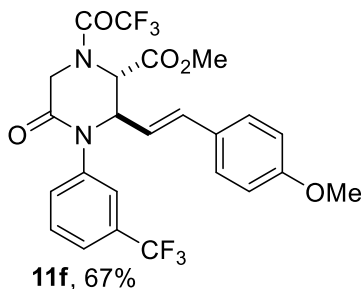

Prepared from 1,3-azadiene **9f** (305.3 mg, 1.0 mmol) and anhydride **7** (211.1 mg, 1.0 equiv) using General Procedure B. Purification: Flash chromatography on silica eluting with hexane/EtOAc (75:25). Yield = 355.2 mg, 67%, 95:5 dr.  $^1\text{H}$  NMR (400 MHz, Chloroform-*d*, rotamers)  $\delta$  7.38 – 7.24 (m, 4H), 7.21 – 7.16 (d,  $J = 8.7$ , 2H), 6.73 (d,  $J = 8.7$ , 2H), 6.41 (dd,  $J = 15.8, 9.8$  Hz, 1H), 5.87 (td,  $J = 16.3, 6.3$  Hz, 1H), 4.98 – 4.77 (m, 1H), 4.54 – 4.40 (m, 2H), 3.76 (s, 3H), 3.74 – 3.58 (m, 4H).  $^{13}\text{C}$  NMR (101 MHz,  $\text{CDCl}_3$ )  $\delta$  167.7, 167.6, 163.3, 162.6, 160.5, 160.4, 157.2, 156.8, 156.0, 140.7, 140.6, 135.0, 134.4, 130.2, 129.8, 128.2, 127.4, 127.3, 124.8, 123.1, 123.1, 120.4, 120.1, 114.8, 114.4, 63.3, 62.5, 60.0, 57.1, 55.4, 54.0, 53.8, 47.1, 46.6. **HRMS-EI<sup>+</sup>** ( $m/z$ ): calc'd for  $\text{C}_{24}\text{H}_{20}\text{F}_6\text{N}_2\text{O}_5$  530.1276; found 530.1268.

File :C:\GCMS\Beng Research\Data\TKB-11-036B-F2.D  
 Operator : Beng  
 Acquired : 27 Oct 2018 15:12 using AcqMethod 150-250\_NEW.M  
 Instrument : Instrument #1  
 Sample Name:  
 Misc Info :  
 Vial Number: 1

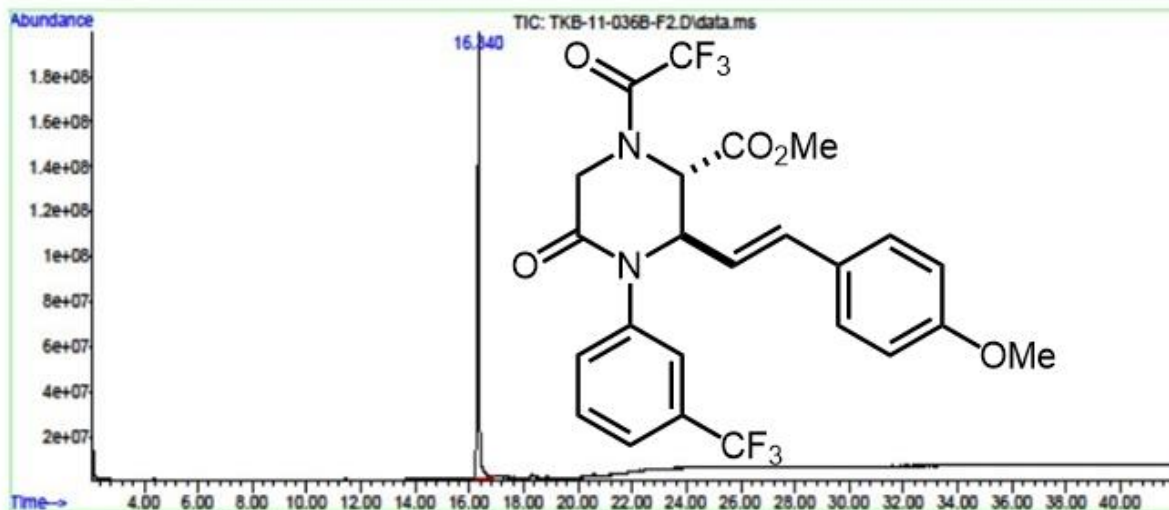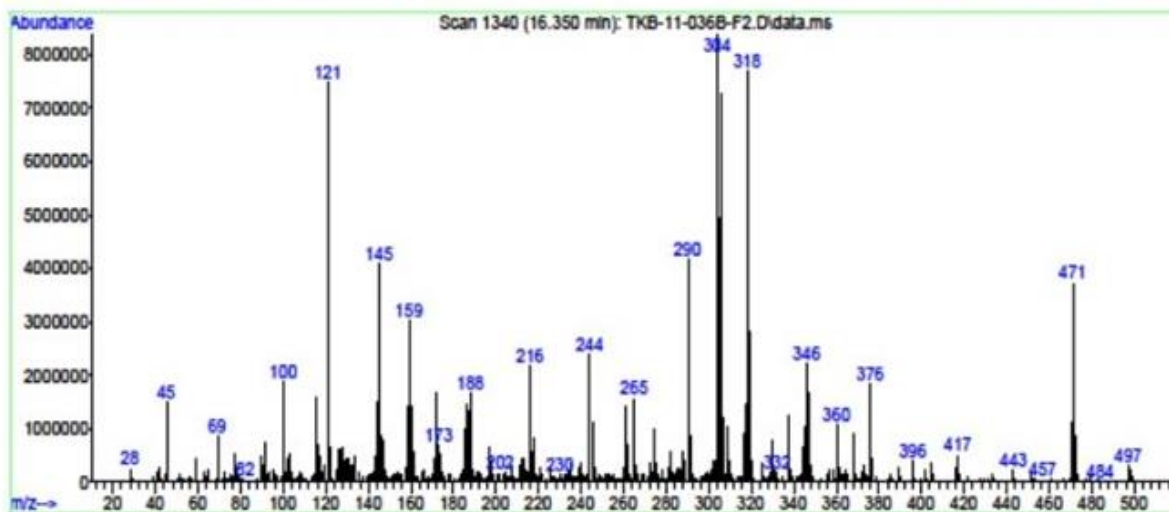

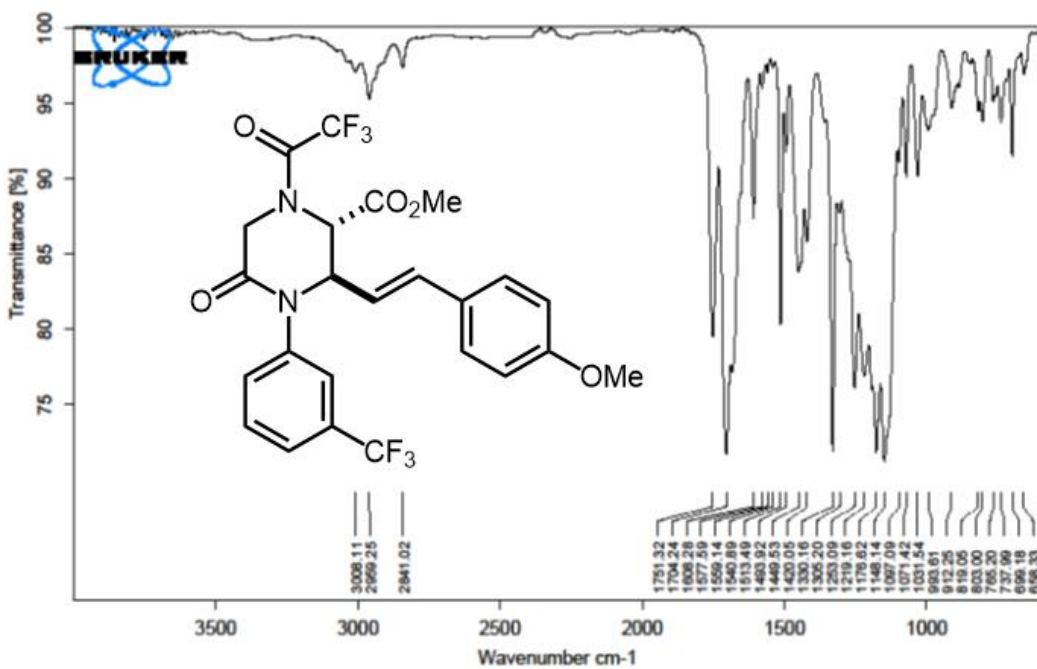

C:\Users\Public\Documents\Bruker\OPUS\_7.5\18\DATA\MEAS\TKB-11-036B-F3.0 TKB-11-036B-F3 Instrument type and / or accessory 10/14/2018

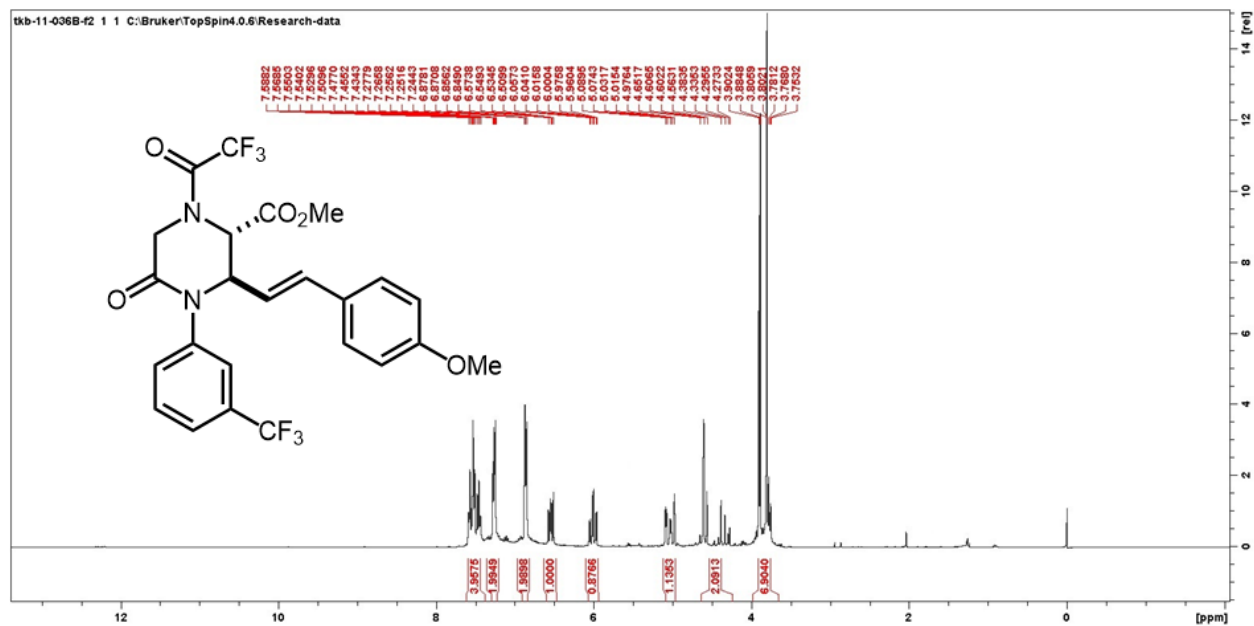

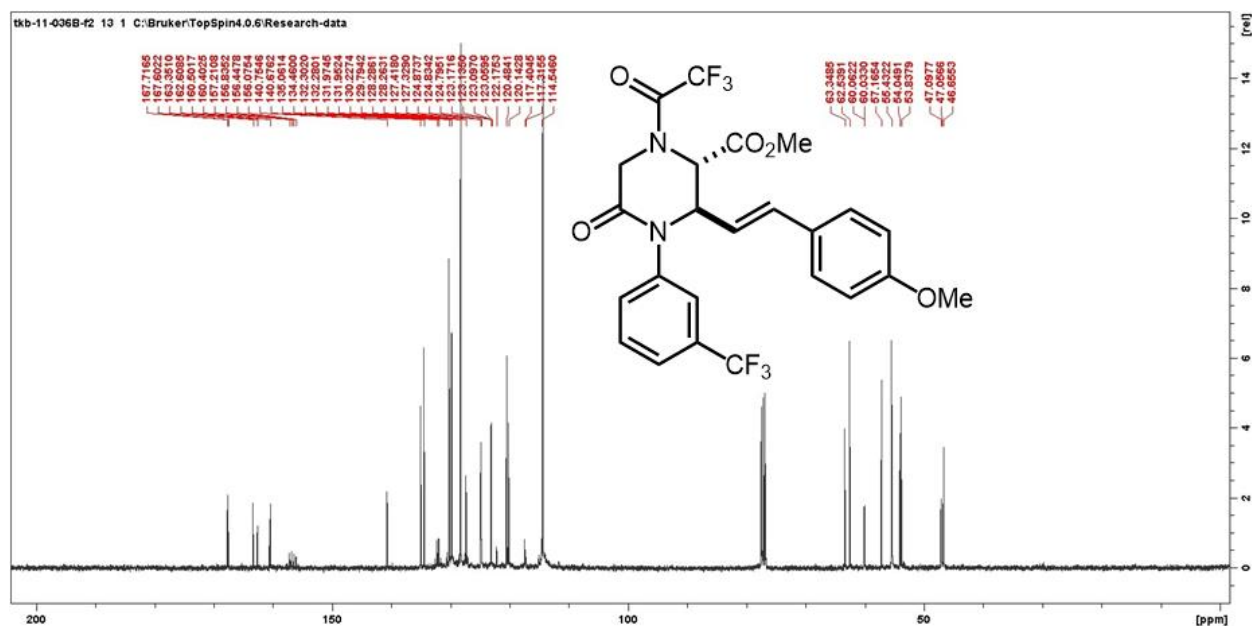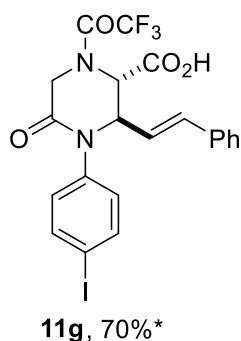

Prepared from 1,3-azadiene **9g** (0.5 mmol) and anhydride **7** (105.6 mg, 1.0 equiv) using General Procedure B but without performing the methylation. Purification: Flash chromatography on silica eluting with hexane/EtOAc (20:80). Yield = 190.5 mg, 70%, 95:5 dr.  $^1\text{H}$  NMR (400 MHz,  $\text{CDCl}_3$ , mixture of rotamers)  $\delta$  9.81 (br. s, 1H), 7.67 (t,  $J = 8.4$  Hz, 2H), 7.30 – 7.24 (m, 6H), 6.95 (dd,  $J = 11.2, 8.3$  Hz, 2H), 6.58 (dd,  $J = 15.7, 5.4$  Hz, 2H), 6.15 (dd,  $J = 15.7, 6.5$  Hz, 2H), 5.43 – 4.93 (m, 2H), 4.63 – 4.32 (m, 2H).  $^{13}\text{C}$  NMR (101 MHz,  $\text{CDCl}_3$ , mixture of rotamers)  $\delta$  169.21, 169.11, 164.50, 163.47, 157.21, 156.83, 156.66, 156.29, 139.61, 139.47, 138.86, 135.38, 134.89, 134.82, 129.17, 129.11, 129.06, 129.00, 128.96, 128.48, 128.39, 128.35, 126.95, 123.04, 122.70, 120.30, 117.44, 117.33, 114.58, 114.47, 93.75, 93.72, 63.49, 62.57, 59.84, 56.86, 47.01, 46.62. **HRMS- $\text{EI}^+$**  ( $m/z$ ): calc'd for  $\text{C}_{21}\text{H}_{16}\text{F}_3\text{IN}_2\text{O}_4$  544.0107; found 544.0113.

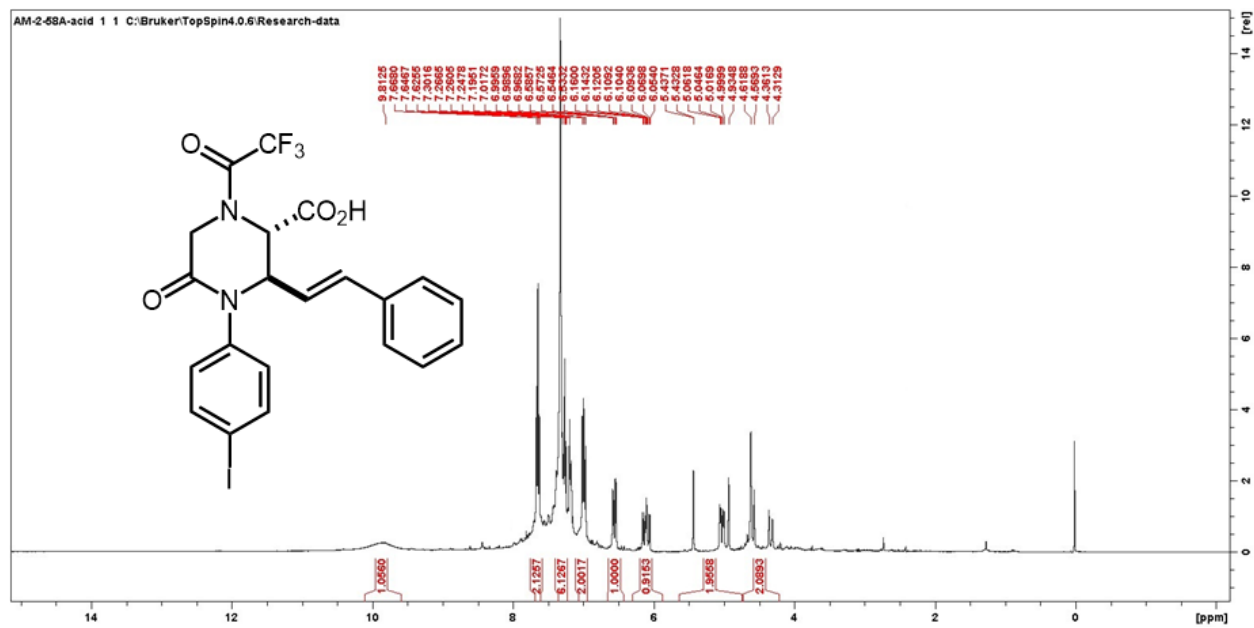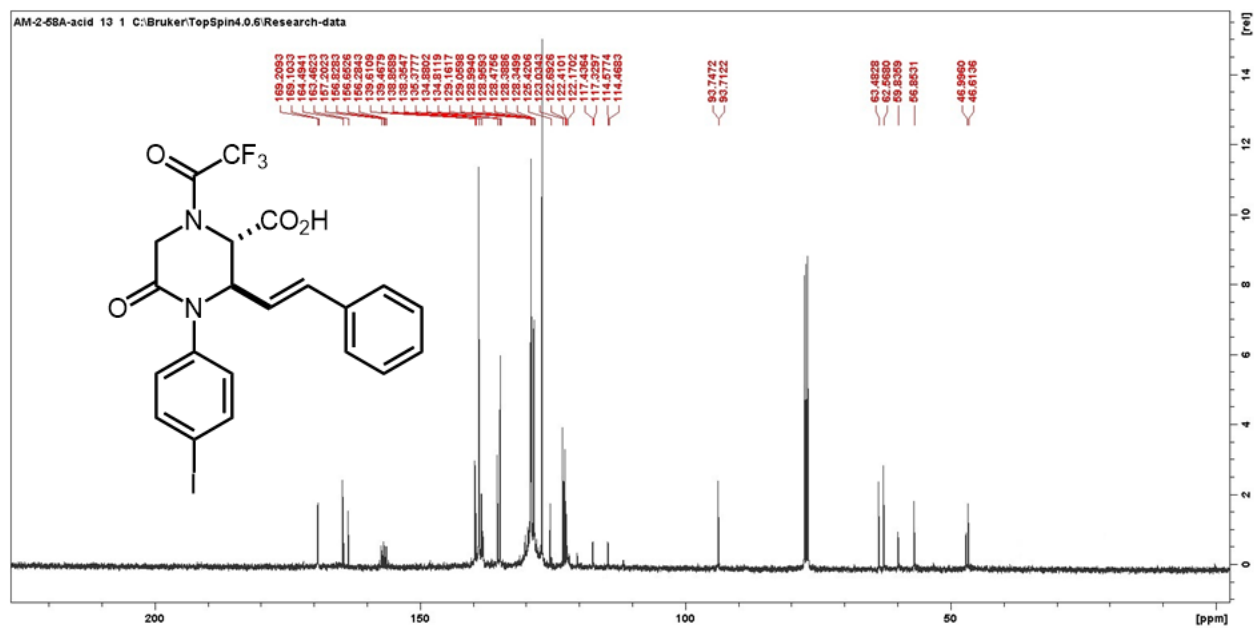



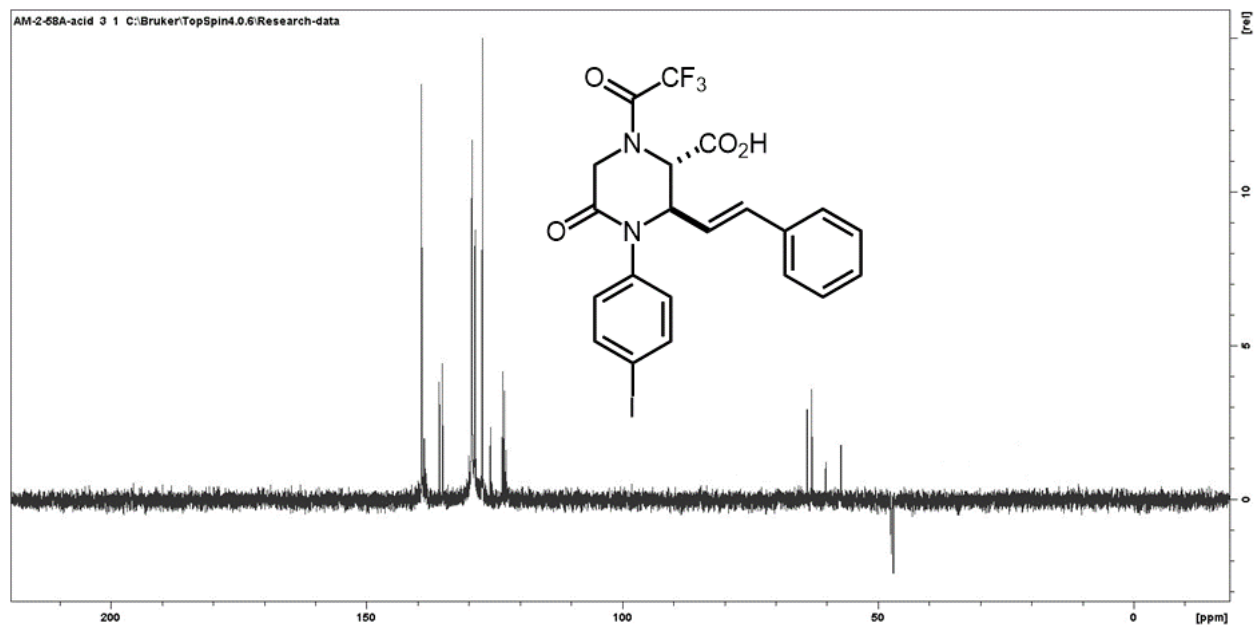

## Synthetic Applications

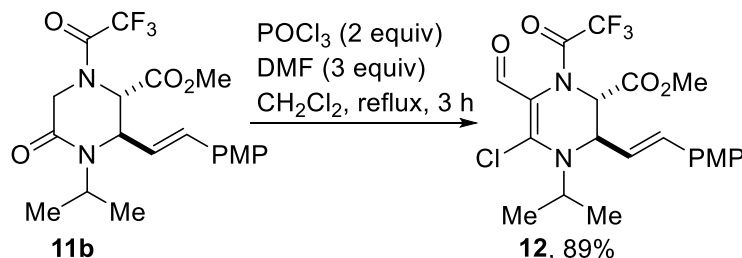

Prepared from **11b** (214.2 mg, 0.50 mmol) using General Procedure C. Purification: Flash chromatography on silica (pretreated with 1% Et<sub>3</sub>N) eluting with hexane/EtOAc (80:20). Yield = 211.3 mg, 89%, 95:5 dr. <sup>1</sup>H NMR (400 MHz, Chloroform-*d*, mixture of rotamers) δ 9.81 (s, 1H), 7.30 (d, 2H), 6.85 (d, 2H), 6.35 (d, *J* = 15.4 Hz, 1H), 5.97 & 5.84 (dd, *J* = 15.8, 6.6 Hz, 1H), 4.95 & 4.87 (ddd, *J* = 7.0, 2.9, 1.1 Hz, 2H), 4.84 – 4.70 (m, 1H), 3.82 (dd, *J* = 2.9, 1.1 Hz, 1H), 3.80 – 3.66 (m, 6H), 1.31 – 1.17 (m, 6H). <sup>13</sup>C NMR (101 MHz, CDCl<sub>3</sub>) δ 185.3, 184.8, 169.3, 167.8, 159.8, 159.7, 142.3, 141.8, 133.2, 132.0, 128.2, 128.0, 124.1, 120.1, 114.1, 114.0, 104.8, 102.3, 56.9, 56.5, 55.3, 53.1, 53.0, 52.7, 52.5, 47.9, 44.5, 22.2, 21.2, 20.6, 19.5. HRMS-EI<sup>+</sup> (*m/z*): calc'd for C<sub>21</sub>H<sub>22</sub>ClF<sub>3</sub>N<sub>2</sub>O<sub>5</sub> 474.1169; found 474.1173.

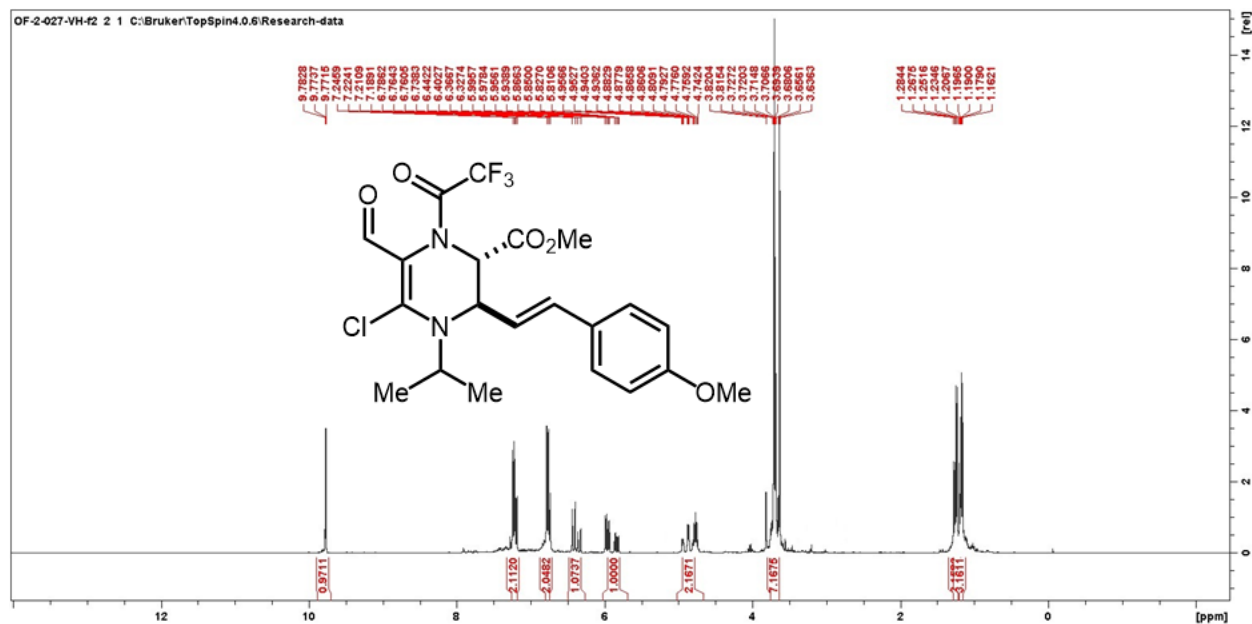

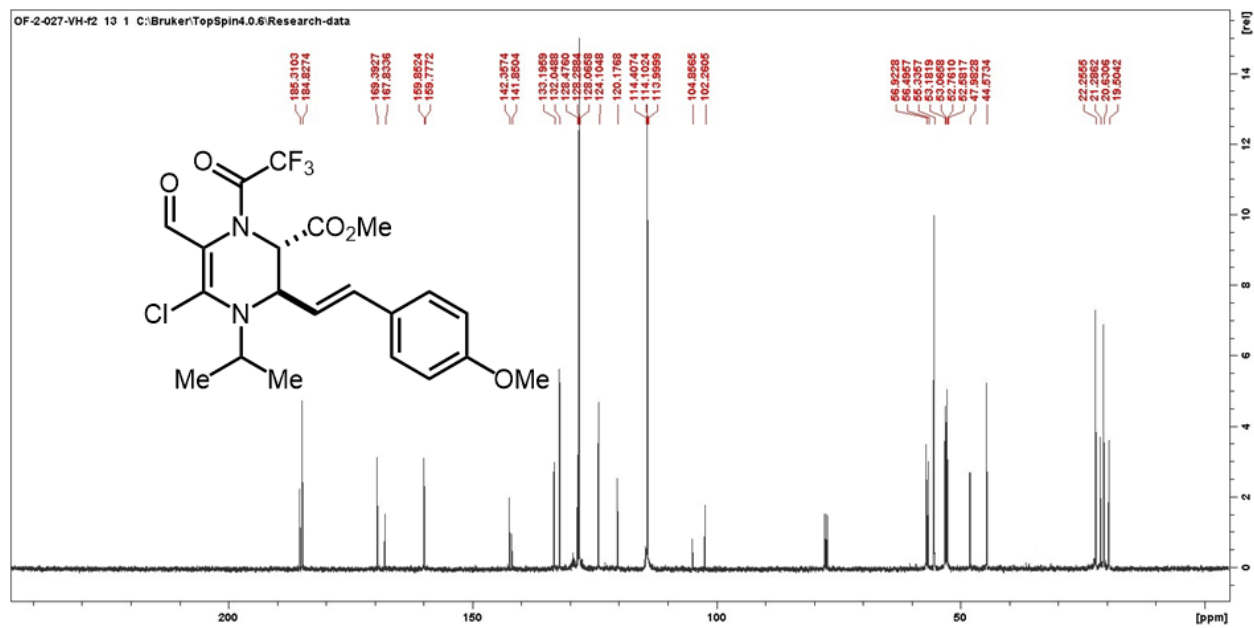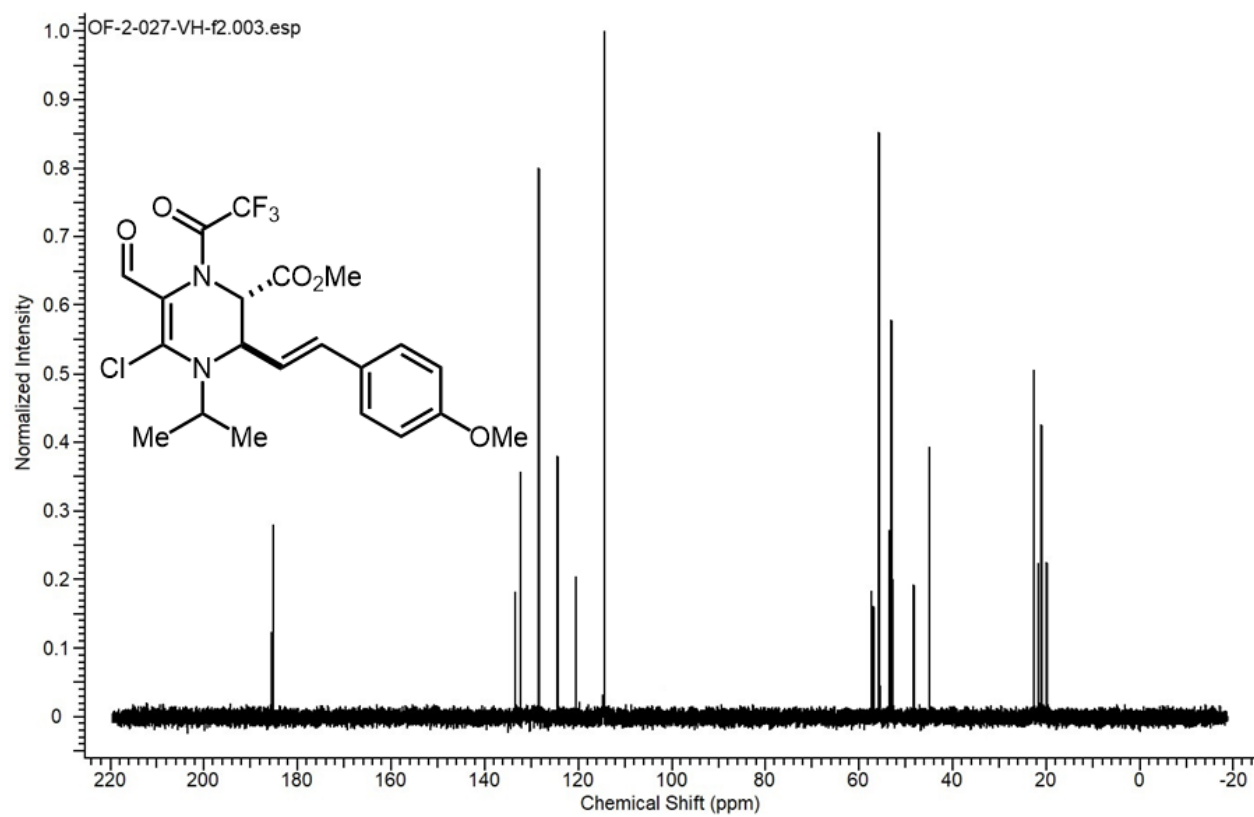

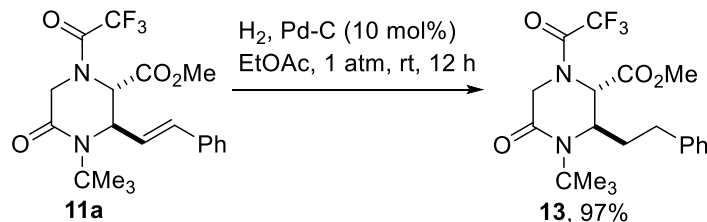

Prepared from **11a** (206.2 mg, 0.50 mmol) using General Procedure D. Yield = 201.3 mg, 97%, 95:5 dr.  $^1\text{H NMR}$  (400 MHz, Chloroform-*d*, rotamers)  $\delta$  7.22 – 6.95 (m, 5H), 5.18 + 4.74 (dd,  $J = 2.9, 1.4$  Hz, 1H), 4.18 – 4.02 (m, 3H), 3.63 (s, 3H), 2.58 (ddt,  $J = 18.7, 8.8, 4.0$  Hz, 1H), 2.47 – 2.32 (m, 1H), 1.88 – 1.62 (m, 2H), 1.19 (s, 9H).  $^{13}\text{C NMR}$  (101 MHz,  $\text{CDCl}_3$ )  $\delta$  169.1, 168.6, 163.4, 162.4, 157.1, 156.7, 156.3, 155.9, 139.4, 139.2, 129.0, 128.9, 128.3, 126.9, 126.8, 120.3, 117.5, 117.4, 114.6, 114.5, 58.7, 58.6, 57.6, 57.6, 55.2, 54.4, 53.6, 53.4, 47.6, 47.4, 36.1, 35.7, 32.3, 32.0, 28.3, 28.2. **HRMS-EI<sup>+</sup>** ( $m/z$ ): calc'd for  $\text{C}_{20}\text{H}_{25}\text{F}_3\text{N}_2\text{O}_4$  414.1766; found 414.1769.

File :C:\GCMS\Beng Research\Data\TKB-11-031A-HYD.D  
 Operator : Beng  
 Acquired : 28 Oct 2018 22:13 using AcqMethod 150-250\_NEW.M  
 Instrument : Instrument #1  
 Sample Name:  
 Misc Info :  
 Vial Number: 1

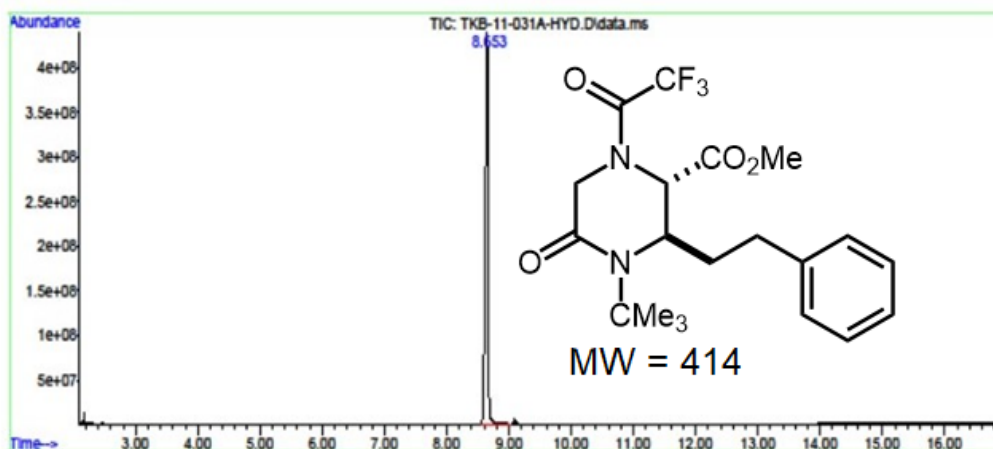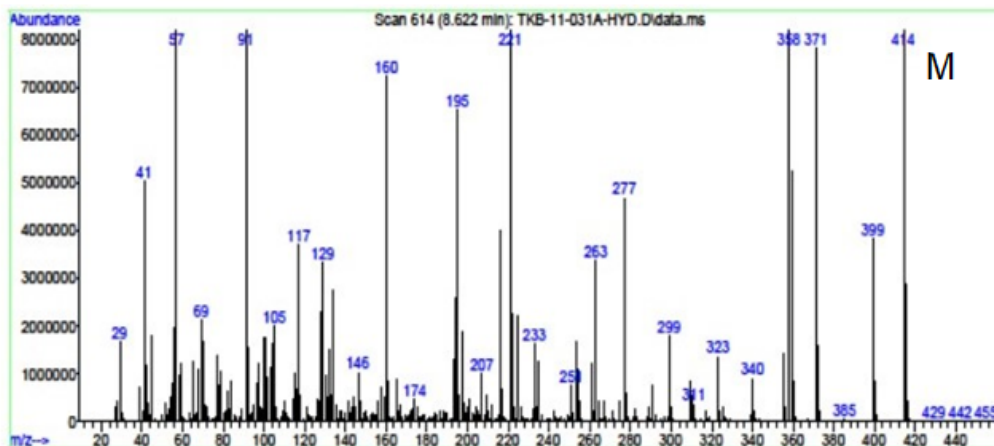

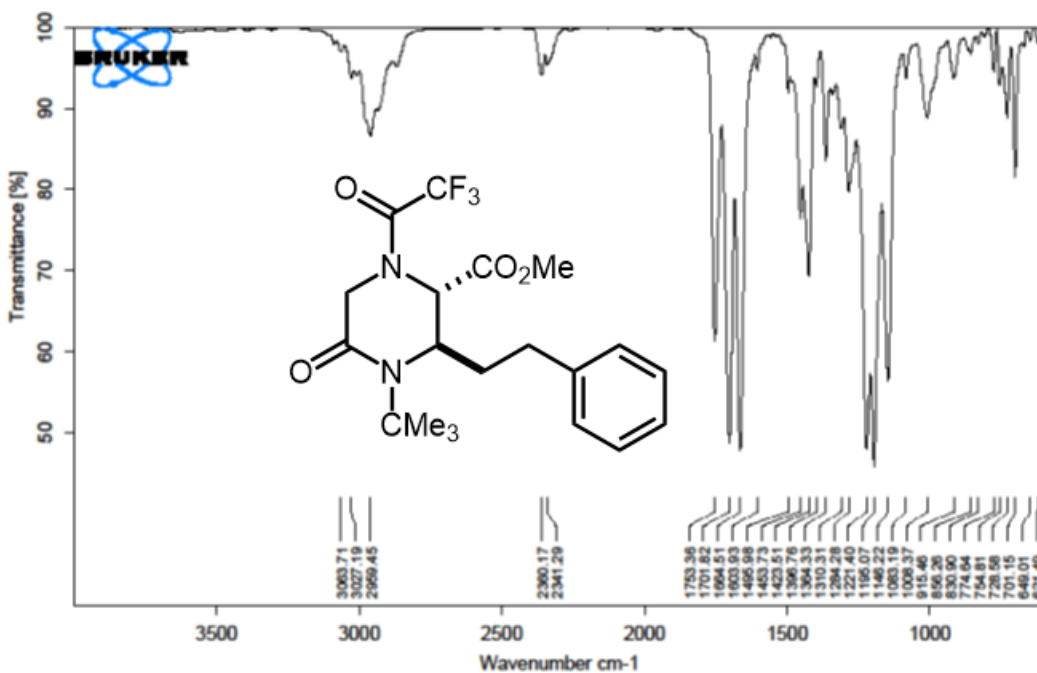

C:\Users\Public\Documents\Bruker\OPUS\_7.5.18\DATA\MEAS\TKB-11-031A-hyd.1 TKB-11-031A-hyd Instrument type and / or accessor 11/10/2018

Page 1/1

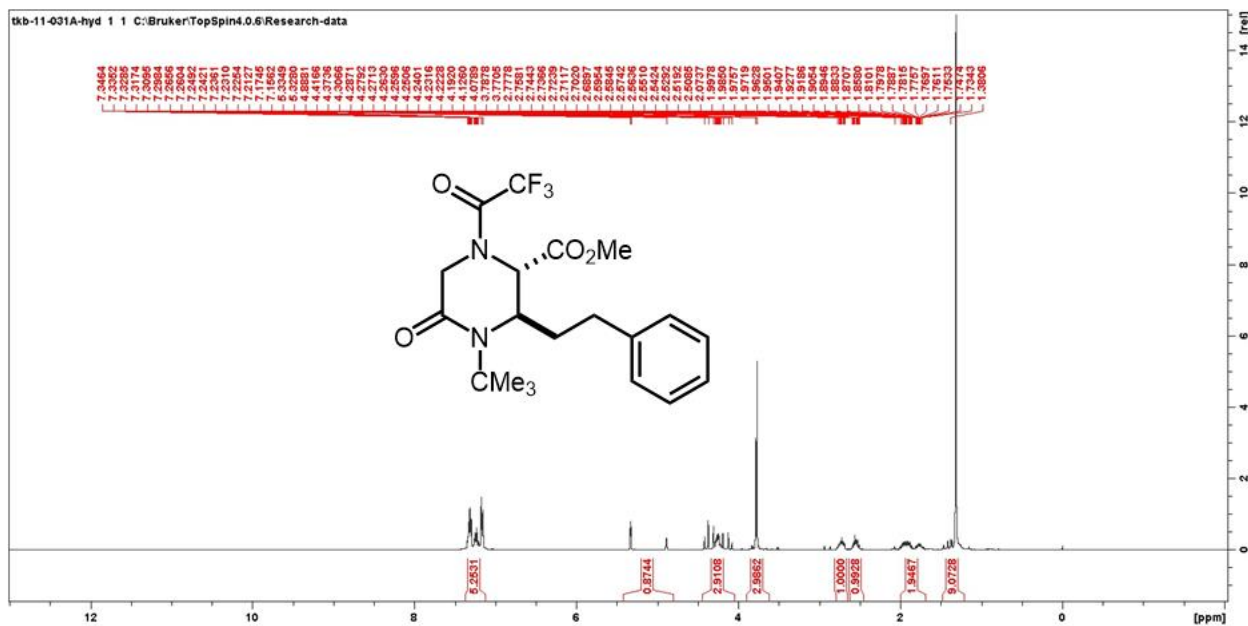

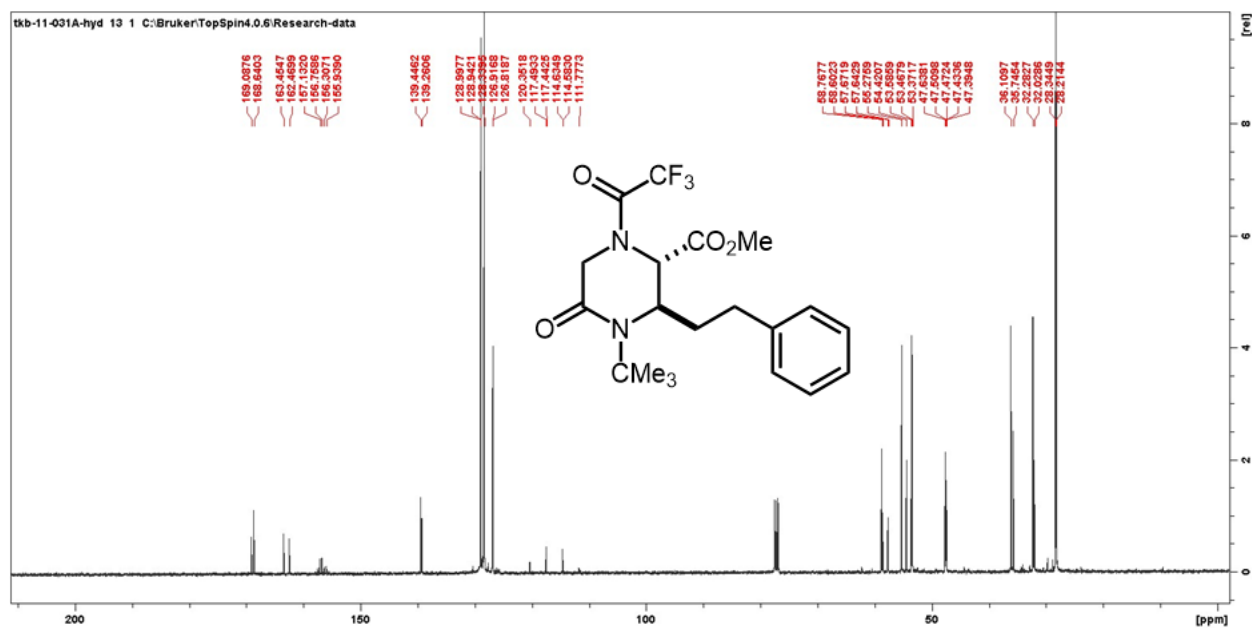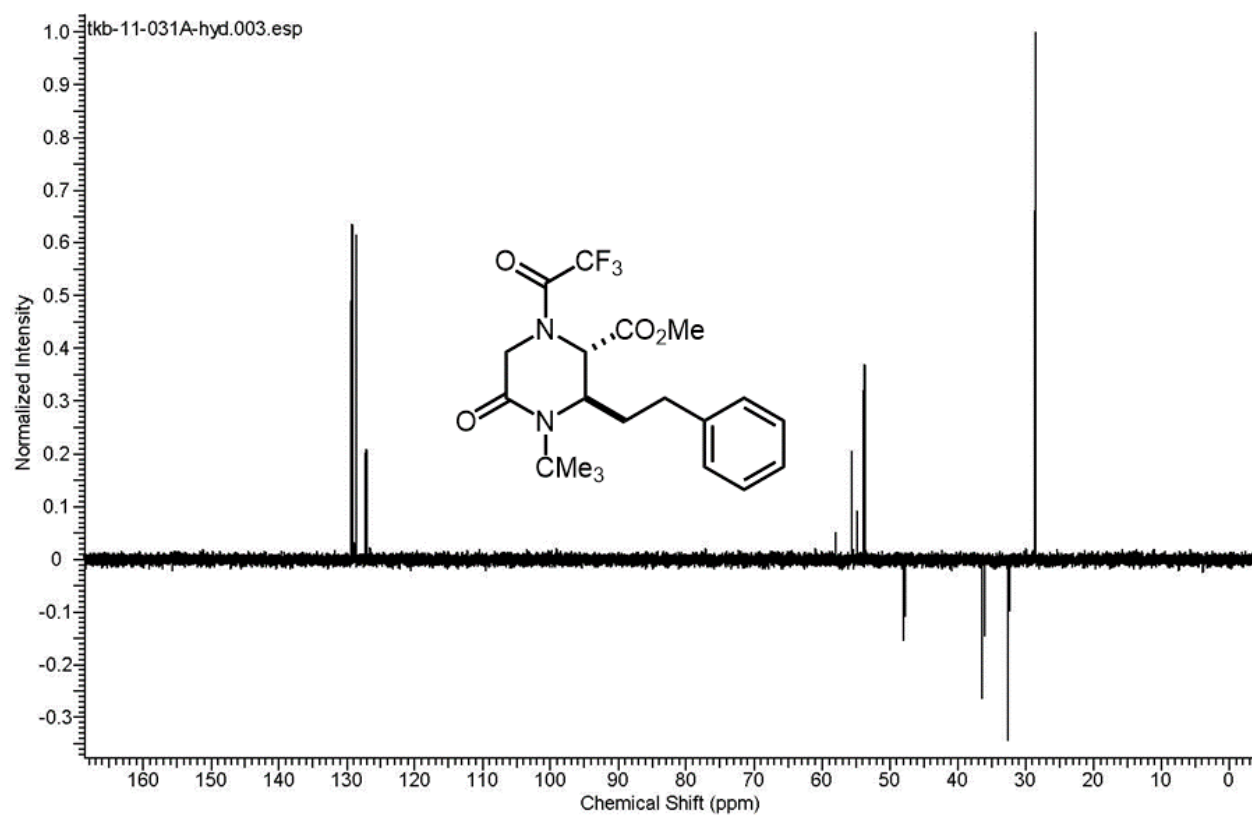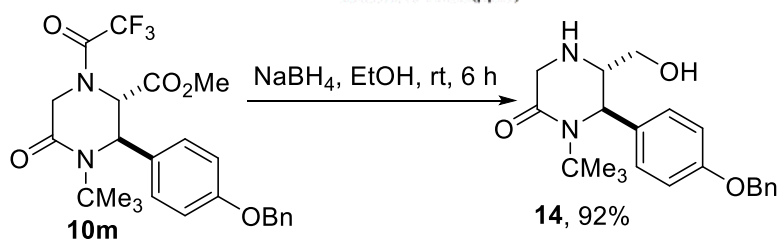

To a 10 mL round-bottomed flask equipped with a magnetic stir bar under a N<sub>2</sub> atmosphere, in a 0 °C ice/water bath, was added ester **10m** (197 mg, 0.40 mmol) and ethanol (5 mL). NaBH<sub>4</sub> (122 mg, 3.2 mmol, 8 equiv) was then added portion-wise. The reaction mixture was allowed to warm to room temperature overnight (judged complete by GC-MS analysis). After this time, the reaction mixture was cooled to 0 °C and diluted with Et<sub>2</sub>O (10 mL), then quenched by slow addition of a solution of 2 N NaOH<sub>(aq)</sub> (2 mL). The organic layer was washed successively with sat NH<sub>4</sub>Cl and brine, then dried over anhydrous Na<sub>2</sub>SO<sub>4</sub>. It was filtered and concentrated *in vacuo* to yield the alcohol as a pale yellow oil. Yield = 136 mg, 92%. <sup>1</sup>H NMR (400 MHz, Chloroform-*d*) δ 7.33 – 7.15 (m, 5H), 7.03 – 6.94 (m, 2H), 6.94 – 6.81 (m, 2H), 4.92 (s, 2H), 4.60 (d, *J* = 2.1 Hz, 1H), 3.71 – 3.46 (m, 3H), 3.36 (s, 2H), 2.83 – 2.71 (m, 1H), 1.26 (q, *J* = 16.4 Hz, 1H), 1.23 (s, 9H). <sup>13</sup>C NMR (101 MHz, CDCl<sub>3</sub>) δ 169.1, 158.4, 136.8, 134.6, 128.7, 128.2, 127.6, 127.3, 115.3, 70.2, 60.8, 60.0, 58.9, 58.0, 46.9, 28.3. HRMS-EI<sup>+</sup> (*m/z*): calc'd for C<sub>22</sub>H<sub>28</sub>N<sub>2</sub>O<sub>3</sub> 368.2100; found 368.2106.

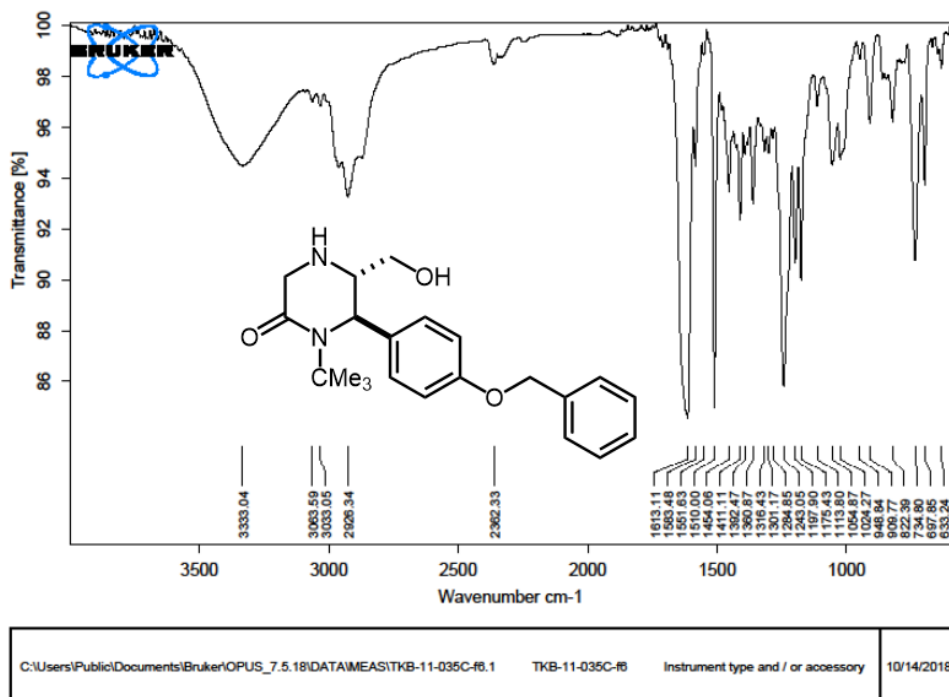

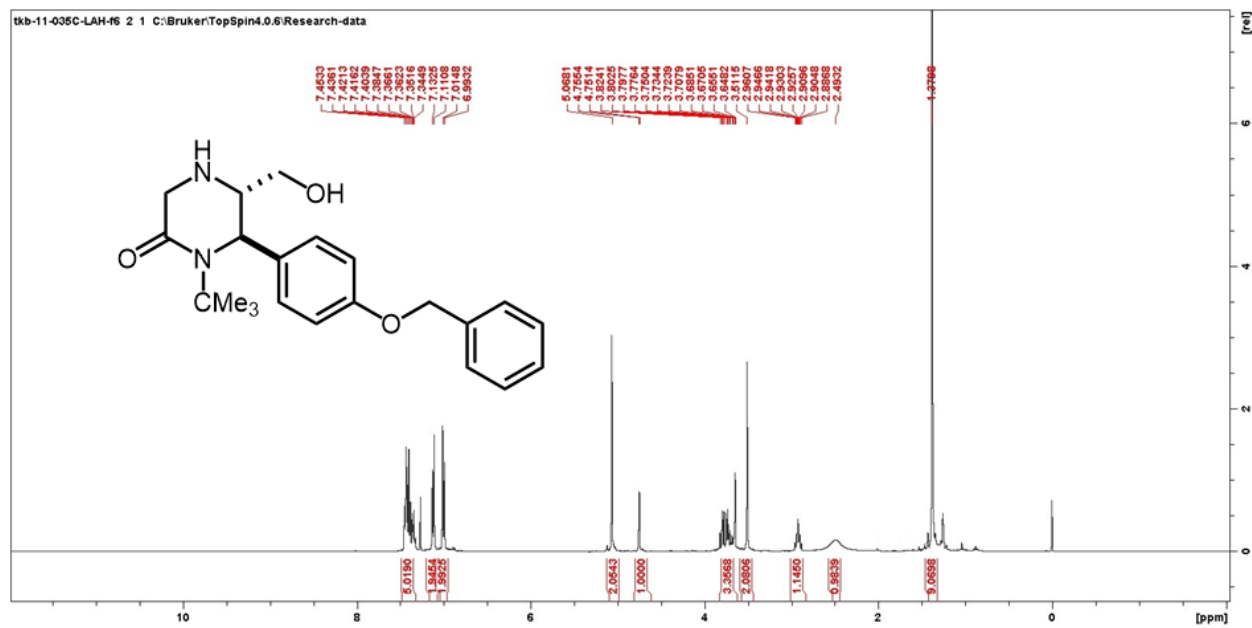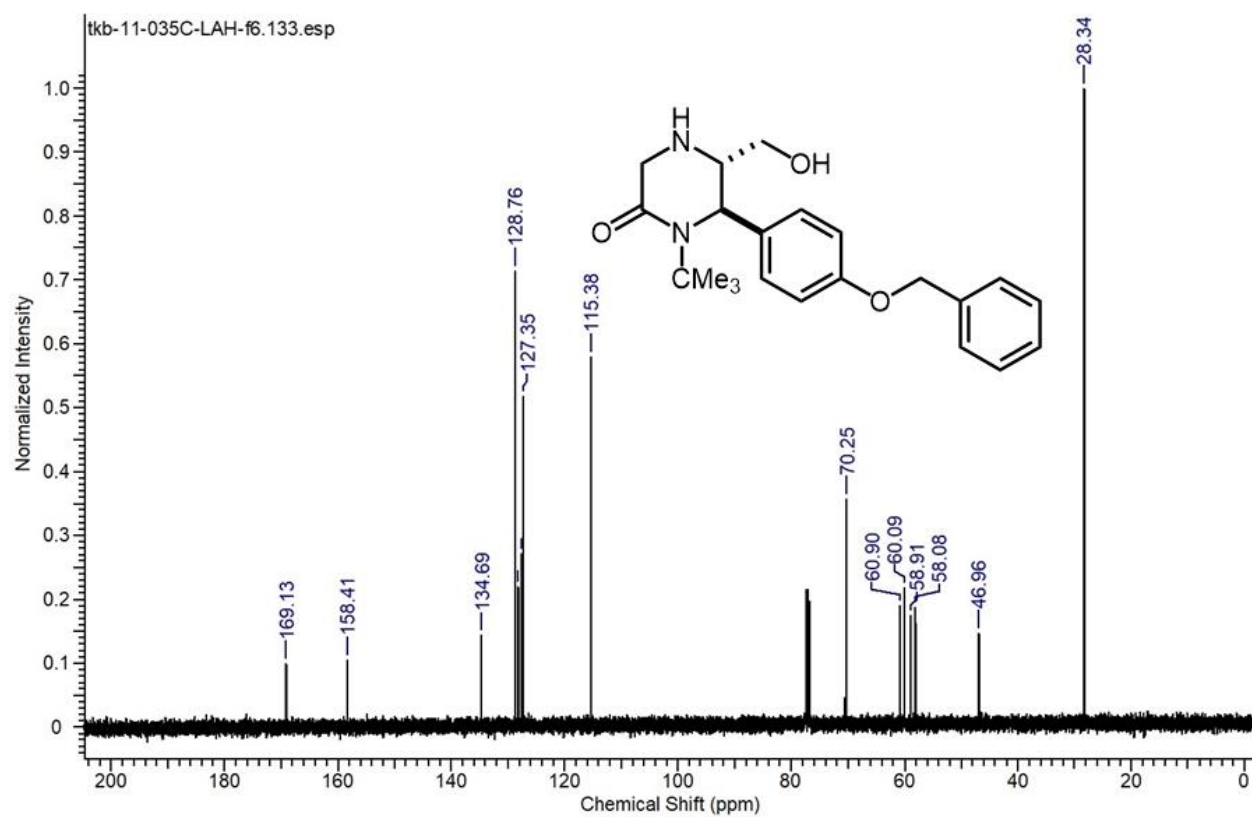



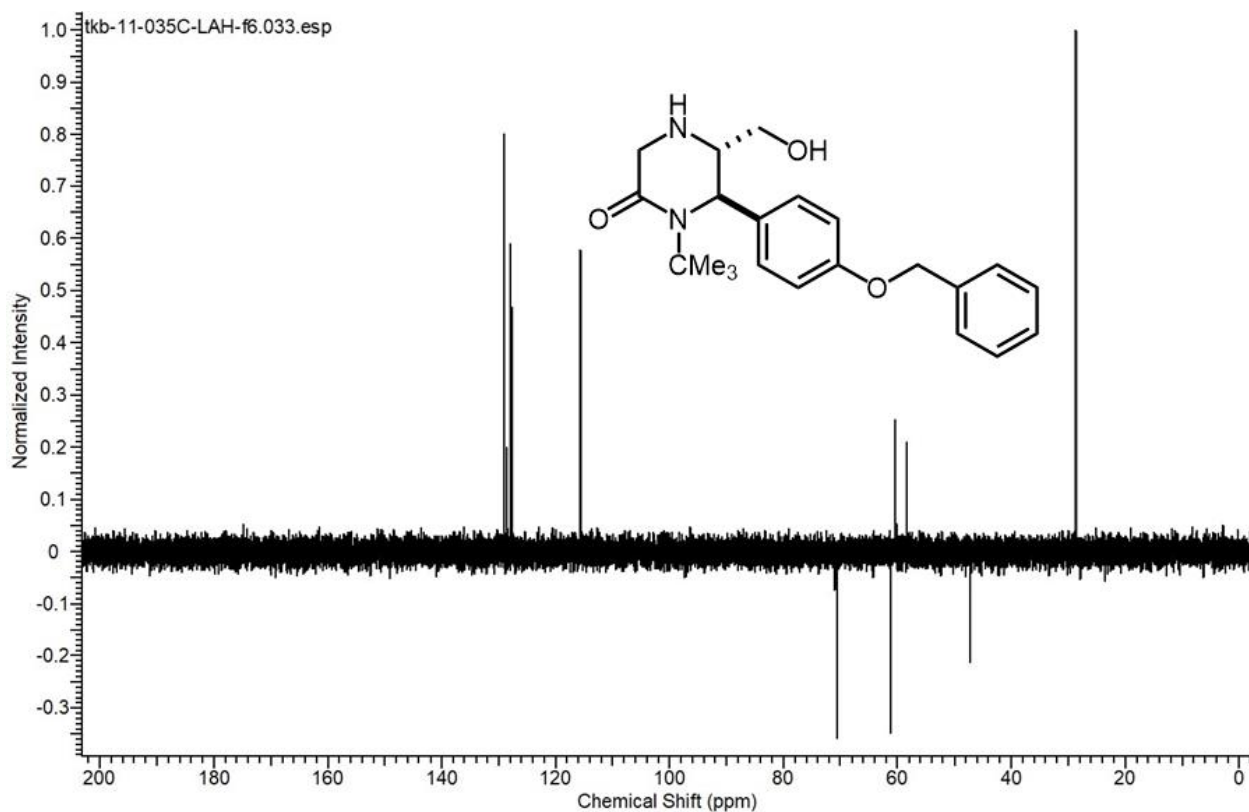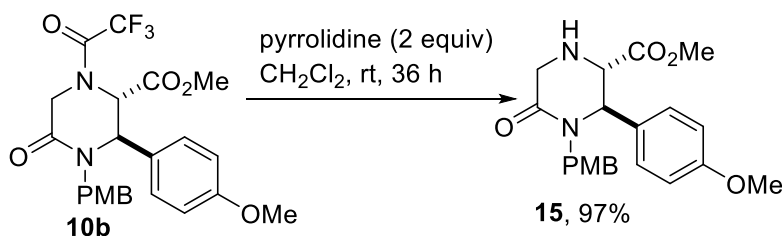

To a 10 mL round-bottomed flask equipped with a magnetic stir bar under a nitrogen atmosphere, at room temperature, was added ester **10b** (240 mg, 0.50 mmol) dissolved in DCM (5 mL) by means of a syringe. Pyrrolidine (71.1 mg, 1.0 mmol, 2 equiv) was then added. The reaction mixture was allowed to stir at room temperature until complete conversion (as judged by GC-MS and TLC analyses). The mixture was concentrated *in vacuo* to yield the amino ester as a pale yellow oil, which was purified by flash column chromatography on silica gel eluting with DCM:MeOH (1:1) Yield = 186 mg, 97%. <sup>1</sup>H NMR (400 MHz, CDCl<sub>3</sub>) δ 7.21 (d, *J* = 6.8 Hz, 2H), 7.11 (d, *J* = 7.2 Hz, 2H), 6.88 (d, *J* = 7.2 Hz, 2H), 6.81 (d, *J* = 6.8 Hz, 2H), 5.50 (d, *J* = 14.4 Hz, 1H), 4.70 (d, *J* = 17.0 Hz, 1H), 4.63 (d, *J* = 3.0 Hz, 1H), 4.42 (d, *J* = 17.0 Hz, 1H), 4.33 (d, *J* = 3.0 Hz, 1H), 3.79 (overlapping singlets, 6H), 3.51 (s, 3H), 3.32 (d, *J* = 14.4 Hz, 1H). <sup>13</sup>C NMR (101 MHz, CDCl<sub>3</sub>) δ 169.15, 166.40, 159.92, 159.31, 130.04, 128.74, 128.39, 127.80, 114.52, 114.03, 76.90, 65.22,

58.70, 55.38, 55.31, 52.30, 46.17. **HRMS-EI<sup>+</sup>** (*m/z*): calc'd for C<sub>21</sub>H<sub>24</sub>N<sub>2</sub>O<sub>5</sub> 384.1685; found 384.1693.

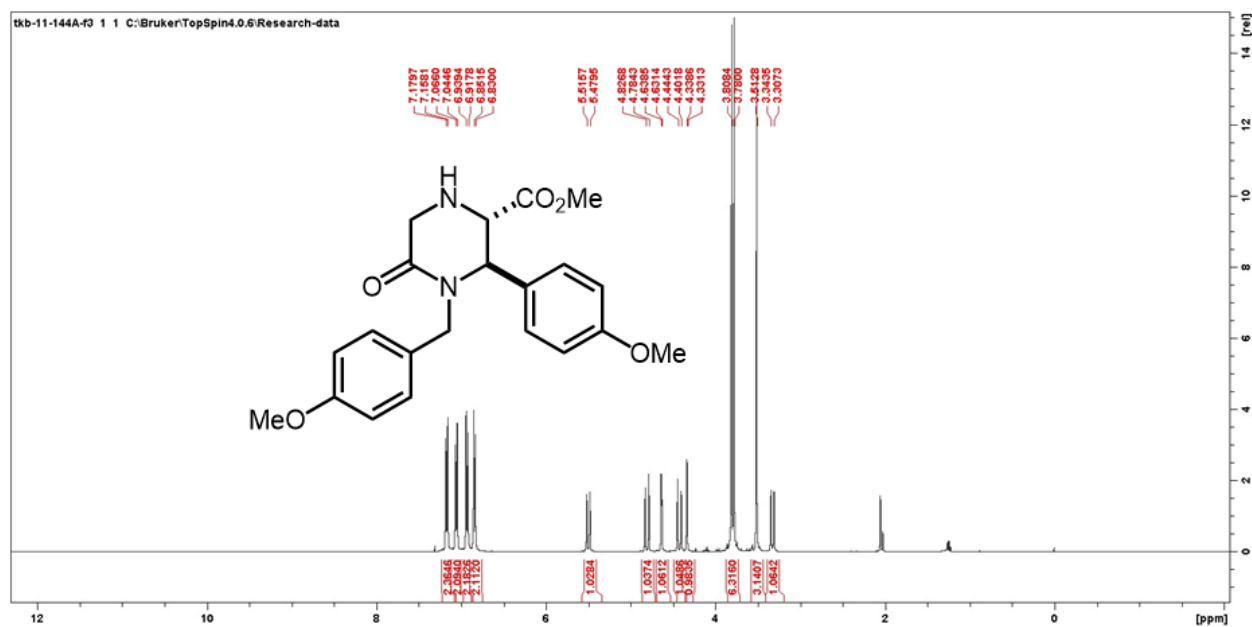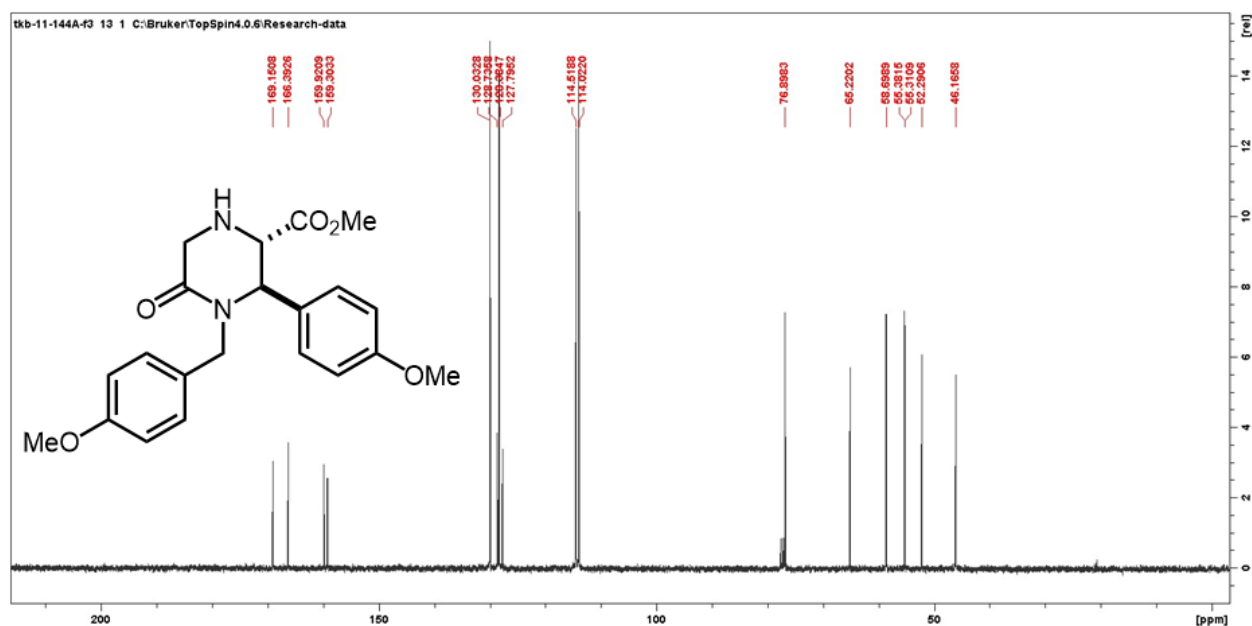

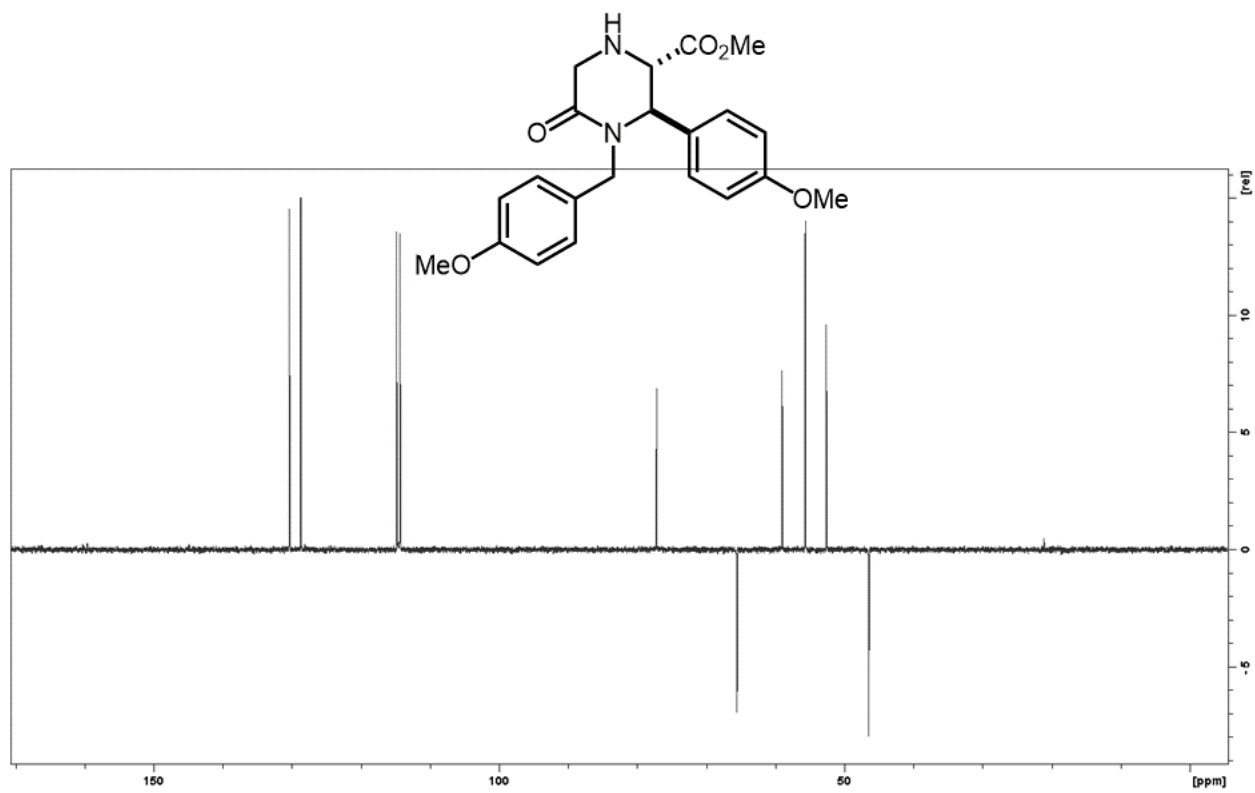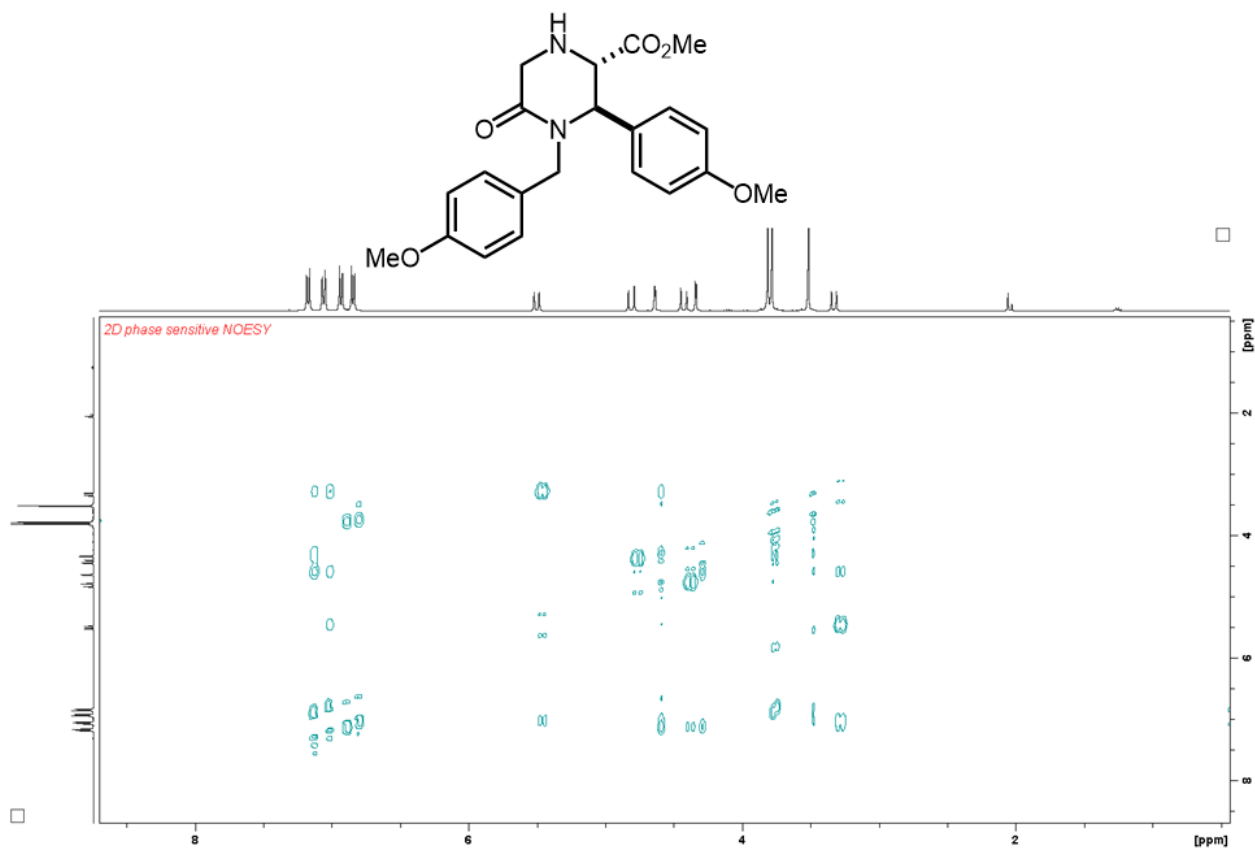

**References**

- (1) Dar'in, D.; Bakulina, O.; Chizhova, M.; Krasavin, M. *Org. Lett.* **2015**, *17*, 3930.
- (2) Beng, T. K.; Bassler, D. P. *Tetrahedron Lett.* **2014**, *55*, 6662.
- (3) Beng, T. K.; Wilkerson-Hill, S. M.; Sarpong, R. *Org. Lett.* **2014**, *16*, 916.
